# Supplementary material for: Characterization of human tear proteome reveals differentially abundance proteins in thyroid-associated ophthalmopathy
Source: PeerJ. 2022 Jul 12;10:e13701. doi: 10.7717/peerj.13701 (PMC9285480; doi:10.7717/peerj.13701)
Supplement: Supplemental Information 2 [file peerj-10-13701-s002.xlsx]

## Sheet: Sheet1
Supplemental Table 2. Detailed information on 313 proteins identified.
								TAO			HC			TAO			HC
Protein IDs	Majority protein IDs	Fasta headers	Proteins	Peptides	Unique peptides	Sequence coverage [%]	Mol. weight [kDa]	iBAQ P13282_JIBING	iBAQ P13282_JIBING_131222045923	iBAQ P13282_JIBING_131222075434	iBAQ P13282_ZHENGCHANG	iBAQ P13282_ZHENGCHANG_131221201433	iBAQ P13282_ZHENGCHANG_131221231632	LFQ intensity P13282_JIBING	LFQ intensity P13282_JIBING_131222045923	LFQ intensity P13282_JIBING_131222075434	LFQ intensity P13282_ZHENGCHANG	LFQ intensity P13282_ZHENGCHANG_131221201433	LFQ intensity P13282_ZHENGCHANG_131221231632
>sp|A0M8Q6|LAC7_HUMAN Ig lambda-7 chain C region OS=Homo sapiens GN=IGLC7 PE=1 SV=2	>sp|A0M8Q6|LAC7_HUMAN Ig lambda-7 chain C region OS=Homo sapiens GN=IGLC7 PE=1 SV=2	>sp|A0M8Q6|LAC7_HUMAN Ig lambda-7 chain C region OS=Homo sapiens GN=IGLC7 PE=1 SV=2	1	3	1	41.5	11.303	26005000	21271000	25185000	6446600	4911900	7122300	183530000	158630000	166620000	106690000	85667000	118480000
>sp|A6NMY6|AXA2L_HUMAN Putative annexin A2-like protein OS=Homo sapiens GN=ANXA2P2 PE=5 SV=2;>sp|P07355|ANXA2_HUMAN Annexin A2 OS=Homo sapiens GN=ANXA2 PE=1 SV=2;>tr|H0YN42|H0YN42_HUMAN Annexin (Fragment) OS=Homo sapiens GN=ANXA2 PE=3 SV=1;>tr|H0YM50|H0YM50_HUMAN Annexin (Fragment) OS=Homo sapiens GN=ANXA2 PE=3 SV=1;>tr|H0YMU9|H0YMU9_HUMAN Annexin OS=Homo sapiens GN=ANXA2 PE=3 SV=1;>tr|H0YMD0|H0Y…	>sp|A6NMY6|AXA2L_HUMAN Putative annexin A2-like protein OS=Homo sapiens GN=ANXA2P2 PE=5 SV=2;>sp|P07355|ANXA2_HUMAN Annexin A2 OS=Homo sapiens GN=ANXA2 PE=1 SV=2;>tr|H0YN42|H0YN42_HUMAN Annexin (Fragment) OS=Homo sapiens GN=ANXA2 PE=3 SV=1;>tr|H0YM50|H0YM50_HUMAN Annexin (Fragment) OS=Homo sapiens GN=ANXA2 PE=3 SV=1;>tr|H0YMU9|H0YMU9_HUMAN Annexin OS=Homo sapiens GN=ANXA2 PE=3 SV=1;>tr|H0YMD0|H0Y…	>sp|A6NMY6|AXA2L_HUMAN Putative annexin A2-like protein OS=Homo sapiens GN=ANXA2P2 PE=5 SV=2;>sp|P07355|ANXA2_HUMAN Annexin A2 OS=Homo sapiens GN=ANXA2 PE=1 SV=2;>tr|H0YN42|H0YN42_HUMAN Annexin (Fragment) OS=Homo sapiens GN=ANXA2 PE=3 SV=1;>tr|H0YM50|H0YM5	15	1	1	3.2	38.659	2127500	1964000	2430000	1657500	1286800	720590	45851000	44727000	49092000	84936000	71508000	41775000
>sp|O00151|PDLI1_HUMAN PDZ and LIM domain protein 1 OS=Homo sapiens GN=PDLIM1 PE=1 SV=4	>sp|O00151|PDLI1_HUMAN PDZ and LIM domain protein 1 OS=Homo sapiens GN=PDLIM1 PE=1 SV=4	>sp|O00151|PDLI1_HUMAN PDZ and LIM domain protein 1 OS=Homo sapiens GN=PDLIM1 PE=1 SV=4	1	1	1	3	36.071	0	1585600	2730100	581260	270880	429870	0	23008000	30517000	20052000	12481000	16454000
>sp|O00299|CLIC1_HUMAN Chloride intracellular channel protein 1 OS=Homo sapiens GN=CLIC1 PE=1 SV=4;>tr|Q53FB0|Q53FB0_HUMAN Chloride intracellular channel 1 variant (Fragment) OS=Homo sapiens PE=2 SV=1;>tr|Q5SRT3|Q5SRT3_HUMAN Chloride intracellular channel 1 OS=Homo sapiens GN=CLIC1 PE=2 SV=2	>sp|O00299|CLIC1_HUMAN Chloride intracellular channel protein 1 OS=Homo sapiens GN=CLIC1 PE=1 SV=4;>tr|Q53FB0|Q53FB0_HUMAN Chloride intracellular channel 1 variant (Fragment) OS=Homo sapiens PE=2 SV=1;>tr|Q5SRT3|Q5SRT3_HUMAN Chloride intracellular channel 1 OS=Homo sapiens GN=CLIC1 PE=2 SV=2	>sp|O00299|CLIC1_HUMAN Chloride intracellular channel protein 1 OS=Homo sapiens GN=CLIC1 PE=1 SV=4;>tr|Q53FB0|Q53FB0_HUMAN Chloride intracellular channel 1 variant (Fragment) OS=Homo sapiens PE=2 SV=1;>tr|Q5SRT3|Q5SRT3_HUMAN Chloride intracellular channel	3	1	1	7.5	26.922	4620900	4063900	3629200	0	0	827840	69314000	64416000	51033000	0	0	29271000
>sp|O00391|QSOX1_HUMAN Sulfhydryl oxidase 1 OS=Homo sapiens GN=QSOX1 PE=1 SV=3;>tr|A8K477|A8K477_HUMAN cDNA FLJ78571, highly similar to Homo sapiens sulfhydryl oxidase mRNA OS=Homo sapiens PE=2 SV=1;>tr|A8K4C2|A8K4C2_HUMAN cDNA FLJ75458, highly similar to Homo sapiens sulfhydryl oxidase mRNA OS=Homo sapiens PE=2 SV=1	>sp|O00391|QSOX1_HUMAN Sulfhydryl oxidase 1 OS=Homo sapiens GN=QSOX1 PE=1 SV=3;>tr|A8K477|A8K477_HUMAN cDNA FLJ78571, highly similar to Homo sapiens sulfhydryl oxidase mRNA OS=Homo sapiens PE=2 SV=1;>tr|A8K4C2|A8K4C2_HUMAN cDNA FLJ75458, highly similar to Homo sapiens sulfhydryl oxidase mRNA OS=Homo sapiens PE=2 SV=1	>sp|O00391|QSOX1_HUMAN Sulfhydryl oxidase 1 OS=Homo sapiens GN=QSOX1 PE=1 SV=3;>tr|A8K477|A8K477_HUMAN cDNA FLJ78571, highly similar to Homo sapiens sulfhydryl oxidase mRNA OS=Homo sapiens PE=2 SV=1;>tr|A8K4C2|A8K4C2_HUMAN cDNA FLJ75458, highly similar to	3	1	1	1.3	82.577	660250	574840	772010	283740	83339	152030	30371000	27942000	33291000	30609000	8890800	13848000
>tr|B4DE64|B4DE64_HUMAN Programmed cell death protein 5 OS=Homo sapiens GN=PDCD5 PE=2 SV=1;>sp|O14737|PDCD5_HUMAN Programmed cell death protein 5 OS=Homo sapiens GN=PDCD5 PE=1 SV=3;>tr|K7ESJ4|K7ESJ4_HUMAN Programmed cell death protein 5 OS=Homo sapiens GN=PDCD5 PE=4 SV=1;>tr|K7EPG2|K7EPG2_HUMAN Programmed cell death protein 5 OS=Homo sapiens GN=PDCD5 PE=4 SV=1;>tr|Q3HM38|Q3HM38_HUMAN Programmed c…	>tr|B4DE64|B4DE64_HUMAN Programmed cell death protein 5 OS=Homo sapiens GN=PDCD5 PE=2 SV=1;>sp|O14737|PDCD5_HUMAN Programmed cell death protein 5 OS=Homo sapiens GN=PDCD5 PE=1 SV=3;>tr|K7ESJ4|K7ESJ4_HUMAN Programmed cell death protein 5 OS=Homo sapiens GN=PDCD5 PE=4 SV=1;>tr|K7EPG2|K7EPG2_HUMAN Programmed cell death protein 5 OS=Homo sapiens GN=PDCD5 PE=4 SV=1;>tr|Q3HM38|Q3HM38_HUMAN Programmed c…	>tr|B4DE64|B4DE64_HUMAN Programmed cell death protein 5 OS=Homo sapiens GN=PDCD5 PE=2 SV=1;>sp|O14737|PDCD5_HUMAN Programmed cell death protein 5 OS=Homo sapiens GN=PDCD5 PE=1 SV=3;>tr|K7ESJ4|K7ESJ4_HUMAN Programmed cell death protein 5 OS=Homo sapiens GN=	5	1	1	10.1	14.997	0	332510	354760	0	0	0	0	2784700	2709100	0	0	0
>tr|A5PL32|A5PL32_HUMAN APOL1 protein (Fragment) OS=Homo sapiens GN=APOL1 PE=2 SV=1;>tr|Q1WWL5|Q1WWL5_HUMAN APOL1 protein (Fragment) OS=Homo sapiens GN=APOL1 PE=2 SV=1;>tr|Q29RW7|Q29RW7_HUMAN APOL1 protein (Fragment) OS=Homo sapiens GN=APOL1 PE=2 SV=1;>tr|B2R9E5|B2R9E5_HUMAN cDNA, FLJ94353, highly similar to Homo sapiens apolipoprotein L, 1 (APOL1), transcript variant 2, mRNA OS=Homo sapiens PE=2…	>tr|A5PL32|A5PL32_HUMAN APOL1 protein (Fragment) OS=Homo sapiens GN=APOL1 PE=2 SV=1;>tr|Q1WWL5|Q1WWL5_HUMAN APOL1 protein (Fragment) OS=Homo sapiens GN=APOL1 PE=2 SV=1;>tr|Q29RW7|Q29RW7_HUMAN APOL1 protein (Fragment) OS=Homo sapiens GN=APOL1 PE=2 SV=1;>tr|B2R9E5|B2R9E5_HUMAN cDNA, FLJ94353, highly similar to Homo sapiens apolipoprotein L, 1 (APOL1), transcript variant 2, mRNA OS=Homo sapiens PE=2…	>tr|A5PL32|A5PL32_HUMAN APOL1 protein (Fragment) OS=Homo sapiens GN=APOL1 PE=2 SV=1;>tr|Q1WWL5|Q1WWL5_HUMAN APOL1 protein (Fragment) OS=Homo sapiens GN=APOL1 PE=2 SV=1;>tr|Q29RW7|Q29RW7_HUMAN APOL1 protein (Fragment) OS=Homo sapiens GN=APOL1 PE=2 SV=1;>tr|	10	2	2	5.2	48.516	1019400	0	1832700	0	0	0	0	0	37798000	0	0	0
>sp|O15195|VILL_HUMAN Villin-like protein OS=Homo sapiens GN=VILL PE=2 SV=3;>tr|D6R9H2|D6R9H2_HUMAN Villin-like protein OS=Homo sapiens GN=VILL PE=4 SV=1;>tr|H7BZ43|H7BZ43_HUMAN Villin-like protein (Fragment) OS=Homo sapiens GN=VILL PE=4 SV=1	>sp|O15195|VILL_HUMAN Villin-like protein OS=Homo sapiens GN=VILL PE=2 SV=3;>tr|D6R9H2|D6R9H2_HUMAN Villin-like protein OS=Homo sapiens GN=VILL PE=4 SV=1;>tr|H7BZ43|H7BZ43_HUMAN Villin-like protein (Fragment) OS=Homo sapiens GN=VILL PE=4 SV=1	>sp|O15195|VILL_HUMAN Villin-like protein OS=Homo sapiens GN=VILL PE=2 SV=3;>tr|D6R9H2|D6R9H2_HUMAN Villin-like protein OS=Homo sapiens GN=VILL PE=4 SV=1;>tr|H7BZ43|H7BZ43_HUMAN Villin-like protein (Fragment) OS=Homo sapiens GN=VILL PE=4 SV=1	3	2	2	2.6	95.906	10045000	11907000	12609000	14390000	12642000	13671000	443610000	591460000	413950000	1484100000	1400700000	1433700000
>tr|B3KS98|B3KS98_HUMAN Eukaryotic translation initiation factor 3 subunit H OS=Homo sapiens GN=EIF3S3 PE=2 SV=1;>sp|O15372|EIF3H_HUMAN Eukaryotic translation initiation factor 3 subunit H OS=Homo sapiens GN=EIF3H PE=1 SV=1;>tr|Q53HG0|Q53HG0_HUMAN Eukaryotic translation initiation factor 3, subunit 3 gamma, 40kDa variant (Fragment) OS=Homo sapiens PE=2 SV=1;>tr|Q53HR0|Q53HR0_HUMAN Eukaryotic tran…	>tr|B3KS98|B3KS98_HUMAN Eukaryotic translation initiation factor 3 subunit H OS=Homo sapiens GN=EIF3S3 PE=2 SV=1;>sp|O15372|EIF3H_HUMAN Eukaryotic translation initiation factor 3 subunit H OS=Homo sapiens GN=EIF3H PE=1 SV=1;>tr|Q53HG0|Q53HG0_HUMAN Eukaryotic translation initiation factor 3, subunit 3 gamma, 40kDa variant (Fragment) OS=Homo sapiens PE=2 SV=1;>tr|Q53HR0|Q53HR0_HUMAN Eukaryotic tran…	>tr|B3KS98|B3KS98_HUMAN Eukaryotic translation initiation factor 3 subunit H OS=Homo sapiens GN=EIF3S3 PE=2 SV=1;>sp|O15372|EIF3H_HUMAN Eukaryotic translation initiation factor 3 subunit H OS=Homo sapiens GN=EIF3H PE=1 SV=1;>tr|Q53HG0|Q53HG0_HUMAN Eukaryot	12	1	1	5.2	41.581	279550	197540	259240	0	0	0	5591100	4174900	4860500	0	0	0
>sp|O43242|PSMD3_HUMAN 26S proteasome non-ATPase regulatory subunit 3 OS=Homo sapiens GN=PSMD3 PE=1 SV=2;>tr|Q6IBN0|Q6IBN0_HUMAN PSMD3 protein OS=Homo sapiens GN=PSMD3 PE=2 SV=1;>tr|Q8N9M2|Q8N9M2_HUMAN cDNA FLJ36887 fis, clone BNGH42005504, highly similar to 26S PROTEASOME REGULATORY SUBUNIT S3 OS=Homo sapiens PE=2 SV=1;>tr|B4DV84|B4DV84_HUMAN cDNA FLJ56159, highly similar to 26S proteasome non-A…	>sp|O43242|PSMD3_HUMAN 26S proteasome non-ATPase regulatory subunit 3 OS=Homo sapiens GN=PSMD3 PE=1 SV=2;>tr|Q6IBN0|Q6IBN0_HUMAN PSMD3 protein OS=Homo sapiens GN=PSMD3 PE=2 SV=1;>tr|Q8N9M2|Q8N9M2_HUMAN cDNA FLJ36887 fis, clone BNGH42005504, highly similar to 26S PROTEASOME REGULATORY SUBUNIT S3 OS=Homo sapiens PE=2 SV=1;>tr|B4DV84|B4DV84_HUMAN cDNA FLJ56159, highly similar to 26S proteasome non-A…	>sp|O43242|PSMD3_HUMAN 26S proteasome non-ATPase regulatory subunit 3 OS=Homo sapiens GN=PSMD3 PE=1 SV=2;>tr|Q6IBN0|Q6IBN0_HUMAN PSMD3 protein OS=Homo sapiens GN=PSMD3 PE=2 SV=1;>tr|Q8N9M2|Q8N9M2_HUMAN cDNA FLJ36887 fis, clone BNGH42005504, highly similar	7	1	1	3	60.977	0	83677	100560	0	0	0	0	3006400	3205100	0	0	0
>sp|O43707|ACTN4_HUMAN Alpha-actinin-4 OS=Homo sapiens GN=ACTN4 PE=1 SV=2;>tr|D6PXK4|D6PXK4_HUMAN Alpha actinin 4 short isoform OS=Homo sapiens GN=ACTN4 PE=2 SV=1;>tr|Q96BG6|Q96BG6_HUMAN ACTN4 protein (Fragment) OS=Homo sapiens GN=ACTN4 PE=2 SV=2;>tr|A4K467|A4K467_HUMAN Actinin alpha4 isoform OS=Homo sapiens GN=ACTN4 PE=2 SV=1;>tr|F5GXS2|F5GXS2_HUMAN Alpha-actinin-4 OS=Homo sapiens GN=ACTN4 PE=4 …	>sp|O43707|ACTN4_HUMAN Alpha-actinin-4 OS=Homo sapiens GN=ACTN4 PE=1 SV=2;>tr|D6PXK4|D6PXK4_HUMAN Alpha actinin 4 short isoform OS=Homo sapiens GN=ACTN4 PE=2 SV=1;>tr|Q96BG6|Q96BG6_HUMAN ACTN4 protein (Fragment) OS=Homo sapiens GN=ACTN4 PE=2 SV=2;>tr|A4K467|A4K467_HUMAN Actinin alpha4 isoform OS=Homo sapiens GN=ACTN4 PE=2 SV=1;>tr|F5GXS2|F5GXS2_HUMAN Alpha-actinin-4 OS=Homo sapiens GN=ACTN4 PE=4 …	>sp|O43707|ACTN4_HUMAN Alpha-actinin-4 OS=Homo sapiens GN=ACTN4 PE=1 SV=2;>tr|D6PXK4|D6PXK4_HUMAN Alpha actinin 4 short isoform OS=Homo sapiens GN=ACTN4 PE=2 SV=1;>tr|Q96BG6|Q96BG6_HUMAN ACTN4 protein (Fragment) OS=Homo sapiens GN=ACTN4 PE=2 SV=2;>tr|A4K46	18	2	2	2.9	104.85	777830	0	241650	0	0	0	42780000	0	0	0	0	0
>sp|O43852|CALU_HUMAN Calumenin OS=Homo sapiens GN=CALU PE=1 SV=2;>tr|B3KNG6|B3KNG6_HUMAN cDNA FLJ14554 fis, clone NT2RM2001839, highly similar to Calumenin OS=Homo sapiens PE=2 SV=1;>tr|B3KQF5|B3KQF5_HUMAN cDNA FLJ90381 fis, clone NT2RP2005035, highly similar to Calumenin OS=Homo sapiens PE=2 SV=1;>tr|Q6IAW5|Q6IAW5_HUMAN CALU protein OS=Homo sapiens GN=CALU PE=2 SV=1;>tr|D6QS49|D6QS49_HUMAN Calu…	>sp|O43852|CALU_HUMAN Calumenin OS=Homo sapiens GN=CALU PE=1 SV=2;>tr|B3KNG6|B3KNG6_HUMAN cDNA FLJ14554 fis, clone NT2RM2001839, highly similar to Calumenin OS=Homo sapiens PE=2 SV=1;>tr|B3KQF5|B3KQF5_HUMAN cDNA FLJ90381 fis, clone NT2RP2005035, highly similar to Calumenin OS=Homo sapiens PE=2 SV=1;>tr|Q6IAW5|Q6IAW5_HUMAN CALU protein OS=Homo sapiens GN=CALU PE=2 SV=1;>tr|D6QS49|D6QS49_HUMAN Calu…	>sp|O43852|CALU_HUMAN Calumenin OS=Homo sapiens GN=CALU PE=1 SV=2;>tr|B3KNG6|B3KNG6_HUMAN cDNA FLJ14554 fis, clone NT2RM2001839, highly similar to Calumenin OS=Homo sapiens PE=2 SV=1;>tr|B3KQF5|B3KQF5_HUMAN cDNA FLJ90381 fis, clone NT2RP2005035, highly sim	20	4	4	10.8	37.106	1377900	11784000	10779000	13119000	10075000	11074000	82469000	214900000	164510000	501590000	391930000	314780000
>tr|B4DR52|B4DR52_HUMAN Histone H2B OS=Homo sapiens GN=HIST2H2BF PE=2 SV=1;>tr|I6L9F7|I6L9F7_HUMAN Histone H2B (Fragment) OS=Homo sapiens GN=HIST1H2BM PE=2 SV=1;>sp|Q96A08|H2B1A_HUMAN Histone H2B type 1-A OS=Homo sapiens GN=HIST1H2BA PE=1 SV=3;>sp|O60814|H2B1K_HUMAN Histone H2B type 1-K OS=Homo sapiens GN=HIST1H2BK PE=1 SV=3;>sp|P06899|H2B1J_HUMAN Histone H2B type 1-J OS=Homo sapiens GN=HIST1H2BJ…	>tr|B4DR52|B4DR52_HUMAN Histone H2B OS=Homo sapiens GN=HIST2H2BF PE=2 SV=1;>tr|I6L9F7|I6L9F7_HUMAN Histone H2B (Fragment) OS=Homo sapiens GN=HIST1H2BM PE=2 SV=1;>sp|Q96A08|H2B1A_HUMAN Histone H2B type 1-A OS=Homo sapiens GN=HIST1H2BA PE=1 SV=3;>sp|O60814|H2B1K_HUMAN Histone H2B type 1-K OS=Homo sapiens GN=HIST1H2BK PE=1 SV=3;>sp|P06899|H2B1J_HUMAN Histone H2B type 1-J OS=Homo sapiens GN=HIST1H2BJ…	>tr|B4DR52|B4DR52_HUMAN Histone H2B OS=Homo sapiens GN=HIST2H2BF PE=2 SV=1;>tr|I6L9F7|I6L9F7_HUMAN Histone H2B (Fragment) OS=Homo sapiens GN=HIST1H2BM PE=2 SV=1;>sp|Q96A08|H2B1A_HUMAN Histone H2B type 1-A OS=Homo sapiens GN=HIST1H2BA PE=1 SV=3;>sp|O60814|H	20	2	2	11.4	18.041	18846000	18611000	23216000	3527900	3296200	1146200	224580000	182010000	257900000	98592000	97074000	32197000
>sp|O75368|SH3L1_HUMAN SH3 domain-binding glutamic acid-rich-like protein OS=Homo sapiens GN=SH3BGRL PE=1 SV=1;>tr|D3DTE6|D3DTE6_HUMAN SH3 domain-binding glutamic acid-rich-like protein OS=Homo sapiens GN=SH3BGRL PE=3 SV=1	>sp|O75368|SH3L1_HUMAN SH3 domain-binding glutamic acid-rich-like protein OS=Homo sapiens GN=SH3BGRL PE=1 SV=1;>tr|D3DTE6|D3DTE6_HUMAN SH3 domain-binding glutamic acid-rich-like protein OS=Homo sapiens GN=SH3BGRL PE=3 SV=1	>sp|O75368|SH3L1_HUMAN SH3 domain-binding glutamic acid-rich-like protein OS=Homo sapiens GN=SH3BGRL PE=1 SV=1;>tr|D3DTE6|D3DTE6_HUMAN SH3 domain-binding glutamic acid-rich-like protein OS=Homo sapiens GN=SH3BGRL PE=3 SV=1	2	1	1	8.8	12.774	4171700	5763800	5476000	411590	328540	365540	39839000	58165000	49023000	5179400	4549300	4756700
>sp|O75556|SG2A1_HUMAN Mammaglobin-B OS=Homo sapiens GN=SCGB2A1 PE=1 SV=1	>sp|O75556|SG2A1_HUMAN Mammaglobin-B OS=Homo sapiens GN=SCGB2A1 PE=1 SV=1	>sp|O75556|SG2A1_HUMAN Mammaglobin-B OS=Homo sapiens GN=SCGB2A1 PE=1 SV=1	1	4	4	49.5	10.884	4379200000	4348200000	4813400000	3863700000	3607900000	3717600000	25450000000	26793000000	26628000000	56966000000	56597000000	53801000000
>sp|O75874|IDHC_HUMAN Isocitrate dehydrogenase [NADP] cytoplasmic OS=Homo sapiens GN=IDH1 PE=1 SV=2;>tr|B2R5M8|B2R5M8_HUMAN Isocitrate dehydrogenase [NADP] OS=Homo sapiens PE=2 SV=1;>tr|Q6FHQ6|Q6FHQ6_HUMAN Isocitrate dehydrogenase [NADP] (Fragment) OS=Homo sapiens GN=IDH1 PE=2 SV=1;>tr|Q6FI37|Q6FI37_HUMAN Isocitrate dehydrogenase [NADP] OS=Homo sapiens GN=IDH1 PE=2 SV=1;>tr|Q6FIA4|Q6FIA4_HUMAN Is…	>sp|O75874|IDHC_HUMAN Isocitrate dehydrogenase [NADP] cytoplasmic OS=Homo sapiens GN=IDH1 PE=1 SV=2;>tr|B2R5M8|B2R5M8_HUMAN Isocitrate dehydrogenase [NADP] OS=Homo sapiens PE=2 SV=1;>tr|Q6FHQ6|Q6FHQ6_HUMAN Isocitrate dehydrogenase [NADP] (Fragment) OS=Homo sapiens GN=IDH1 PE=2 SV=1;>tr|Q6FI37|Q6FI37_HUMAN Isocitrate dehydrogenase [NADP] OS=Homo sapiens GN=IDH1 PE=2 SV=1;>tr|Q6FIA4|Q6FIA4_HUMAN Is…	>sp|O75874|IDHC_HUMAN Isocitrate dehydrogenase [NADP] cytoplasmic OS=Homo sapiens GN=IDH1 PE=1 SV=2;>tr|B2R5M8|B2R5M8_HUMAN Isocitrate dehydrogenase [NADP] OS=Homo sapiens PE=2 SV=1;>tr|Q6FHQ6|Q6FHQ6_HUMAN Isocitrate dehydrogenase [NADP] (Fragment) OS=Homo	9	2	2	5.1	46.659	1993700	931750	1465100	0	186320	622100	32134000	28025000	33100000	0	19165000	34202000
>sp|O75888|TNF13_HUMAN Tumor necrosis factor ligand superfamily member 13 OS=Homo sapiens GN=TNFSF13 PE=1 SV=1;>tr|Q6FGN4|Q6FGN4_HUMAN HCG2045906, isoform CRA_d (Fragment) OS=Homo sapiens GN=TNFSF13 PE=2 SV=1;>tr|Q6FGR7|Q6FGR7_HUMAN TNFSF13 protein OS=Homo sapiens GN=TNFSF13 PE=2 SV=1;>tr|Q8NFH7|Q8NFH7_HUMAN Proliferation-inducing ligand APRIL OS=Homo sapiens PE=2 SV=1;>tr|B3KR02|B3KR02_HUMAN HCG…	>sp|O75888|TNF13_HUMAN Tumor necrosis factor ligand superfamily member 13 OS=Homo sapiens GN=TNFSF13 PE=1 SV=1;>tr|Q6FGN4|Q6FGN4_HUMAN HCG2045906, isoform CRA_d (Fragment) OS=Homo sapiens GN=TNFSF13 PE=2 SV=1;>tr|Q6FGR7|Q6FGR7_HUMAN TNFSF13 protein OS=Homo sapiens GN=TNFSF13 PE=2 SV=1;>tr|Q8NFH7|Q8NFH7_HUMAN Proliferation-inducing ligand APRIL OS=Homo sapiens PE=2 SV=1;>tr|B3KR02|B3KR02_HUMAN HCG…	>sp|O75888|TNF13_HUMAN Tumor necrosis factor ligand superfamily member 13 OS=Homo sapiens GN=TNFSF13 PE=1 SV=1;>tr|Q6FGN4|Q6FGN4_HUMAN HCG2045906, isoform CRA_d (Fragment) OS=Homo sapiens GN=TNFSF13 PE=2 SV=1;>tr|Q6FGR7|Q6FGR7_HUMAN TNFSF13 protein OS=Homo	9	1	1	3.2	27.433	0	487000	868260	736350	400090	720570	0	4631600	7325500	15542000	8898800	15287000
>sp|O76003|GLRX3_HUMAN Glutaredoxin-3 OS=Homo sapiens GN=GLRX3 PE=1 SV=2	>sp|O76003|GLRX3_HUMAN Glutaredoxin-3 OS=Homo sapiens GN=GLRX3 PE=1 SV=2	>sp|O76003|GLRX3_HUMAN Glutaredoxin-3 OS=Homo sapiens GN=GLRX3 PE=1 SV=2	1	1	1	7.8	37.432	0	186210	133570	0	0	0	0	3621200	2888700	0	0	0
>sp|O95336|6PGL_HUMAN 6-phosphogluconolactonase OS=Homo sapiens GN=PGLS PE=1 SV=2	>sp|O95336|6PGL_HUMAN 6-phosphogluconolactonase OS=Homo sapiens GN=PGLS PE=1 SV=2	>sp|O95336|6PGL_HUMAN 6-phosphogluconolactonase OS=Homo sapiens GN=PGLS PE=1 SV=2	1	1	1	10.9	27.547	0	295500	197860	0	0	0	0	3438200	2326300	0	0	0
>sp|O95359|TACC2_HUMAN Transforming acidic coiled-coil-containing protein 2 OS=Homo sapiens GN=TACC2 PE=1 SV=3;>tr|B7ZMJ9|B7ZMJ9_HUMAN TACC2 protein OS=Homo sapiens GN=TACC2 PE=2 SV=1;>tr|E9PBC6|E9PBC6_HUMAN Transforming acidic coiled-coil-containing protein 2 OS=Homo sapiens GN=TACC2 PE=4 SV=1;>tr|B2RWP4|B2RWP4_HUMAN TACC2 protein OS=Homo sapiens GN=TACC2 PE=2 SV=1;>tr|E7EMZ9|E7EMZ9_HUMAN Transf…	>sp|O95359|TACC2_HUMAN Transforming acidic coiled-coil-containing protein 2 OS=Homo sapiens GN=TACC2 PE=1 SV=3;>tr|B7ZMJ9|B7ZMJ9_HUMAN TACC2 protein OS=Homo sapiens GN=TACC2 PE=2 SV=1;>tr|E9PBC6|E9PBC6_HUMAN Transforming acidic coiled-coil-containing protein 2 OS=Homo sapiens GN=TACC2 PE=4 SV=1;>tr|B2RWP4|B2RWP4_HUMAN TACC2 protein OS=Homo sapiens GN=TACC2 PE=2 SV=1;>tr|E7EMZ9|E7EMZ9_HUMAN Transf…	>sp|O95359|TACC2_HUMAN Transforming acidic coiled-coil-containing protein 2 OS=Homo sapiens GN=TACC2 PE=1 SV=3;>tr|B7ZMJ9|B7ZMJ9_HUMAN TACC2 protein OS=Homo sapiens GN=TACC2 PE=2 SV=1;>tr|E9PBC6|E9PBC6_HUMAN Transforming acidic coiled-coil-containing prote	6	1	1	0.4	309.42	8330	0	8695.1	0	0	0	1099600	0	1076000	0	0	0
>sp|O95865|DDAH2_HUMAN N(G),N(G)-dimethylarginine dimethylaminohydrolase 2 OS=Homo sapiens GN=DDAH2 PE=1 SV=1;>tr|Q5SRR8|Q5SRR8_HUMAN Dimethylarginine dimethylaminohydrolase 2 (Fragment) OS=Homo sapiens GN=DDAH2 PE=4 SV=2;>tr|Q5SSV3|Q5SSV3_HUMAN Dimethylarginine dimethylaminohydrolase 2 (Fragment) OS=Homo sapiens GN=DDAH2 PE=4 SV=1;>tr|A3KGN5|A3KGN5_HUMAN Dimethylarginine dimethylaminohydrolase 2…	>sp|O95865|DDAH2_HUMAN N(G),N(G)-dimethylarginine dimethylaminohydrolase 2 OS=Homo sapiens GN=DDAH2 PE=1 SV=1;>tr|Q5SRR8|Q5SRR8_HUMAN Dimethylarginine dimethylaminohydrolase 2 (Fragment) OS=Homo sapiens GN=DDAH2 PE=4 SV=2;>tr|Q5SSV3|Q5SSV3_HUMAN Dimethylarginine dimethylaminohydrolase 2 (Fragment) OS=Homo sapiens GN=DDAH2 PE=4 SV=1;>tr|A3KGN5|A3KGN5_HUMAN Dimethylarginine dimethylaminohydrolase 2…	>sp|O95865|DDAH2_HUMAN N(G),N(G)-dimethylarginine dimethylaminohydrolase 2 OS=Homo sapiens GN=DDAH2 PE=1 SV=1;>tr|Q5SRR8|Q5SRR8_HUMAN Dimethylarginine dimethylaminohydrolase 2 (Fragment) OS=Homo sapiens GN=DDAH2 PE=4 SV=2;>tr|Q5SSV3|Q5SSV3_HUMAN Dimethylar	6	1	1	4.2	29.644	711860	556370	784370	0	82650	0	13046000	10774000	9994000	0	4254800	0
>sp|O95968|SG1D1_HUMAN Secretoglobin family 1D member 1 OS=Homo sapiens GN=SCGB1D1 PE=1 SV=1	>sp|O95968|SG1D1_HUMAN Secretoglobin family 1D member 1 OS=Homo sapiens GN=SCGB1D1 PE=1 SV=1	>sp|O95968|SG1D1_HUMAN Secretoglobin family 1D member 1 OS=Homo sapiens GN=SCGB1D1 PE=1 SV=1	1	5	5	24.4	9.898	6658500000	5985000000	6593800000	6009200000	5725200000	5981500000	26317000000	24399000000	23720000000	57172000000	58381000000	58104000000
>tr|Q4JM47|Q4JM47_HUMAN AGR2 OS=Homo sapiens GN=AGR2 PE=2 SV=1;>tr|B5MC07|B5MC07_HUMAN Anterior gradient protein 2 homolog OS=Homo sapiens GN=AGR2 PE=4 SV=1;>sp|O95994|AGR2_HUMAN Anterior gradient protein 2 homolog OS=Homo sapiens GN=AGR2 PE=1 SV=1;>tr|B2R7D7|B2R7D7_HUMAN cDNA, FLJ93394, highly similar to Homo sapiens anterior gradient 2 homolog (Xenopus laevis) (AGR2), mRNA OS=Homo sapiens PE=2 …	>tr|Q4JM47|Q4JM47_HUMAN AGR2 OS=Homo sapiens GN=AGR2 PE=2 SV=1;>tr|B5MC07|B5MC07_HUMAN Anterior gradient protein 2 homolog OS=Homo sapiens GN=AGR2 PE=4 SV=1;>sp|O95994|AGR2_HUMAN Anterior gradient protein 2 homolog OS=Homo sapiens GN=AGR2 PE=1 SV=1;>tr|B2R7D7|B2R7D7_HUMAN cDNA, FLJ93394, highly similar to Homo sapiens anterior gradient 2 homolog (Xenopus laevis) (AGR2), mRNA OS=Homo sapiens PE=2 …	>tr|Q4JM47|Q4JM47_HUMAN AGR2 OS=Homo sapiens GN=AGR2 PE=2 SV=1;>tr|B5MC07|B5MC07_HUMAN Anterior gradient protein 2 homolog OS=Homo sapiens GN=AGR2 PE=4 SV=1;>sp|O95994|AGR2_HUMAN Anterior gradient protein 2 homolog OS=Homo sapiens GN=AGR2 PE=1 SV=1;>tr|B2R	9	2	2	9.2	22.237	13634000	10843000	43336000	0	1213500	0	181270000	152340000	165930000	0	39354000	0
>sp|P00325|ADH1B_HUMAN Alcohol dehydrogenase 1B OS=Homo sapiens GN=ADH1B PE=1 SV=2;>tr|F5HB16|F5HB16_HUMAN cDNA FLJ51682, highly similar to Alcohol dehydrogenase 1B (EC 1.1.1.1) OS=Homo sapiens PE=2 SV=1;>tr|A8MYN5|A8MYN5_HUMAN Alcohol dehydrogenase 1B OS=Homo sapiens GN=ADH1B PE=3 SV=3;>tr|B4DVC3|B4DVC3_HUMAN cDNA FLJ51963, highly similar to Alcohol dehydrogenase 1B (EC 1.1.1.1) OS=Homo sapiens …	>sp|P00325|ADH1B_HUMAN Alcohol dehydrogenase 1B OS=Homo sapiens GN=ADH1B PE=1 SV=2;>tr|F5HB16|F5HB16_HUMAN cDNA FLJ51682, highly similar to Alcohol dehydrogenase 1B (EC 1.1.1.1) OS=Homo sapiens PE=2 SV=1;>tr|A8MYN5|A8MYN5_HUMAN Alcohol dehydrogenase 1B OS=Homo sapiens GN=ADH1B PE=3 SV=3;>tr|B4DVC3|B4DVC3_HUMAN cDNA FLJ51963, highly similar to Alcohol dehydrogenase 1B (EC 1.1.1.1) OS=Homo sapiens …	>sp|P00325|ADH1B_HUMAN Alcohol dehydrogenase 1B OS=Homo sapiens GN=ADH1B PE=1 SV=2;>tr|F5HB16|F5HB16_HUMAN cDNA FLJ51682, highly similar to Alcohol dehydrogenase 1B (EC 1.1.1.1) OS=Homo sapiens PE=2 SV=1;>tr|A8MYN5|A8MYN5_HUMAN Alcohol dehydrogenase 1B OS=	9	3	3	16	39.854	2038800	5944900	7026100	0	0	0	110330000	85400000	108820000	0	0	0
>sp|P00338|LDHA_HUMAN L-lactate dehydrogenase A chain OS=Homo sapiens GN=LDHA PE=1 SV=2;>tr|B4DJI1|B4DJI1_HUMAN L-lactate dehydrogenase OS=Homo sapiens PE=2 SV=1;>tr|F5H308|F5H308_HUMAN L-lactate dehydrogenase OS=Homo sapiens GN=LDHA PE=3 SV=1;>tr|F5GXY2|F5GXY2_HUMAN L-lactate dehydrogenase A chain (Fragment) OS=Homo sapiens GN=LDHA PE=3 SV=1;>tr|F5GYU2|F5GYU2_HUMAN L-lactate dehydrogenase A chai…	>sp|P00338|LDHA_HUMAN L-lactate dehydrogenase A chain OS=Homo sapiens GN=LDHA PE=1 SV=2;>tr|B4DJI1|B4DJI1_HUMAN L-lactate dehydrogenase OS=Homo sapiens PE=2 SV=1;>tr|F5H308|F5H308_HUMAN L-lactate dehydrogenase OS=Homo sapiens GN=LDHA PE=3 SV=1	>sp|P00338|LDHA_HUMAN L-lactate dehydrogenase A chain OS=Homo sapiens GN=LDHA PE=1 SV=2;>tr|B4DJI1|B4DJI1_HUMAN L-lactate dehydrogenase OS=Homo sapiens PE=2 SV=1;>tr|F5H308|F5H308_HUMAN L-lactate dehydrogenase OS=Homo sapiens GN=LDHA PE=3 SV=1	19	7	6	26.2	36.688	23475000	24154000	34022000	1037200	746680	0	501340000	502610000	455660000	174370000	63421000	0
>sp|P00352|AL1A1_HUMAN Retinal dehydrogenase 1 OS=Homo sapiens GN=ALDH1A1 PE=1 SV=2;>tr|B4DDF8|B4DDF8_HUMAN cDNA FLJ51786, highly similar to Retinal dehydrogenase 1 (EC 1.2.1.36) OS=Homo sapiens PE=2 SV=1;>tr|Q59EJ0|Q59EJ0_HUMAN Aldehyde dehydrogenase 1A1 variant (Fragment) OS=Homo sapiens PE=2 SV=1;>tr|Q5SYQ8|Q5SYQ8_HUMAN Aldehyde dehydrogenase 1 family, member A1 (Fragment) OS=Homo sapiens GN=A…	>sp|P00352|AL1A1_HUMAN Retinal dehydrogenase 1 OS=Homo sapiens GN=ALDH1A1 PE=1 SV=2;>tr|B4DDF8|B4DDF8_HUMAN cDNA FLJ51786, highly similar to Retinal dehydrogenase 1 (EC 1.2.1.36) OS=Homo sapiens PE=2 SV=1;>tr|Q59EJ0|Q59EJ0_HUMAN Aldehyde dehydrogenase 1A1 variant (Fragment) OS=Homo sapiens PE=2 SV=1;>tr|Q5SYQ8|Q5SYQ8_HUMAN Aldehyde dehydrogenase 1 family, member A1 (Fragment) OS=Homo sapiens GN=A…	>sp|P00352|AL1A1_HUMAN Retinal dehydrogenase 1 OS=Homo sapiens GN=ALDH1A1 PE=1 SV=2;>tr|B4DDF8|B4DDF8_HUMAN cDNA FLJ51786, highly similar to Retinal dehydrogenase 1 (EC 1.2.1.36) OS=Homo sapiens PE=2 SV=1;>tr|Q59EJ0|Q59EJ0_HUMAN Aldehyde dehydrogenase 1A1	7	4	4	9.4	54.861	5372300	5750600	6728800	536050	1212600	610390	153340000	154220000	144930000	44115000	68951000	55703000
>sp|P00450|CERU_HUMAN Ceruloplasmin OS=Homo sapiens GN=CP PE=1 SV=1;>tr|A5PL27|A5PL27_HUMAN CP protein OS=Homo sapiens GN=CP PE=2 SV=1;>tr|A8K5A4|A8K5A4_HUMAN cDNA FLJ76826, highly similar to Homo sapiens ceruloplasmin (ferroxidase) (CP), mRNA OS=Homo sapiens PE=2 SV=1;>tr|Q1L857|Q1L857_HUMAN Ceruloplasmin (Fragment) OS=Homo sapiens PE=2 SV=1;>tr|B7Z5Q2|B7Z5Q2_HUMAN cDNA FLJ58075, highly similar …	>sp|P00450|CERU_HUMAN Ceruloplasmin OS=Homo sapiens GN=CP PE=1 SV=1;>tr|A5PL27|A5PL27_HUMAN CP protein OS=Homo sapiens GN=CP PE=2 SV=1;>tr|A8K5A4|A8K5A4_HUMAN cDNA FLJ76826, highly similar to Homo sapiens ceruloplasmin (ferroxidase) (CP), mRNA OS=Homo sapiens PE=2 SV=1;>tr|Q1L857|Q1L857_HUMAN Ceruloplasmin (Fragment) OS=Homo sapiens PE=2 SV=1;>tr|B7Z5Q2|B7Z5Q2_HUMAN cDNA FLJ58075, highly similar …	>sp|P00450|CERU_HUMAN Ceruloplasmin OS=Homo sapiens GN=CP PE=1 SV=1;>tr|A5PL27|A5PL27_HUMAN CP protein OS=Homo sapiens GN=CP PE=2 SV=1;>tr|A8K5A4|A8K5A4_HUMAN cDNA FLJ76826, highly similar to Homo sapiens ceruloplasmin (ferroxidase) (CP), mRNA OS=Homo sapi	12	20	20	25.2	122.2	44720000	46060000	58462000	14315000	16158000	17703000	2256500000	2314300000	2291000000	1867000000	1863800000	1944400000
>sp|P00558|PGK1_HUMAN Phosphoglycerate kinase 1 OS=Homo sapiens GN=PGK1 PE=1 SV=3;>tr|B7Z7A9|B7Z7A9_HUMAN Phosphoglycerate kinase OS=Homo sapiens GN=PGK1 PE=2 SV=1;>tr|B4E1H9|B4E1H9_HUMAN cDNA FLJ53125, highly similar to Phosphoglycerate kinase 1 (EC 2.7.2.3) OS=Homo sapiens PE=2 SV=1;>tr|B4DHM5|B4DHM5_HUMAN Phosphoglycerate kinase OS=Homo sapiens PE=2 SV=1;>sp|P07205|PGK2_HUMAN Phosphoglycerate …	>sp|P00558|PGK1_HUMAN Phosphoglycerate kinase 1 OS=Homo sapiens GN=PGK1 PE=1 SV=3;>tr|B7Z7A9|B7Z7A9_HUMAN Phosphoglycerate kinase OS=Homo sapiens GN=PGK1 PE=2 SV=1;>tr|B4E1H9|B4E1H9_HUMAN cDNA FLJ53125, highly similar to Phosphoglycerate kinase 1 (EC 2.7.2.3) OS=Homo sapiens PE=2 SV=1	>sp|P00558|PGK1_HUMAN Phosphoglycerate kinase 1 OS=Homo sapiens GN=PGK1 PE=1 SV=3;>tr|B7Z7A9|B7Z7A9_HUMAN Phosphoglycerate kinase OS=Homo sapiens GN=PGK1 PE=2 SV=1;>tr|B4E1H9|B4E1H9_HUMAN cDNA FLJ53125, highly similar to Phosphoglycerate kinase 1 (EC 2.7.2	8	7	7	18	44.614	7834200	13022000	15780000	307100	939850	924290	237690000	271500000	284790000	89267000	102400000	97284000
>sp|P00734|THRB_HUMAN Prothrombin OS=Homo sapiens GN=F2 PE=1 SV=2;>tr|E9PIT3|E9PIT3_HUMAN Thrombin light chain OS=Homo sapiens GN=F2 PE=3 SV=1;>tr|B4DDT3|B4DDT3_HUMAN cDNA FLJ54622, highly similar to Prothrombin (EC 3.4.21.5) OS=Homo sapiens PE=2 SV=1;>tr|C9JV37|C9JV37_HUMAN Thrombin light chain (Fragment) OS=Homo sapiens GN=F2 PE=4 SV=1;>tr|Q69EZ8|Q69EZ8_HUMAN Prothrombin (Fragment) OS=Homo sapi…	>sp|P00734|THRB_HUMAN Prothrombin OS=Homo sapiens GN=F2 PE=1 SV=2;>tr|E9PIT3|E9PIT3_HUMAN Thrombin light chain OS=Homo sapiens GN=F2 PE=3 SV=1;>tr|B4DDT3|B4DDT3_HUMAN cDNA FLJ54622, highly similar to Prothrombin (EC 3.4.21.5) OS=Homo sapiens PE=2 SV=1;>tr|C9JV37|C9JV37_HUMAN Thrombin light chain (Fragment) OS=Homo sapiens GN=F2 PE=4 SV=1	>sp|P00734|THRB_HUMAN Prothrombin OS=Homo sapiens GN=F2 PE=1 SV=2;>tr|E9PIT3|E9PIT3_HUMAN Thrombin light chain OS=Homo sapiens GN=F2 PE=3 SV=1;>tr|B4DDT3|B4DDT3_HUMAN cDNA FLJ54622, highly similar to Prothrombin (EC 3.4.21.5) OS=Homo sapiens PE=2 SV=1;>tr|	7	6	6	14	70.036	1026800	4367800	5380300	0	0	0	146150000	131580000	164330000	0	0	0
>sp|P00738|HPT_HUMAN Haptoglobin OS=Homo sapiens GN=HP PE=1 SV=1;>tr|J3QR68|J3QR68_HUMAN Haptoglobin (Fragment) OS=Homo sapiens GN=HP PE=3 SV=1;>tr|Q0VAC5|Q0VAC5_HUMAN HP protein OS=Homo sapiens GN=HP PE=2 SV=1;>tr|J3QLC9|J3QLC9_HUMAN Haptoglobin (Fragment) OS=Homo sapiens GN=HP PE=3 SV=1;>sp|P00739|HPTR_HUMAN Haptoglobin-related protein OS=Homo sapiens GN=HPR PE=1 SV=2;>tr|Q6NSB4|Q6NSB4_HUMAN HP…	>sp|P00738|HPT_HUMAN Haptoglobin OS=Homo sapiens GN=HP PE=1 SV=1;>tr|J3QR68|J3QR68_HUMAN Haptoglobin (Fragment) OS=Homo sapiens GN=HP PE=3 SV=1;>tr|Q0VAC5|Q0VAC5_HUMAN HP protein OS=Homo sapiens GN=HP PE=2 SV=1;>tr|J3QLC9|J3QLC9_HUMAN Haptoglobin (Fragment) OS=Homo sapiens GN=HP PE=3 SV=1;>sp|P00739|HPTR_HUMAN Haptoglobin-related protein OS=Homo sapiens GN=HPR PE=1 SV=2;>tr|Q6NSB4|Q6NSB4_HUMAN HP…	>sp|P00738|HPT_HUMAN Haptoglobin OS=Homo sapiens GN=HP PE=1 SV=1;>tr|J3QR68|J3QR68_HUMAN Haptoglobin (Fragment) OS=Homo sapiens GN=HP PE=3 SV=1;>tr|Q0VAC5|Q0VAC5_HUMAN HP protein OS=Homo sapiens GN=HP PE=2 SV=1;>tr|J3QLC9|J3QLC9_HUMAN Haptoglobin (Fragment	16	27	27	56.9	45.205	554180000	597570000	681210000	256890000	246150000	255800000	13230000000	13802000000	14475000000	12638000000	12260000000	12279000000
>sp|P00747|PLMN_HUMAN Plasminogen OS=Homo sapiens GN=PLG PE=1 SV=2;>tr|B2R7F8|B2R7F8_HUMAN cDNA, FLJ93426, highly similar to Homo sapiens plasminogen (PLG), mRNA OS=Homo sapiens PE=2 SV=1;>tr|B4DPH4|B4DPH4_HUMAN cDNA FLJ58778, highly similar to Plasminogen (EC 3.4.21.7) OS=Homo sapiens PE=2 SV=1;>tr|Q68DS2|Q68DS2_HUMAN Putative uncharacterized protein DKFZp779M0222 (Fragment) OS=Homo sapiens GN=D…	>sp|P00747|PLMN_HUMAN Plasminogen OS=Homo sapiens GN=PLG PE=1 SV=2;>tr|B2R7F8|B2R7F8_HUMAN cDNA, FLJ93426, highly similar to Homo sapiens plasminogen (PLG), mRNA OS=Homo sapiens PE=2 SV=1;>tr|B4DPH4|B4DPH4_HUMAN cDNA FLJ58778, highly similar to Plasminogen (EC 3.4.21.7) OS=Homo sapiens PE=2 SV=1	>sp|P00747|PLMN_HUMAN Plasminogen OS=Homo sapiens GN=PLG PE=1 SV=2;>tr|B2R7F8|B2R7F8_HUMAN cDNA, FLJ93426, highly similar to Homo sapiens plasminogen (PLG), mRNA OS=Homo sapiens PE=2 SV=1;>tr|B4DPH4|B4DPH4_HUMAN cDNA FLJ58778, highly similar to Plasminogen	7	13	13	22.2	90.568	8521400	12098000	14098000	453600	965990	1152100	542890000	526220000	545080000	56949000	182940000	184470000
>tr|B4E1Z4|B4E1Z4_HUMAN Complement factor B OS=Homo sapiens GN=CFB PE=2 SV=1;>tr|E7EVA3|E7EVA3_HUMAN Complement factor B OS=Homo sapiens GN=CFB PE=4 SV=1;>sp|P00751|CFAB_HUMAN Complement factor B OS=Homo sapiens GN=CFB PE=1 SV=2;>tr|Q53F89|Q53F89_HUMAN Complement factor B (Fragment) OS=Homo sapiens GN=CFB PE=2 SV=1;>tr|E7ETN3|E7ETN3_HUMAN Uncharacterized protein OS=Homo sapiens PE=3 SV=1;>tr|B0UX…	>tr|B4E1Z4|B4E1Z4_HUMAN Complement factor B OS=Homo sapiens GN=CFB PE=2 SV=1;>tr|E7EVA3|E7EVA3_HUMAN Complement factor B OS=Homo sapiens GN=CFB PE=4 SV=1;>sp|P00751|CFAB_HUMAN Complement factor B OS=Homo sapiens GN=CFB PE=1 SV=2;>tr|Q53F89|Q53F89_HUMAN Complement factor B (Fragment) OS=Homo sapiens GN=CFB PE=2 SV=1;>tr|E7ETN3|E7ETN3_HUMAN Uncharacterized protein OS=Homo sapiens PE=3 SV=1;>tr|B0UX…	>tr|B4E1Z4|B4E1Z4_HUMAN Complement factor B OS=Homo sapiens GN=CFB PE=2 SV=1;>tr|E7EVA3|E7EVA3_HUMAN Complement factor B OS=Homo sapiens GN=CFB PE=4 SV=1;>sp|P00751|CFAB_HUMAN Complement factor B OS=Homo sapiens GN=CFB PE=1 SV=2;>tr|Q53F89|Q53F89_HUMAN Com	12	15	15	15.2	140.94	14195000	16921000	21681000	1131500	1076300	1069300	1205400000	1197000000	1258200000	275310000	269910000	273180000
>sp|P01008|ANT3_HUMAN Antithrombin-III OS=Homo sapiens GN=SERPINC1 PE=1 SV=1;>tr|Q8TCE1|Q8TCE1_HUMAN SERPINC1 protein OS=Homo sapiens GN=SERPINC1 PE=2 SV=1;CON__P41361;>tr|Q9UE54|Q9UE54_HUMAN Gene for antithrombin-III (aa 262-353) OS=Homo sapiens PE=2 SV=1;>tr|Q8IZZ8|Q8IZZ8_HUMAN Antithrombin (Fragment) OS=Homo sapiens GN=AT3 PE=2 SV=1;>tr|Q8IZZ9|Q8IZZ9_HUMAN Antithrombin (Fragment) OS=Homo sapie…	>sp|P01008|ANT3_HUMAN Antithrombin-III OS=Homo sapiens GN=SERPINC1 PE=1 SV=1	>sp|P01008|ANT3_HUMAN Antithrombin-III OS=Homo sapiens GN=SERPINC1 PE=1 SV=1	8	11	11	26.9	52.602	29102000	34322000	40715000	839650	1655700	1396900	860290000	968230000	868230000	71345000	179590000	152350000
>sp|P01009|A1AT_HUMAN Alpha-1-antitrypsin OS=Homo sapiens GN=SERPINA1 PE=1 SV=3;>tr|E9KL23|E9KL23_HUMAN Epididymis secretory sperm binding protein Li 44a OS=Homo sapiens PE=2 SV=1;>tr|Q13747|Q13747_HUMAN Alpha-1 antitrypsin (Fragment) OS=Homo sapiens PE=2 SV=1;>tr|Q9P173|Q9P173_HUMAN PRO2275 OS=Homo sapiens PE=2 SV=1;>tr|G3V2B9|G3V2B9_HUMAN Short peptide from AAT (Fragment) OS=Homo sapiens GN=SER…	>sp|P01009|A1AT_HUMAN Alpha-1-antitrypsin OS=Homo sapiens GN=SERPINA1 PE=1 SV=3;>tr|E9KL23|E9KL23_HUMAN Epididymis secretory sperm binding protein Li 44a OS=Homo sapiens PE=2 SV=1;>tr|Q13747|Q13747_HUMAN Alpha-1 antitrypsin (Fragment) OS=Homo sapiens PE=2 SV=1	>sp|P01009|A1AT_HUMAN Alpha-1-antitrypsin OS=Homo sapiens GN=SERPINA1 PE=1 SV=3;>tr|E9KL23|E9KL23_HUMAN Epididymis secretory sperm binding protein Li 44a OS=Homo sapiens PE=2 SV=1;>tr|Q13747|Q13747_HUMAN Alpha-1 antitrypsin (Fragment) OS=Homo sapiens PE=2	17	20	20	54.5	46.736	635280000	655790000	731940000	63870000	56339000	64827000	15759000000	15740000000	15884000000	2895600000	2907100000	2904300000
>tr|B3KS79|B3KS79_HUMAN cDNA FLJ35730 fis, clone TESTI2003131, highly similar to ALPHA-1-ANTICHYMOTRYPSIN OS=Homo sapiens PE=2 SV=1;>tr|G3V5I3|G3V5I3_HUMAN Alpha-1-antichymotrypsin OS=Homo sapiens GN=SERPINA3 PE=3 SV=1;>sp|P01011|AACT_HUMAN Alpha-1-antichymotrypsin OS=Homo sapiens GN=SERPINA3 PE=1 SV=2;>tr|G3V3A0|G3V3A0_HUMAN Alpha-1-antichymotrypsin OS=Homo sapiens GN=SERPINA3 PE=3 SV=1;>tr|G3V5…	>tr|B3KS79|B3KS79_HUMAN cDNA FLJ35730 fis, clone TESTI2003131, highly similar to ALPHA-1-ANTICHYMOTRYPSIN OS=Homo sapiens PE=2 SV=1;>tr|G3V5I3|G3V5I3_HUMAN Alpha-1-antichymotrypsin OS=Homo sapiens GN=SERPINA3 PE=3 SV=1;>sp|P01011|AACT_HUMAN Alpha-1-antichymotrypsin OS=Homo sapiens GN=SERPINA3 PE=1 SV=2;>tr|G3V3A0|G3V3A0_HUMAN Alpha-1-antichymotrypsin OS=Homo sapiens GN=SERPINA3 PE=3 SV=1;>tr|G3V5…	>tr|B3KS79|B3KS79_HUMAN cDNA FLJ35730 fis, clone TESTI2003131, highly similar to ALPHA-1-ANTICHYMOTRYPSIN OS=Homo sapiens PE=2 SV=1;>tr|G3V5I3|G3V5I3_HUMAN Alpha-1-antichymotrypsin OS=Homo sapiens GN=SERPINA3 PE=3 SV=1;>sp|P01011|AACT_HUMAN Alpha-1-antichy	5	9	9	25.9	50.628	68331000	76358000	87912000	16060000	12844000	15586000	1529800000	1612900000	1501600000	1120100000	924470000	991680000
>tr|Q59EP2|Q59EP2_HUMAN Angiotensinogen variant (Fragment) OS=Homo sapiens PE=2 SV=1;>sp|P01019|ANGT_HUMAN Angiotensinogen OS=Homo sapiens GN=AGT PE=1 SV=1;>tr|B0ZBE2|B0ZBE2_HUMAN Angiotensinogen (Serpin peptidase inhibitor, clade A, member 8) OS=Homo sapiens GN=AGT PE=3 SV=1;>tr|B2R5S1|B2R5S1_HUMAN cDNA, FLJ92595, highly similar to Homo sapiens angiotensinogen (serine (or cysteine) proteinaseinh…	>tr|Q59EP2|Q59EP2_HUMAN Angiotensinogen variant (Fragment) OS=Homo sapiens PE=2 SV=1;>sp|P01019|ANGT_HUMAN Angiotensinogen OS=Homo sapiens GN=AGT PE=1 SV=1;>tr|B0ZBE2|B0ZBE2_HUMAN Angiotensinogen (Serpin peptidase inhibitor, clade A, member 8) OS=Homo sapiens GN=AGT PE=3 SV=1;>tr|B2R5S1|B2R5S1_HUMAN cDNA, FLJ92595, highly similar to Homo sapiens angiotensinogen (serine (or cysteine) proteinaseinh…	>tr|Q59EP2|Q59EP2_HUMAN Angiotensinogen variant (Fragment) OS=Homo sapiens PE=2 SV=1;>sp|P01019|ANGT_HUMAN Angiotensinogen OS=Homo sapiens GN=AGT PE=1 SV=1;>tr|B0ZBE2|B0ZBE2_HUMAN Angiotensinogen (Serpin peptidase inhibitor, clade A, member 8) OS=Homo sapi	12	4	4	10.2	53.777	2589700	6579800	6078000	0	0	0	147250000	121100000	103920000	0	0	0
>sp|P01023|A2MG_HUMAN Alpha-2-macroglobulin OS=Homo sapiens GN=A2M PE=1 SV=3;CON__ENSEMBL:ENSBTAP00000024146;>sp|P20742|PZP_HUMAN Pregnancy zone protein OS=Homo sapiens GN=PZP PE=1 SV=4;>tr|B2R950|B2R950_HUMAN cDNA, FLJ94213, highly similar to Homo sapiens pregnancy-zone protein (PZP), mRNA OS=Homo sapiens PE=2 SV=1;>tr|H0YGH6|H0YGH6_HUMAN Alpha-2-macroglobulin (Fragment) OS=Homo sapiens GN=A2M P…	>sp|P01023|A2MG_HUMAN Alpha-2-macroglobulin OS=Homo sapiens GN=A2M PE=1 SV=3	>sp|P01023|A2MG_HUMAN Alpha-2-macroglobulin OS=Homo sapiens GN=A2M PE=1 SV=3	9	44	44	40.8	163.29	67710000	77414000	93561000	7851200	5872100	9061100	5425800000	5652200000	5574200000	1432600000	1394900000	1457200000
>sp|P01024|CO3_HUMAN Complement C3 OS=Homo sapiens GN=C3 PE=1 SV=2;>tr|B4E216|B4E216_HUMAN cDNA FLJ57339, highly similar to Complement C3 OS=Homo sapiens PE=2 SV=1;CON__Q2UVX4;>tr|B4DR57|B4DR57_HUMAN cDNA FLJ60818, highly similar to Complement C3 OS=Homo sapiens PE=2 SV=1	>sp|P01024|CO3_HUMAN Complement C3 OS=Homo sapiens GN=C3 PE=1 SV=2;>tr|B4E216|B4E216_HUMAN cDNA FLJ57339, highly similar to Complement C3 OS=Homo sapiens PE=2 SV=1	>sp|P01024|CO3_HUMAN Complement C3 OS=Homo sapiens GN=C3 PE=1 SV=2;>tr|B4E216|B4E216_HUMAN cDNA FLJ57339, highly similar to Complement C3 OS=Homo sapiens PE=2 SV=1	4	65	65	49.2	187.15	139170000	149670000	164130000	25449000	22076000	23159000	14406000000	14566000000	14190000000	6520500000	6481500000	6990300000
>sp|P01031|CO5_HUMAN Complement C5 OS=Homo sapiens GN=C5 PE=1 SV=4	>sp|P01031|CO5_HUMAN Complement C5 OS=Homo sapiens GN=C5 PE=1 SV=4	>sp|P01031|CO5_HUMAN Complement C5 OS=Homo sapiens GN=C5 PE=1 SV=4	1	1	1	0.7	188.3	0	377640	537940	0	0	0	0	33620000	40413000	0	0	0
>sp|P01033|TIMP1_HUMAN Metalloproteinase inhibitor 1 OS=Homo sapiens GN=TIMP1 PE=1 SV=1;>tr|B3KQF4|B3KQF4_HUMAN cDNA FLJ90373 fis, clone NT2RP2004606, highly similar to Metalloproteinase inhibitor 1 OS=Homo sapiens PE=2 SV=1;>tr|Q6FGX5|Q6FGX5_HUMAN TIMP metallopeptidase inhibitor 1 OS=Homo sapiens GN=TIMP1 PE=2 SV=1;>tr|Q58P21|Q58P21_HUMAN Tissue inhibitor of metalloproteinase 1 (Fragment) OS=Hom…	>sp|P01033|TIMP1_HUMAN Metalloproteinase inhibitor 1 OS=Homo sapiens GN=TIMP1 PE=1 SV=1;>tr|B3KQF4|B3KQF4_HUMAN cDNA FLJ90373 fis, clone NT2RP2004606, highly similar to Metalloproteinase inhibitor 1 OS=Homo sapiens PE=2 SV=1;>tr|Q6FGX5|Q6FGX5_HUMAN TIMP metallopeptidase inhibitor 1 OS=Homo sapiens GN=TIMP1 PE=2 SV=1;>tr|Q58P21|Q58P21_HUMAN Tissue inhibitor of metalloproteinase 1 (Fragment) OS=Hom…	>sp|P01033|TIMP1_HUMAN Metalloproteinase inhibitor 1 OS=Homo sapiens GN=TIMP1 PE=1 SV=1;>tr|B3KQF4|B3KQF4_HUMAN cDNA FLJ90373 fis, clone NT2RP2004606, highly similar to Metalloproteinase inhibitor 1 OS=Homo sapiens PE=2 SV=1;>tr|Q6FGX5|Q6FGX5_HUMAN TIMP me	7	2	2	10.1	23.171	0	5267000	5826900	6256600	4130500	3866000	0	62690000	62106000	168220000	84900000	80218000
>sp|P01034|CYTC_HUMAN Cystatin-C OS=Homo sapiens GN=CST3 PE=1 SV=1	>sp|P01034|CYTC_HUMAN Cystatin-C OS=Homo sapiens GN=CST3 PE=1 SV=1	>sp|P01034|CYTC_HUMAN Cystatin-C OS=Homo sapiens GN=CST3 PE=1 SV=1	1	4	4	30.8	15.799	68165000	70199000	86233000	94172000	82286000	85464000	409270000	443650000	501090000	1665300000	1491100000	1507600000
>sp|P01036|CYTS_HUMAN Cystatin-S OS=Homo sapiens GN=CST4 PE=1 SV=3	>sp|P01036|CYTS_HUMAN Cystatin-S OS=Homo sapiens GN=CST4 PE=1 SV=3	>sp|P01036|CYTS_HUMAN Cystatin-S OS=Homo sapiens GN=CST4 PE=1 SV=3	1	9	4	72.3	16.214	1303200000	1326000000	1466700000	2245600000	1999500000	2212800000	9605200000	9307400000	9834200000	43928000000	40969000000	44004000000
>sp|P01037|CYTN_HUMAN Cystatin-SN OS=Homo sapiens GN=CST1 PE=1 SV=3	>sp|P01037|CYTN_HUMAN Cystatin-SN OS=Homo sapiens GN=CST1 PE=1 SV=3	>sp|P01037|CYTN_HUMAN Cystatin-SN OS=Homo sapiens GN=CST1 PE=1 SV=3	1	4	1	34	16.387	56710000	55978000	54691000	34436000	31648000	28448000	340260000	354920000	307620000	484540000	469280000	402350000
>sp|P01042|KNG1_HUMAN Kininogen-1 OS=Homo sapiens GN=KNG1 PE=1 SV=2;>tr|B4E1C2|B4E1C2_HUMAN Kininogen 1, isoform CRA_b OS=Homo sapiens GN=KNG1 PE=2 SV=1;>tr|D3DNU8|D3DNU8_HUMAN Kininogen 1, isoform CRA_a OS=Homo sapiens GN=KNG1 PE=4 SV=1;>tr|B4DPP8|B4DPP8_HUMAN cDNA FLJ53075, highly similar to Kininogen-1 OS=Homo sapiens PE=2 SV=1;>tr|C9JEX1|C9JEX1_HUMAN Lysyl-bradykinin OS=Homo sapiens GN=KNG1 P…	>sp|P01042|KNG1_HUMAN Kininogen-1 OS=Homo sapiens GN=KNG1 PE=1 SV=2;>tr|B4E1C2|B4E1C2_HUMAN Kininogen 1, isoform CRA_b OS=Homo sapiens GN=KNG1 PE=2 SV=1;>tr|D3DNU8|D3DNU8_HUMAN Kininogen 1, isoform CRA_a OS=Homo sapiens GN=KNG1 PE=4 SV=1;>tr|B4DPP8|B4DPP8_HUMAN cDNA FLJ53075, highly similar to Kininogen-1 OS=Homo sapiens PE=2 SV=1;>tr|C9JEX1|C9JEX1_HUMAN Lysyl-bradykinin OS=Homo sapiens GN=KNG1 P…	>sp|P01042|KNG1_HUMAN Kininogen-1 OS=Homo sapiens GN=KNG1 PE=1 SV=2;>tr|B4E1C2|B4E1C2_HUMAN Kininogen 1, isoform CRA_b OS=Homo sapiens GN=KNG1 PE=2 SV=1;>tr|D3DNU8|D3DNU8_HUMAN Kininogen 1, isoform CRA_a OS=Homo sapiens GN=KNG1 PE=4 SV=1;>tr|B4DPP8|B4DPP8_	6	8	8	17.1	71.957	20713000	17843000	24215000	449970	293950	408760	809960000	742540000	722920000	97261000	66955000	88808000
>sp|P01591|IGJ_HUMAN Immunoglobulin J chain OS=Homo sapiens GN=IGJ PE=1 SV=4;>tr|D6RD17|D6RD17_HUMAN Immunoglobulin J chain (Fragment) OS=Homo sapiens GN=IGJ PE=4 SV=1;>tr|D6RHJ6|D6RHJ6_HUMAN Immunoglobulin J chain (Fragment) OS=Homo sapiens GN=IGJ PE=4 SV=1;>tr|C9JA05|C9JA05_HUMAN Immunoglobulin J chain (Fragment) OS=Homo sapiens GN=IGJ PE=4 SV=1	>sp|P01591|IGJ_HUMAN Immunoglobulin J chain OS=Homo sapiens GN=IGJ PE=1 SV=4;>tr|D6RD17|D6RD17_HUMAN Immunoglobulin J chain (Fragment) OS=Homo sapiens GN=IGJ PE=4 SV=1;>tr|D6RHJ6|D6RHJ6_HUMAN Immunoglobulin J chain (Fragment) OS=Homo sapiens GN=IGJ PE=4 SV=1;>tr|C9JA05|C9JA05_HUMAN Immunoglobulin J chain (Fragment) OS=Homo sapiens GN=IGJ PE=4 SV=1	>sp|P01591|IGJ_HUMAN Immunoglobulin J chain OS=Homo sapiens GN=IGJ PE=1 SV=4;>tr|D6RD17|D6RD17_HUMAN Immunoglobulin J chain (Fragment) OS=Homo sapiens GN=IGJ PE=4 SV=1;>tr|D6RHJ6|D6RHJ6_HUMAN Immunoglobulin J chain (Fragment) OS=Homo sapiens GN=IGJ PE=4 SV	4	5	5	32.7	18.098	700890000	820590000	941020000	708780000	672090000	654590000	6307300000	6648500000	7029700000	14071000000	14358000000	12432000000
>tr|A0N5G1|A0N5G1_HUMAN Rheumatoid factor C6 light chain (Fragment) OS=Homo sapiens GN=V<kappa>1 PE=2 SV=1;>sp|P01598|KV106_HUMAN Ig kappa chain V-I region EU OS=Homo sapiens PE=1 SV=1;>sp|P01596|KV104_HUMAN Ig kappa chain V-I region CAR OS=Homo sapiens PE=1 SV=1	>tr|A0N5G1|A0N5G1_HUMAN Rheumatoid factor C6 light chain (Fragment) OS=Homo sapiens GN=V<kappa>1 PE=2 SV=1;>sp|P01598|KV106_HUMAN Ig kappa chain V-I region EU OS=Homo sapiens PE=1 SV=1;>sp|P01596|KV104_HUMAN Ig kappa chain V-I region CAR OS=Homo sapiens PE=1 SV=1	>tr|A0N5G1|A0N5G1_HUMAN Rheumatoid factor C6 light chain (Fragment) OS=Homo sapiens GN=V<kappa>1 PE=2 SV=1;>sp|P01598|KV106_HUMAN Ig kappa chain V-I region EU OS=Homo sapiens PE=1 SV=1;>sp|P01596|KV104_HUMAN Ig kappa chain V-I region CAR OS=Homo sapiens PE	3	2	2	25	12.528	94668000	80513000	101690000	41854000	39605000	41314000	378530000	339850000	381060000	405560000	406250000	400220000
>sp|P01611|KV119_HUMAN Ig kappa chain V-I region Wes OS=Homo sapiens PE=1 SV=1	>sp|P01611|KV119_HUMAN Ig kappa chain V-I region Wes OS=Homo sapiens PE=1 SV=1	>sp|P01611|KV119_HUMAN Ig kappa chain V-I region Wes OS=Homo sapiens PE=1 SV=1	1	1	1	16.7	11.608	0	5573200	0	0	0	0	0	29777000	0	0	0	0
>sp|P01613|KV121_HUMAN Ig kappa chain V-I region Ni OS=Homo sapiens PE=1 SV=1	>sp|P01613|KV121_HUMAN Ig kappa chain V-I region Ni OS=Homo sapiens PE=1 SV=1	>sp|P01613|KV121_HUMAN Ig kappa chain V-I region Ni OS=Homo sapiens PE=1 SV=1	1	2	2	30.4	11.745	11375000	13537000	13168000	0	0	0	0	42361000	37273000	0	0	0
>sp|P06309|KV205_HUMAN Ig kappa chain V-II region GM607 (Fragment) OS=Homo sapiens PE=4 SV=1;>sp|P01617|KV204_HUMAN Ig kappa chain V-II region TEW OS=Homo sapiens PE=1 SV=1;>tr|A2NB45|A2NB45_HUMAN Cold agglutinin FS-1 L-chain (Fragment) OS=Homo sapiens PE=2 SV=1;>tr|A2IPI1|A2IPI1_HUMAN HRV Fab N8-VL (Fragment) OS=Homo sapiens PE=2 SV=1;>sp|P01614|KV201_HUMAN Ig kappa chain V-II region Cum OS=Homo…	>sp|P06309|KV205_HUMAN Ig kappa chain V-II region GM607 (Fragment) OS=Homo sapiens PE=4 SV=1;>sp|P01617|KV204_HUMAN Ig kappa chain V-II region TEW OS=Homo sapiens PE=1 SV=1;>tr|A2NB45|A2NB45_HUMAN Cold agglutinin FS-1 L-chain (Fragment) OS=Homo sapiens PE=2 SV=1;>tr|A2IPI1|A2IPI1_HUMAN HRV Fab N8-VL (Fragment) OS=Homo sapiens PE=2 SV=1;>sp|P01614|KV201_HUMAN Ig kappa chain V-II region Cum OS=Homo…	>sp|P06309|KV205_HUMAN Ig kappa chain V-II region GM607 (Fragment) OS=Homo sapiens PE=4 SV=1;>sp|P01617|KV204_HUMAN Ig kappa chain V-II region TEW OS=Homo sapiens PE=1 SV=1;>tr|A2NB45|A2NB45_HUMAN Cold agglutinin FS-1 L-chain (Fragment) OS=Homo sapiens PE=	6	3	2	37.6	12.664	14141000	21127000	18669000	9689100	13251000	8660800	87978000	118690000	99606000	141370000	203740000	127020000
>sp|P18135|KV312_HUMAN Ig kappa chain V-III region HAH OS=Homo sapiens PE=2 SV=1;>sp|P18136|KV313_HUMAN Ig kappa chain V-III region HIC OS=Homo sapiens PE=2 SV=2;>sp|P01620|KV302_HUMAN Ig kappa chain V-III region SIE OS=Homo sapiens PE=1 SV=1;>sp|P01623|KV305_HUMAN Ig kappa chain V-III region WOL OS=Homo sapiens PE=1 SV=1;>tr|Q9UL78|Q9UL78_HUMAN Myosin-reactive immunoglobulin light chain variable…	>sp|P18135|KV312_HUMAN Ig kappa chain V-III region HAH OS=Homo sapiens PE=2 SV=1;>sp|P18136|KV313_HUMAN Ig kappa chain V-III region HIC OS=Homo sapiens PE=2 SV=2;>sp|P01620|KV302_HUMAN Ig kappa chain V-III region SIE OS=Homo sapiens PE=1 SV=1;>sp|P01623|KV305_HUMAN Ig kappa chain V-III region WOL OS=Homo sapiens PE=1 SV=1;>tr|Q9UL78|Q9UL78_HUMAN Myosin-reactive immunoglobulin light chain variable…	>sp|P18135|KV312_HUMAN Ig kappa chain V-III region HAH OS=Homo sapiens PE=2 SV=1;>sp|P18136|KV313_HUMAN Ig kappa chain V-III region HIC OS=Homo sapiens PE=2 SV=2;>sp|P01620|KV302_HUMAN Ig kappa chain V-III region SIE OS=Homo sapiens PE=1 SV=1;>sp|P01623|KV	17	4	1	38.8	14.073	122150000	116920000	122170000	39021000	36375000	40158000	732900000	741310000	687170000	549050000	539380000	567970000
>sp|P01625|KV402_HUMAN Ig kappa chain V-IV region Len OS=Homo sapiens PE=1 SV=2	>sp|P01625|KV402_HUMAN Ig kappa chain V-IV region Len OS=Homo sapiens PE=1 SV=2	>sp|P01625|KV402_HUMAN Ig kappa chain V-IV region Len OS=Homo sapiens PE=1 SV=2	1	1	1	15.8	12.64	0	16701000	16954000	0	3693800	4214900	0	92300000	72106000	0	47573000	50693000
>sp|P01714|LV301_HUMAN Ig lambda chain V-III region SH OS=Homo sapiens PE=1 SV=1;>tr|Q5NV73|Q5NV73_HUMAN V2-13 protein (Fragment) OS=Homo sapiens GN=V2-13 PE=2 SV=1;>tr|Q9NSD6|Q9NSD6_HUMAN This CDS feature is included to show the translation of the corresponding V_region. Presently translation qualifiers on V_region features are illegal. (Fragment) OS=Homo sapiens GN=IGLV3-19 PE=2 SV=1;>tr|A2N2W9…	>sp|P01714|LV301_HUMAN Ig lambda chain V-III region SH OS=Homo sapiens PE=1 SV=1;>tr|Q5NV73|Q5NV73_HUMAN V2-13 protein (Fragment) OS=Homo sapiens GN=V2-13 PE=2 SV=1;>tr|Q9NSD6|Q9NSD6_HUMAN This CDS feature is included to show the translation of the corresponding V_region. Presently translation qualifiers on V_region features are illegal. (Fragment) OS=Homo sapiens GN=IGLV3-19 PE=2 SV=1;>tr|A2N2W9…	>sp|P01714|LV301_HUMAN Ig lambda chain V-III region SH OS=Homo sapiens PE=1 SV=1;>tr|Q5NV73|Q5NV73_HUMAN V2-13 protein (Fragment) OS=Homo sapiens GN=V2-13 PE=2 SV=1;>tr|Q9NSD6|Q9NSD6_HUMAN This CDS feature is included to show the translation of the corresp	6	4	2	34.3	11.392	0	19230000	19095000	6433600	11448000	13200000	0	126540000	99828000	157350000	195730000	230480000
>tr|Q9UL92|Q9UL92_HUMAN Myosin-reactive immunoglobulin heavy chain variable region (Fragment) OS=Homo sapiens PE=2 SV=1;>tr|A2N7P4|A2N7P4_HUMAN Immunoglobulin mu-chain D-J4-region (Fragment) OS=Homo sapiens GN=IGHM PE=4 SV=1;>sp|P01743|HV102_HUMAN Ig heavy chain V-I region HG3 OS=Homo sapiens PE=4 SV=1;>tr|A2J1M2|A2J1M2_HUMAN Rheumatoid factor RF-IP9 (Fragment) OS=Homo sapiens PE=2 SV=1;>tr|A2J1M…	>tr|Q9UL92|Q9UL92_HUMAN Myosin-reactive immunoglobulin heavy chain variable region (Fragment) OS=Homo sapiens PE=2 SV=1;>tr|A2N7P4|A2N7P4_HUMAN Immunoglobulin mu-chain D-J4-region (Fragment) OS=Homo sapiens GN=IGHM PE=4 SV=1;>sp|P01743|HV102_HUMAN Ig heavy chain V-I region HG3 OS=Homo sapiens PE=4 SV=1;>tr|A2J1M2|A2J1M2_HUMAN Rheumatoid factor RF-IP9 (Fragment) OS=Homo sapiens PE=2 SV=1;>tr|A2J1M…	>tr|Q9UL92|Q9UL92_HUMAN Myosin-reactive immunoglobulin heavy chain variable region (Fragment) OS=Homo sapiens PE=2 SV=1;>tr|A2N7P4|A2N7P4_HUMAN Immunoglobulin mu-chain D-J4-region (Fragment) OS=Homo sapiens GN=IGHM PE=4 SV=1;>sp|P01743|HV102_HUMAN Ig heavy	5	2	1	14.5	13.58	21982000	21197000	25705000	20477000	15543000	18855000	143830000	146560000	157670000	353380000	291820000	330690000
>sp|P01767|HV306_HUMAN Ig heavy chain V-III region BUT OS=Homo sapiens PE=1 SV=1	>sp|P01767|HV306_HUMAN Ig heavy chain V-III region BUT OS=Homo sapiens PE=1 SV=1	>sp|P01767|HV306_HUMAN Ig heavy chain V-III region BUT OS=Homo sapiens PE=1 SV=1	1	2	1	26.1	11.906	2002700	905530	0	0	0	0	0	0	0	0	0	0
>sp|P01771|HV310_HUMAN Ig heavy chain V-III region HIL OS=Homo sapiens PE=1 SV=1	>sp|P01771|HV310_HUMAN Ig heavy chain V-III region HIL OS=Homo sapiens PE=1 SV=1	>sp|P01771|HV310_HUMAN Ig heavy chain V-III region HIL OS=Homo sapiens PE=1 SV=1	1	1	1	9.1	13.437	8247200	12808000	15691000	10372000	8179100	7676500	57730000	94742000	102970000	170270000	141490000	126670000
>sp|P01833|PIGR_HUMAN Polymeric immunoglobulin receptor OS=Homo sapiens GN=PIGR PE=1 SV=4	>sp|P01833|PIGR_HUMAN Polymeric immunoglobulin receptor OS=Homo sapiens GN=PIGR PE=1 SV=4	>sp|P01833|PIGR_HUMAN Polymeric immunoglobulin receptor OS=Homo sapiens GN=PIGR PE=1 SV=4	1	27	27	45.5	83.283	771560000	756320000	858460000	511070000	471290000	513710000	29870000000	31058000000	30698000000	49952000000	49124000000	48638000000
>tr|Q6N093|Q6N093_HUMAN Putative uncharacterized protein DKFZp686I04196 (Fragment) OS=Homo sapiens GN=DKFZp686I04196 PE=1 SV=1;>sp|P01859|IGHG2_HUMAN Ig gamma-2 chain C region OS=Homo sapiens GN=IGHG2 PE=1 SV=2;>tr|Q68CN4|Q68CN4_HUMAN Putative uncharacterized protein DKFZp686E23209 OS=Homo sapiens GN=DKFZp686E23209 PE=1 SV=2	>tr|Q6N093|Q6N093_HUMAN Putative uncharacterized protein DKFZp686I04196 (Fragment) OS=Homo sapiens GN=DKFZp686I04196 PE=1 SV=1;>sp|P01859|IGHG2_HUMAN Ig gamma-2 chain C region OS=Homo sapiens GN=IGHG2 PE=1 SV=2;>tr|Q68CN4|Q68CN4_HUMAN Putative uncharacterized protein DKFZp686E23209 OS=Homo sapiens GN=DKFZp686E23209 PE=1 SV=2	>tr|Q6N093|Q6N093_HUMAN Putative uncharacterized protein DKFZp686I04196 (Fragment) OS=Homo sapiens GN=DKFZp686I04196 PE=1 SV=1;>sp|P01859|IGHG2_HUMAN Ig gamma-2 chain C region OS=Homo sapiens GN=IGHG2 PE=1 SV=2;>tr|Q68CN4|Q68CN4_HUMAN Putative uncharacteri	3	11	0	35.7	46.06	236440000	106370000	225260000	14587000	259660000	7743900	5761300000	4813800000	4067200000	1273300000	4270900000	1341300000
>sp|P01861|IGHG4_HUMAN Ig gamma-4 chain C region OS=Homo sapiens GN=IGHG4 PE=1 SV=1;>tr|O95978|O95978_HUMAN VH1 protein (Fragment) OS=Homo sapiens GN=VH1 PE=1 SV=1	>sp|P01861|IGHG4_HUMAN Ig gamma-4 chain C region OS=Homo sapiens GN=IGHG4 PE=1 SV=1	>sp|P01861|IGHG4_HUMAN Ig gamma-4 chain C region OS=Homo sapiens GN=IGHG4 PE=1 SV=1	2	9	0	40.7	35.94	104810000	94407000	111000000	2695100	3409100	5962200	1694900000	1571300000	1471800000	141720000	228410000	262690000
>sp|P01871|IGHM_HUMAN Ig mu chain C region OS=Homo sapiens GN=IGHM PE=1 SV=3;>sp|P04220|MUCB_HUMAN Ig mu heavy chain disease protein OS=Homo sapiens PE=1 SV=1	>sp|P01871|IGHM_HUMAN Ig mu chain C region OS=Homo sapiens GN=IGHM PE=1 SV=3;>sp|P04220|MUCB_HUMAN Ig mu heavy chain disease protein OS=Homo sapiens PE=1 SV=1	>sp|P01871|IGHM_HUMAN Ig mu chain C region OS=Homo sapiens GN=IGHM PE=1 SV=3;>sp|P04220|MUCB_HUMAN Ig mu heavy chain disease protein OS=Homo sapiens PE=1 SV=1	2	15	3	39.6	49.306	118830000	107640000	134990000	50382000	48134000	49555000	2981300000	2758400000	3008600000	2567100000	2520100000	2505600000
>sp|P02511|CRYAB_HUMAN Alpha-crystallin B chain OS=Homo sapiens GN=CRYAB PE=1 SV=2;>tr|C3VMY8|C3VMY8_HUMAN Alpha B crystallin OS=Homo sapiens GN=CRYAB PE=2 SV=1;>tr|E9PR44|E9PR44_HUMAN Alpha-crystallin B chain (Fragment) OS=Homo sapiens GN=CRYAB PE=3 SV=1;>tr|H0YCW8|H0YCW8_HUMAN Alpha-crystallin B chain (Fragment) OS=Homo sapiens GN=CRYAB PE=3 SV=1	>sp|P02511|CRYAB_HUMAN Alpha-crystallin B chain OS=Homo sapiens GN=CRYAB PE=1 SV=2;>tr|C3VMY8|C3VMY8_HUMAN Alpha B crystallin OS=Homo sapiens GN=CRYAB PE=2 SV=1;>tr|E9PR44|E9PR44_HUMAN Alpha-crystallin B chain (Fragment) OS=Homo sapiens GN=CRYAB PE=3 SV=1;>tr|H0YCW8|H0YCW8_HUMAN Alpha-crystallin B chain (Fragment) OS=Homo sapiens GN=CRYAB PE=3 SV=1	>sp|P02511|CRYAB_HUMAN Alpha-crystallin B chain OS=Homo sapiens GN=CRYAB PE=1 SV=2;>tr|C3VMY8|C3VMY8_HUMAN Alpha B crystallin OS=Homo sapiens GN=CRYAB PE=2 SV=1;>tr|E9PR44|E9PR44_HUMAN Alpha-crystallin B chain (Fragment) OS=Homo sapiens GN=CRYAB PE=3 SV=1;	4	1	1	6.3	20.159	0	1882700	3490800	0	0	0	0	21884000	35997000	0	0	0
>sp|P02549|SPTA1_HUMAN Spectrin alpha chain, erythrocytic 1 OS=Homo sapiens GN=SPTA1 PE=1 SV=5;>tr|D3DVD8|D3DVD8_HUMAN Spectrin, alpha, erythrocytic 1 (Elliptocytosis 2), isoform CRA_c OS=Homo sapiens GN=SPTA1 PE=4 SV=1	>sp|P02549|SPTA1_HUMAN Spectrin alpha chain, erythrocytic 1 OS=Homo sapiens GN=SPTA1 PE=1 SV=5;>tr|D3DVD8|D3DVD8_HUMAN Spectrin, alpha, erythrocytic 1 (Elliptocytosis 2), isoform CRA_c OS=Homo sapiens GN=SPTA1 PE=4 SV=1	>sp|P02549|SPTA1_HUMAN Spectrin alpha chain, erythrocytic 1 OS=Homo sapiens GN=SPTA1 PE=1 SV=5;>tr|D3DVD8|D3DVD8_HUMAN Spectrin, alpha, erythrocytic 1 (Elliptocytosis 2), isoform CRA_c OS=Homo sapiens GN=SPTA1 PE=4 SV=1	2	1	1	0.5	280.01	38797000	35080000	38483000	3838800	3710600	3615200	5132900000	4904300000	4772900000	1035200000	1213200000	987630000
>sp|P02647|APOA1_HUMAN Apolipoprotein A-I OS=Homo sapiens GN=APOA1 PE=1 SV=1;>tr|F8W696|F8W696_HUMAN Truncated apolipoprotein A-I OS=Homo sapiens GN=APOA1 PE=4 SV=1;>tr|Q9Y355|Q9Y355_HUMAN Apolipoprotein A1 (Fragment) OS=Homo sapiens PE=2 SV=1;>tr|Q8TDB0|Q8TDB0_HUMAN Apolipoprotein A-1 A175P variant (Fragment) OS=Homo sapiens PE=2 SV=1;CON__P15497	>sp|P02647|APOA1_HUMAN Apolipoprotein A-I OS=Homo sapiens GN=APOA1 PE=1 SV=1;>tr|F8W696|F8W696_HUMAN Truncated apolipoprotein A-I OS=Homo sapiens GN=APOA1 PE=4 SV=1	>sp|P02647|APOA1_HUMAN Apolipoprotein A-I OS=Homo sapiens GN=APOA1 PE=1 SV=1;>tr|F8W696|F8W696_HUMAN Truncated apolipoprotein A-I OS=Homo sapiens GN=APOA1 PE=4 SV=1	5	20	20	67	30.777	872990000	865620000	920870000	84999000	87438000	87310000	15873000000	16427000000	15736000000	3505700000	3735900000	3720600000
>sp|P02649|APOE_HUMAN Apolipoprotein E OS=Homo sapiens GN=APOE PE=1 SV=1;>tr|H0Y7L5|H0Y7L5_HUMAN Apolipoprotein E (Fragment) OS=Homo sapiens GN=APOE PE=4 SV=2;>tr|J9ZVQ3|J9ZVQ3_HUMAN Apolipoprotein E (Fragment) OS=Homo sapiens GN=APOE PE=4 SV=1;>tr|E7ERP7|E7ERP7_HUMAN Apolipoprotein E (Fragment) OS=Homo sapiens GN=APOE PE=4 SV=1;>tr|E9PEV4|E9PEV4_HUMAN Apolipoprotein E (Fragment) OS=Homo sapiens …	>sp|P02649|APOE_HUMAN Apolipoprotein E OS=Homo sapiens GN=APOE PE=1 SV=1;>tr|H0Y7L5|H0Y7L5_HUMAN Apolipoprotein E (Fragment) OS=Homo sapiens GN=APOE PE=4 SV=2;>tr|J9ZVQ3|J9ZVQ3_HUMAN Apolipoprotein E (Fragment) OS=Homo sapiens GN=APOE PE=4 SV=1;>tr|E7ERP7|E7ERP7_HUMAN Apolipoprotein E (Fragment) OS=Homo sapiens GN=APOE PE=4 SV=1;>tr|E9PEV4|E9PEV4_HUMAN Apolipoprotein E (Fragment) OS=Homo sapiens …	>sp|P02649|APOE_HUMAN Apolipoprotein E OS=Homo sapiens GN=APOE PE=1 SV=1;>tr|H0Y7L5|H0Y7L5_HUMAN Apolipoprotein E (Fragment) OS=Homo sapiens GN=APOE PE=4 SV=2;>tr|J9ZVQ3|J9ZVQ3_HUMAN Apolipoprotein E (Fragment) OS=Homo sapiens GN=APOE PE=4 SV=1;>tr|E7ERP7|	10	3	3	16.7	36.154	0	837540	1656400	0	0	0	0	42993000	36362000	0	0	0
>sp|P02652|APOA2_HUMAN Apolipoprotein A-II OS=Homo sapiens GN=APOA2 PE=1 SV=1	>sp|P02652|APOA2_HUMAN Apolipoprotein A-II OS=Homo sapiens GN=APOA2 PE=1 SV=1	>sp|P02652|APOA2_HUMAN Apolipoprotein A-II OS=Homo sapiens GN=APOA2 PE=1 SV=1	1	6	6	63	11.175	1089200000	796040000	974550000	69998000	61577000	72001000	5245300000	4250500000	4671000000	563890000	716640000	797480000
>sp|P02671|FIBA_HUMAN Fibrinogen alpha chain OS=Homo sapiens GN=FGA PE=1 SV=2;>tr|A8K3E4|A8K3E4_HUMAN cDNA FLJ78367, highly similar to Homo sapiens fibrinogen, A alpha polypeptide (FGA), transcriptvariant alpha, mRNA OS=Homo sapiens PE=2 SV=1	>sp|P02671|FIBA_HUMAN Fibrinogen alpha chain OS=Homo sapiens GN=FGA PE=1 SV=2;>tr|A8K3E4|A8K3E4_HUMAN cDNA FLJ78367, highly similar to Homo sapiens fibrinogen, A alpha polypeptide (FGA), transcriptvariant alpha, mRNA OS=Homo sapiens PE=2 SV=1	>sp|P02671|FIBA_HUMAN Fibrinogen alpha chain OS=Homo sapiens GN=FGA PE=1 SV=2;>tr|A8K3E4|A8K3E4_HUMAN cDNA FLJ78367, highly similar to Homo sapiens fibrinogen, A alpha polypeptide (FGA), transcriptvariant alpha, mRNA OS=Homo sapiens PE=2 SV=1	2	4	4	6.7	94.972	195780	13485	12002	367290	502630	349810	0	6042400	5161700	0	0	0
>sp|P02749|APOH_HUMAN Beta-2-glycoprotein 1 OS=Homo sapiens GN=APOH PE=1 SV=3;>tr|D9IWP9|D9IWP9_HUMAN Beta-2-glycoprotein I (Fragment) OS=Homo sapiens PE=2 SV=1;>tr|B4DPN0|B4DPN0_HUMAN cDNA FLJ51265, moderately similar to Beta-2-glycoprotein 1 (Beta-2-glycoprotein I) OS=Homo sapiens PE=2 SV=1;>tr|J3QRN2|J3QRN2_HUMAN Beta-2-glycoprotein 1 (Fragment) OS=Homo sapiens GN=APOH PE=4 SV=1;>tr|J3QLI0|J3Q…	>sp|P02749|APOH_HUMAN Beta-2-glycoprotein 1 OS=Homo sapiens GN=APOH PE=1 SV=3;>tr|D9IWP9|D9IWP9_HUMAN Beta-2-glycoprotein I (Fragment) OS=Homo sapiens PE=2 SV=1;>tr|B4DPN0|B4DPN0_HUMAN cDNA FLJ51265, moderately similar to Beta-2-glycoprotein 1 (Beta-2-glycoprotein I) OS=Homo sapiens PE=2 SV=1;>tr|J3QRN2|J3QRN2_HUMAN Beta-2-glycoprotein 1 (Fragment) OS=Homo sapiens GN=APOH PE=4 SV=1	>sp|P02749|APOH_HUMAN Beta-2-glycoprotein 1 OS=Homo sapiens GN=APOH PE=1 SV=3;>tr|D9IWP9|D9IWP9_HUMAN Beta-2-glycoprotein I (Fragment) OS=Homo sapiens PE=2 SV=1;>tr|B4DPN0|B4DPN0_HUMAN cDNA FLJ51265, moderately similar to Beta-2-glycoprotein 1 (Beta-2-glyc	7	8	8	38.8	38.298	34807000	52942000	53478000	1665400	894070	2186900	652620000	854800000	844650000	91619000	52062000	107310000
>sp|P02751|FINC_HUMAN Fibronectin OS=Homo sapiens GN=FN1 PE=1 SV=4;>tr|E9PE77|E9PE77_HUMAN Ugl-Y3 OS=Homo sapiens GN=FN1 PE=4 SV=1;>tr|B7ZLE5|B7ZLE5_HUMAN FN1 protein OS=Homo sapiens GN=FN1 PE=2 SV=1;>tr|F8W7G7|F8W7G7_HUMAN Ugl-Y3 OS=Homo sapiens GN=FN1 PE=4 SV=1;>tr|B7ZLF0|B7ZLF0_HUMAN Fibronectin 1 OS=Homo sapiens GN=FN1 PE=2 SV=1;>tr|Q6MZM7|Q6MZM7_HUMAN Putative uncharacterized protein DKFZp68…	>sp|P02751|FINC_HUMAN Fibronectin OS=Homo sapiens GN=FN1 PE=1 SV=4;>tr|E9PE77|E9PE77_HUMAN Ugl-Y3 OS=Homo sapiens GN=FN1 PE=4 SV=1;>tr|B7ZLE5|B7ZLE5_HUMAN FN1 protein OS=Homo sapiens GN=FN1 PE=2 SV=1;>tr|F8W7G7|F8W7G7_HUMAN Ugl-Y3 OS=Homo sapiens GN=FN1 PE=4 SV=1;>tr|B7ZLF0|B7ZLF0_HUMAN Fibronectin 1 OS=Homo sapiens GN=FN1 PE=2 SV=1;>tr|Q6MZM7|Q6MZM7_HUMAN Putative uncharacterized protein DKFZp68…	>sp|P02751|FINC_HUMAN Fibronectin OS=Homo sapiens GN=FN1 PE=1 SV=4;>tr|E9PE77|E9PE77_HUMAN Ugl-Y3 OS=Homo sapiens GN=FN1 PE=4 SV=1;>tr|B7ZLE5|B7ZLE5_HUMAN FN1 protein OS=Homo sapiens GN=FN1 PE=2 SV=1;>tr|F8W7G7|F8W7G7_HUMAN Ugl-Y3 OS=Homo sapiens GN=FN1 PE	30	4	4	1.9	262.62	760870	1031200	1631600	0	0	0	96437000	114290000	105450000	0	0	0
>sp|P02753|RET4_HUMAN Retinol-binding protein 4 OS=Homo sapiens GN=RBP4 PE=1 SV=3;>tr|Q5VY30|Q5VY30_HUMAN Plasma retinol-binding protein(1-182) OS=Homo sapiens GN=RBP4 PE=2 SV=1	>sp|P02753|RET4_HUMAN Retinol-binding protein 4 OS=Homo sapiens GN=RBP4 PE=1 SV=3;>tr|Q5VY30|Q5VY30_HUMAN Plasma retinol-binding protein(1-182) OS=Homo sapiens GN=RBP4 PE=2 SV=1	>sp|P02753|RET4_HUMAN Retinol-binding protein 4 OS=Homo sapiens GN=RBP4 PE=1 SV=3;>tr|Q5VY30|Q5VY30_HUMAN Plasma retinol-binding protein(1-182) OS=Homo sapiens GN=RBP4 PE=2 SV=1	2	4	4	15.9	23.01	3608900	20066000	32220000	0	0	0	185900000	293440000	291280000	0	0	0
>sp|P02763|A1AG1_HUMAN Alpha-1-acid glycoprotein 1 OS=Homo sapiens GN=ORM1 PE=1 SV=1	>sp|P02763|A1AG1_HUMAN Alpha-1-acid glycoprotein 1 OS=Homo sapiens GN=ORM1 PE=1 SV=1	>sp|P02763|A1AG1_HUMAN Alpha-1-acid glycoprotein 1 OS=Homo sapiens GN=ORM1 PE=1 SV=1	1	6	4	32.8	23.511	124620000	144920000	176560000	12682000	11603000	13423000	1285300000	1526700000	1744700000	406230000	352760000	479130000
>tr|B7Z8Q2|B7Z8Q2_HUMAN cDNA FLJ55606, highly similar to Alpha-2-HS-glycoprotein OS=Homo sapiens PE=2 SV=1;>tr|C9JV77|C9JV77_HUMAN Alpha-2-HS-glycoprotein OS=Homo sapiens GN=AHSG PE=4 SV=1;>sp|P02765|FETUA_HUMAN Alpha-2-HS-glycoprotein OS=Homo sapiens GN=AHSG PE=1 SV=1;>tr|B7Z556|B7Z556_HUMAN cDNA FLJ56822, highly similar to Alpha-2-HS-glycoprotein OS=Homo sapiens PE=2 SV=1;CON__P12763	>tr|B7Z8Q2|B7Z8Q2_HUMAN cDNA FLJ55606, highly similar to Alpha-2-HS-glycoprotein OS=Homo sapiens PE=2 SV=1;>tr|C9JV77|C9JV77_HUMAN Alpha-2-HS-glycoprotein OS=Homo sapiens GN=AHSG PE=4 SV=1;>sp|P02765|FETUA_HUMAN Alpha-2-HS-glycoprotein OS=Homo sapiens GN=AHSG PE=1 SV=1;>tr|B7Z556|B7Z556_HUMAN cDNA FLJ56822, highly similar to Alpha-2-HS-glycoprotein OS=Homo sapiens PE=2 SV=1	>tr|B7Z8Q2|B7Z8Q2_HUMAN cDNA FLJ55606, highly similar to Alpha-2-HS-glycoprotein OS=Homo sapiens PE=2 SV=1;>tr|C9JV77|C9JV77_HUMAN Alpha-2-HS-glycoprotein OS=Homo sapiens GN=AHSG PE=4 SV=1;>sp|P02765|FETUA_HUMAN Alpha-2-HS-glycoprotein OS=Homo sapiens GN=A	5	7	7	28.4	46.626	47335000	43346000	64259000	4673400	4041800	4575000	783010000	760870000	872190000	182760000	170330000	177720000
>tr|A6XGL1|A6XGL1_HUMAN Transthyretin OS=Homo sapiens PE=2 SV=1;>sp|P02766|TTHY_HUMAN Transthyretin OS=Homo sapiens GN=TTR PE=1 SV=1;>tr|E9KL36|E9KL36_HUMAN Epididymis tissue sperm binding protein Li 4a OS=Homo sapiens PE=2 SV=1;>tr|A6XMH1|A6XMH1_HUMAN Transthyretin OS=Homo sapiens PE=2 SV=1;>tr|Q8TDB2|Q8TDB2_HUMAN Transthyretin amyloidosis variant D38V (Fragment) OS=Homo sapiens PE=2 SV=1;>tr|Q5…	>tr|A6XGL1|A6XGL1_HUMAN Transthyretin OS=Homo sapiens PE=2 SV=1;>sp|P02766|TTHY_HUMAN Transthyretin OS=Homo sapiens GN=TTR PE=1 SV=1;>tr|E9KL36|E9KL36_HUMAN Epididymis tissue sperm binding protein Li 4a OS=Homo sapiens PE=2 SV=1;>tr|A6XMH1|A6XMH1_HUMAN Transthyretin OS=Homo sapiens PE=2 SV=1	>tr|A6XGL1|A6XGL1_HUMAN Transthyretin OS=Homo sapiens PE=2 SV=1;>sp|P02766|TTHY_HUMAN Transthyretin OS=Homo sapiens GN=TTR PE=1 SV=1;>tr|E9KL36|E9KL36_HUMAN Epididymis tissue sperm binding protein Li 4a OS=Homo sapiens PE=2 SV=1;>tr|A6XMH1|A6XMH1_HUMAN Tra	6	5	5	50.5	20.199	92666000	108980000	107920000	8283000	9707000	11034000	845120000	739520000	675860000	150620000	128430000	211360000
>sp|P02787|TRFE_HUMAN Serotransferrin OS=Homo sapiens GN=TF PE=1 SV=3;>tr|Q06AH7|Q06AH7_HUMAN Transferrin OS=Homo sapiens GN=TF PE=2 SV=1;>tr|J3KN47|J3KN47_HUMAN Serotransferrin OS=Homo sapiens GN=TF PE=4 SV=1;>tr|B4DEX9|B4DEX9_HUMAN cDNA FLJ56687, highly similar to Serotransferrin OS=Homo sapiens PE=2 SV=1;>tr|A0PJA6|A0PJA6_HUMAN TF protein (Fragment) OS=Homo sapiens GN=TF PE=2 SV=1;>tr|H7C5E8|H…	>sp|P02787|TRFE_HUMAN Serotransferrin OS=Homo sapiens GN=TF PE=1 SV=3;>tr|Q06AH7|Q06AH7_HUMAN Transferrin OS=Homo sapiens GN=TF PE=2 SV=1;>tr|J3KN47|J3KN47_HUMAN Serotransferrin OS=Homo sapiens GN=TF PE=4 SV=1	>sp|P02787|TRFE_HUMAN Serotransferrin OS=Homo sapiens GN=TF PE=1 SV=3;>tr|Q06AH7|Q06AH7_HUMAN Transferrin OS=Homo sapiens GN=TF PE=2 SV=1;>tr|J3KN47|J3KN47_HUMAN Serotransferrin OS=Homo sapiens GN=TF PE=4 SV=1	10	45	0	66.9	77.063	539590000	549430000	703000000	65341000	59849000	64847000	26253000000	26268000000	26204000000	5826500000	5684600000	5445300000
>tr|A8K9U8|A8K9U8_HUMAN cDNA FLJ75480, highly similar to Human lactoferrin OS=Homo sapiens PE=2 SV=1;>sp|P02788|TRFL_HUMAN Lactotransferrin OS=Homo sapiens GN=LTF PE=1 SV=6;>tr|E7EQB2|E7EQB2_HUMAN Kaliocin-1 (Fragment) OS=Homo sapiens GN=LTF PE=4 SV=1;>tr|B3VMW0|B3VMW0_HUMAN Lactoferrin OS=Homo sapiens PE=2 SV=1;>tr|Q5DSM0|Q5DSM0_HUMAN Growth-inhibiting protein 12 OS=Homo sapiens GN=GIG12 PE=2 SV…	>tr|A8K9U8|A8K9U8_HUMAN cDNA FLJ75480, highly similar to Human lactoferrin OS=Homo sapiens PE=2 SV=1;>sp|P02788|TRFL_HUMAN Lactotransferrin OS=Homo sapiens GN=LTF PE=1 SV=6;>tr|E7EQB2|E7EQB2_HUMAN Kaliocin-1 (Fragment) OS=Homo sapiens GN=LTF PE=4 SV=1;>tr|B3VMW0|B3VMW0_HUMAN Lactoferrin OS=Homo sapiens PE=2 SV=1;>tr|Q5DSM0|Q5DSM0_HUMAN Growth-inhibiting protein 12 OS=Homo sapiens GN=GIG12 PE=2 SV…	>tr|A8K9U8|A8K9U8_HUMAN cDNA FLJ75480, highly similar to Human lactoferrin OS=Homo sapiens PE=2 SV=1;>sp|P02788|TRFL_HUMAN Lactotransferrin OS=Homo sapiens GN=LTF PE=1 SV=6;>tr|E7EQB2|E7EQB2_HUMAN Kaliocin-1 (Fragment) OS=Homo sapiens GN=LTF PE=4 SV=1;>tr|	8	63	0	81.7	78.337	6363200000	6246300000	7239800000	8858300000	8508600000	8375100000	259090000000	276400000000	263420000000	1040000000000	1045500000000	1014700000000
>sp|P02790|HEMO_HUMAN Hemopexin OS=Homo sapiens GN=HPX PE=1 SV=2;>tr|Q9BS19|Q9BS19_HUMAN HPX protein OS=Homo sapiens PE=2 SV=1;>tr|B7Z8Q4|B7Z8Q4_HUMAN cDNA FLJ56652, highly similar to Hemopexin OS=Homo sapiens PE=2 SV=1	>sp|P02790|HEMO_HUMAN Hemopexin OS=Homo sapiens GN=HPX PE=1 SV=2;>tr|Q9BS19|Q9BS19_HUMAN HPX protein OS=Homo sapiens PE=2 SV=1	>sp|P02790|HEMO_HUMAN Hemopexin OS=Homo sapiens GN=HPX PE=1 SV=2;>tr|Q9BS19|Q9BS19_HUMAN HPX protein OS=Homo sapiens PE=2 SV=1	3	15	15	45.5	51.676	133590000	144040000	157920000	11848000	10646000	13302000	2994100000	3318200000	2937800000	669050000	688280000	655510000
>sp|P02814|SMR3B_HUMAN Submaxillary gland androgen-regulated protein 3B OS=Homo sapiens GN=SMR3B PE=1 SV=2;>tr|Q504X8|Q504X8_HUMAN SMR3B protein OS=Homo sapiens GN=SMR3B PE=2 SV=1	>sp|P02814|SMR3B_HUMAN Submaxillary gland androgen-regulated protein 3B OS=Homo sapiens GN=SMR3B PE=1 SV=2;>tr|Q504X8|Q504X8_HUMAN SMR3B protein OS=Homo sapiens GN=SMR3B PE=2 SV=1	>sp|P02814|SMR3B_HUMAN Submaxillary gland androgen-regulated protein 3B OS=Homo sapiens GN=SMR3B PE=1 SV=2;>tr|Q504X8|Q504X8_HUMAN SMR3B protein OS=Homo sapiens GN=SMR3B PE=2 SV=1	2	2	2	65.8	8.1875	0	89816000	79305000	278050000	277440000	258450000	0	69808000	56807000	1437600000	1495600000	1353600000
>sp|P03973|SLPI_HUMAN Antileukoproteinase OS=Homo sapiens GN=SLPI PE=1 SV=2	>sp|P03973|SLPI_HUMAN Antileukoproteinase OS=Homo sapiens GN=SLPI PE=1 SV=2	>sp|P03973|SLPI_HUMAN Antileukoproteinase OS=Homo sapiens GN=SLPI PE=1 SV=2	1	10	10	65.2	14.326	344190000	214190000	244190000	497420000	425260000	504280000	2354100000	2298200000	2242800000	9238300000	7407200000	9181200000
>sp|P04003|C4BPA_HUMAN C4b-binding protein alpha chain OS=Homo sapiens GN=C4BPA PE=1 SV=2;>tr|Q5VVQ8|Q5VVQ8_HUMAN Complement component 4 binding protein, alpha OS=Homo sapiens GN=C4BPA PE=2 SV=1;>tr|B4E1E1|B4E1E1_HUMAN cDNA FLJ51598, highly similar to C4b-binding protein alpha chain OS=Homo sapiens PE=2 SV=1;>tr|B4E1D8|B4E1D8_HUMAN cDNA FLJ51597, highly similar to C4b-binding protein alpha chain …	>sp|P04003|C4BPA_HUMAN C4b-binding protein alpha chain OS=Homo sapiens GN=C4BPA PE=1 SV=2;>tr|Q5VVQ8|Q5VVQ8_HUMAN Complement component 4 binding protein, alpha OS=Homo sapiens GN=C4BPA PE=2 SV=1;>tr|B4E1E1|B4E1E1_HUMAN cDNA FLJ51598, highly similar to C4b-binding protein alpha chain OS=Homo sapiens PE=2 SV=1;>tr|B4E1D8|B4E1D8_HUMAN cDNA FLJ51597, highly similar to C4b-binding protein alpha chain …	>sp|P04003|C4BPA_HUMAN C4b-binding protein alpha chain OS=Homo sapiens GN=C4BPA PE=1 SV=2;>tr|Q5VVQ8|Q5VVQ8_HUMAN Complement component 4 binding protein, alpha OS=Homo sapiens GN=C4BPA PE=2 SV=1;>tr|B4E1E1|B4E1E1_HUMAN cDNA FLJ51598, highly similar to C4b-	6	5	5	8.9	67.033	2648300	1929500	3837300	0	0	0	89663000	60817000	106340000	0	0	0
>sp|P04004|VTNC_HUMAN Vitronectin OS=Homo sapiens GN=VTN PE=1 SV=1;>tr|D9ZGG2|D9ZGG2_HUMAN Vitronectin OS=Homo sapiens GN=VTN PE=4 SV=1;>tr|B7Z553|B7Z553_HUMAN cDNA FLJ51266, highly similar to Vitronectin OS=Homo sapiens PE=2 SV=1;>tr|J7HH10|J7HH10_HUMAN Vitronectin (Fragment) OS=Homo sapiens PE=4 SV=1;CON__Q3ZBS7;>tr|H0YJW9|H0YJW9_HUMAN Uncharacterized protein (Fragment) OS=Homo sapiens PE=4 SV=3	>sp|P04004|VTNC_HUMAN Vitronectin OS=Homo sapiens GN=VTN PE=1 SV=1;>tr|D9ZGG2|D9ZGG2_HUMAN Vitronectin OS=Homo sapiens GN=VTN PE=4 SV=1;>tr|B7Z553|B7Z553_HUMAN cDNA FLJ51266, highly similar to Vitronectin OS=Homo sapiens PE=2 SV=1	>sp|P04004|VTNC_HUMAN Vitronectin OS=Homo sapiens GN=VTN PE=1 SV=1;>tr|D9ZGG2|D9ZGG2_HUMAN Vitronectin OS=Homo sapiens GN=VTN PE=4 SV=1;>tr|B7Z553|B7Z553_HUMAN cDNA FLJ51266, highly similar to Vitronectin OS=Homo sapiens PE=2 SV=1	6	8	8	20.1	54.305	10829000	21077000	23206000	1049600	985930	1177600	376030000	410480000	394260000	64854000	64902000	75705000
>tr|J3KPS3|J3KPS3_HUMAN Fructose-bisphosphate aldolase OS=Homo sapiens GN=ALDOA PE=3 SV=1;>sp|P04075|ALDOA_HUMAN Fructose-bisphosphate aldolase A OS=Homo sapiens GN=ALDOA PE=1 SV=2;>tr|H3BQN4|H3BQN4_HUMAN Fructose-bisphosphate aldolase OS=Homo sapiens GN=ALDOA PE=3 SV=1;>tr|H3BPS8|H3BPS8_HUMAN Fructose-bisphosphate aldolase A (Fragment) OS=Homo sapiens GN=ALDOA PE=4 SV=1;>tr|H3BR68|H3BR68_HUMAN F…	>tr|J3KPS3|J3KPS3_HUMAN Fructose-bisphosphate aldolase OS=Homo sapiens GN=ALDOA PE=3 SV=1;>sp|P04075|ALDOA_HUMAN Fructose-bisphosphate aldolase A OS=Homo sapiens GN=ALDOA PE=1 SV=2;>tr|H3BQN4|H3BQN4_HUMAN Fructose-bisphosphate aldolase OS=Homo sapiens GN=ALDOA PE=3 SV=1;>tr|H3BPS8|H3BPS8_HUMAN Fructose-bisphosphate aldolase A (Fragment) OS=Homo sapiens GN=ALDOA PE=4 SV=1;>tr|H3BR68|H3BR68_HUMAN F…	>tr|J3KPS3|J3KPS3_HUMAN Fructose-bisphosphate aldolase OS=Homo sapiens GN=ALDOA PE=3 SV=1;>sp|P04075|ALDOA_HUMAN Fructose-bisphosphate aldolase A OS=Homo sapiens GN=ALDOA PE=1 SV=2;>tr|H3BQN4|H3BQN4_HUMAN Fructose-bisphosphate aldolase OS=Homo sapiens GN=A	18	8	8	20.1	39.817	6038900	12888000	15532000	1488900	835510	620200	197620000	210520000	255910000	75368000	93432000	69497000
>sp|P04080|CYTB_HUMAN Cystatin-B OS=Homo sapiens GN=CSTB PE=1 SV=2;>tr|Q76LA1|Q76LA1_HUMAN CSTB protein OS=Homo sapiens GN=CSTB PE=2 SV=1	>sp|P04080|CYTB_HUMAN Cystatin-B OS=Homo sapiens GN=CSTB PE=1 SV=2;>tr|Q76LA1|Q76LA1_HUMAN CSTB protein OS=Homo sapiens GN=CSTB PE=2 SV=1	>sp|P04080|CYTB_HUMAN Cystatin-B OS=Homo sapiens GN=CSTB PE=1 SV=2;>tr|Q76LA1|Q76LA1_HUMAN CSTB protein OS=Homo sapiens GN=CSTB PE=2 SV=1	2	2	2	24.5	11.139	18716000	20460000	19465000	0	0	1478900	121410000	108160000	95313000	0	0	40254000
>sp|P04083|ANXA1_HUMAN Annexin A1 OS=Homo sapiens GN=ANXA1 PE=1 SV=2;>tr|Q5TZZ9|Q5TZZ9_HUMAN Annexin OS=Homo sapiens GN=ANXA1 PE=2 SV=1;>tr|B5BU38|B5BU38_HUMAN Annexin OS=Homo sapiens GN=ANXA1 PE=2 SV=1;>tr|Q5T3N1|Q5T3N1_HUMAN Annexin (Fragment) OS=Homo sapiens GN=ANXA1 PE=2 SV=1;>tr|B4DL19|B4DL19_HUMAN Annexin OS=Homo sapiens PE=2 SV=1;>tr|Q5T3N0|Q5T3N0_HUMAN Annexin (Fragment) OS=Homo sapiens G…	>sp|P04083|ANXA1_HUMAN Annexin A1 OS=Homo sapiens GN=ANXA1 PE=1 SV=2;>tr|Q5TZZ9|Q5TZZ9_HUMAN Annexin OS=Homo sapiens GN=ANXA1 PE=2 SV=1;>tr|B5BU38|B5BU38_HUMAN Annexin OS=Homo sapiens GN=ANXA1 PE=2 SV=1;>tr|Q5T3N1|Q5T3N1_HUMAN Annexin (Fragment) OS=Homo sapiens GN=ANXA1 PE=2 SV=1;>tr|B4DL19|B4DL19_HUMAN Annexin OS=Homo sapiens PE=2 SV=1	>sp|P04083|ANXA1_HUMAN Annexin A1 OS=Homo sapiens GN=ANXA1 PE=1 SV=2;>tr|Q5TZZ9|Q5TZZ9_HUMAN Annexin OS=Homo sapiens GN=ANXA1 PE=2 SV=1;>tr|B5BU38|B5BU38_HUMAN Annexin OS=Homo sapiens GN=ANXA1 PE=2 SV=1;>tr|Q5T3N1|Q5T3N1_HUMAN Annexin (Fragment) OS=Homo sa	7	7	7	26.3	38.714	2867900	8974000	9848100	1166700	1035100	1164100	128620000	129530000	127550000	105790000	93855000	83325000
>sp|P04114|APOB_HUMAN Apolipoprotein B-100 OS=Homo sapiens GN=APOB PE=1 SV=2;>tr|C0JYY2|C0JYY2_HUMAN Apolipoprotein B (Including Ag(X) antigen) OS=Homo sapiens GN=APOB PE=4 SV=1;>tr|E1A689|E1A689_HUMAN Mutant Apo B 100 OS=Homo sapiens PE=2 SV=1;>tr|Q59HB3|Q59HB3_HUMAN Apolipoprotein B variant (Fragment) OS=Homo sapiens PE=2 SV=1;>tr|A8K479|A8K479_HUMAN cDNA FLJ77094, highly similar to Homo sapien…	>sp|P04114|APOB_HUMAN Apolipoprotein B-100 OS=Homo sapiens GN=APOB PE=1 SV=2;>tr|C0JYY2|C0JYY2_HUMAN Apolipoprotein B (Including Ag(X) antigen) OS=Homo sapiens GN=APOB PE=4 SV=1;>tr|E1A689|E1A689_HUMAN Mutant Apo B 100 OS=Homo sapiens PE=2 SV=1	>sp|P04114|APOB_HUMAN Apolipoprotein B-100 OS=Homo sapiens GN=APOB PE=1 SV=2;>tr|C0JYY2|C0JYY2_HUMAN Apolipoprotein B (Including Ag(X) antigen) OS=Homo sapiens GN=APOB PE=4 SV=1;>tr|E1A689|E1A689_HUMAN Mutant Apo B 100 OS=Homo sapiens PE=2 SV=1	8	18	18	5.3	515.6	730730	1296000	1613700	0	0	0	225410000	267510000	267330000	0	0	0
>sp|P04196|HRG_HUMAN Histidine-rich glycoprotein OS=Homo sapiens GN=HRG PE=1 SV=1;>tr|B2R8I2|B2R8I2_HUMAN cDNA, FLJ93914, highly similar to Homo sapiens histidine-rich glycoprotein (HRG), mRNA OS=Homo sapiens PE=2 SV=1;>tr|Q68DR3|Q68DR3_HUMAN Putative uncharacterized protein DKFZp779H1622 (Fragment) OS=Homo sapiens GN=DKFZp779H1622 PE=2 SV=1	>sp|P04196|HRG_HUMAN Histidine-rich glycoprotein OS=Homo sapiens GN=HRG PE=1 SV=1;>tr|B2R8I2|B2R8I2_HUMAN cDNA, FLJ93914, highly similar to Homo sapiens histidine-rich glycoprotein (HRG), mRNA OS=Homo sapiens PE=2 SV=1	>sp|P04196|HRG_HUMAN Histidine-rich glycoprotein OS=Homo sapiens GN=HRG PE=1 SV=1;>tr|B2R8I2|B2R8I2_HUMAN cDNA, FLJ93914, highly similar to Homo sapiens histidine-rich glycoprotein (HRG), mRNA OS=Homo sapiens PE=2 SV=1	3	5	5	10.7	59.578	3754000	9241200	10215000	0	118420	0	161050000	189240000	172220000	0	22374000	0
>sp|P04208|LV106_HUMAN Ig lambda chain V-I region WAH OS=Homo sapiens PE=1 SV=1	>sp|P04208|LV106_HUMAN Ig lambda chain V-I region WAH OS=Homo sapiens PE=1 SV=1	>sp|P04208|LV106_HUMAN Ig lambda chain V-I region WAH OS=Homo sapiens PE=1 SV=1	1	3	1	22	11.725	0	12233000	15576000	5072300	0	0	0	70486000	76452000	66686000	0	0
>sp|P04217|A1BG_HUMAN Alpha-1B-glycoprotein OS=Homo sapiens GN=A1BG PE=1 SV=4;>tr|B3KP79|B3KP79_HUMAN cDNA FLJ31323 fis, clone LIVER2000037, highly similar to Alpha-1B-glycoprotein OS=Homo sapiens PE=2 SV=1;>tr|B3KWB5|B3KWB5_HUMAN cDNA FLJ42722 fis, clone BRAMY4000277, highly similar to Alpha-1B-glycoprotein OS=Homo sapiens PE=2 SV=1;>tr|Q7Z3U3|Q7Z3U3_HUMAN Putative uncharacterized protein DKFZp6…	>sp|P04217|A1BG_HUMAN Alpha-1B-glycoprotein OS=Homo sapiens GN=A1BG PE=1 SV=4;>tr|B3KP79|B3KP79_HUMAN cDNA FLJ31323 fis, clone LIVER2000037, highly similar to Alpha-1B-glycoprotein OS=Homo sapiens PE=2 SV=1	>sp|P04217|A1BG_HUMAN Alpha-1B-glycoprotein OS=Homo sapiens GN=A1BG PE=1 SV=4;>tr|B3KP79|B3KP79_HUMAN cDNA FLJ31323 fis, clone LIVER2000037, highly similar to Alpha-1B-glycoprotein OS=Homo sapiens PE=2 SV=1	4	11	11	32.9	54.253	33156000	36766000	40577000	1341000	1617700	2291800	623990000	610430000	605530000	46890000	100040000	111990000
>sp|P04406|G3P_HUMAN Glyceraldehyde-3-phosphate dehydrogenase OS=Homo sapiens GN=GAPDH PE=1 SV=3;>tr|Q2TSD0|Q2TSD0_HUMAN Glyceraldehyde-3-phosphate dehydrogenase OS=Homo sapiens PE=2 SV=1;>tr|E7EUT4|E7EUT4_HUMAN Glyceraldehyde-3-phosphate dehydrogenase OS=Homo sapiens GN=GAPDH PE=3 SV=1;>tr|E7EUT5|E7EUT5_HUMAN Glyceraldehyde-3-phosphate dehydrogenase OS=Homo sapiens GN=GAPDH PE=3 SV=1;>tr|Q0QET7|…	>sp|P04406|G3P_HUMAN Glyceraldehyde-3-phosphate dehydrogenase OS=Homo sapiens GN=GAPDH PE=1 SV=3;>tr|Q2TSD0|Q2TSD0_HUMAN Glyceraldehyde-3-phosphate dehydrogenase OS=Homo sapiens PE=2 SV=1;>tr|E7EUT4|E7EUT4_HUMAN Glyceraldehyde-3-phosphate dehydrogenase OS=Homo sapiens GN=GAPDH PE=3 SV=1;>tr|E7EUT5|E7EUT5_HUMAN Glyceraldehyde-3-phosphate dehydrogenase OS=Homo sapiens GN=GAPDH PE=3 SV=1;>tr|Q0QET7|…	>sp|P04406|G3P_HUMAN Glyceraldehyde-3-phosphate dehydrogenase OS=Homo sapiens GN=GAPDH PE=1 SV=3;>tr|Q2TSD0|Q2TSD0_HUMAN Glyceraldehyde-3-phosphate dehydrogenase OS=Homo sapiens PE=2 SV=1;>tr|E7EUT4|E7EUT4_HUMAN Glyceraldehyde-3-phosphate dehydrogenase OS=	10	11	11	41.8	36.053	74760000	69874000	82304000	10467000	9983300	8126800	1214000000	1315000000	1174100000	399940000	375140000	423580000
>sp|P04430|KV122_HUMAN Ig kappa chain V-I region BAN OS=Homo sapiens PE=1 SV=1	>sp|P04430|KV122_HUMAN Ig kappa chain V-I region BAN OS=Homo sapiens PE=1 SV=1	>sp|P04430|KV122_HUMAN Ig kappa chain V-I region BAN OS=Homo sapiens PE=1 SV=1	1	1	1	16.7	11.84	26957000	49571000	25087000	10180000	10008000	0	59416000	82825000	44554000	55914000	56913000	0
>sp|P04792|HSPB1_HUMAN Heat shock protein beta-1 OS=Homo sapiens GN=HSPB1 PE=1 SV=2;>tr|B4DL87|B4DL87_HUMAN cDNA FLJ52243, highly similar to Heat-shock protein beta-1 OS=Homo sapiens PE=2 SV=1;>tr|F8WE04|F8WE04_HUMAN Heat shock protein beta-1 OS=Homo sapiens GN=HSPB1 PE=4 SV=1;>tr|C9J3N8|C9J3N8_HUMAN Heat shock protein beta-1 OS=Homo sapiens GN=HSPB1 PE=4 SV=1	>sp|P04792|HSPB1_HUMAN Heat shock protein beta-1 OS=Homo sapiens GN=HSPB1 PE=1 SV=2;>tr|B4DL87|B4DL87_HUMAN cDNA FLJ52243, highly similar to Heat-shock protein beta-1 OS=Homo sapiens PE=2 SV=1;>tr|F8WE04|F8WE04_HUMAN Heat shock protein beta-1 OS=Homo sapiens GN=HSPB1 PE=4 SV=1	>sp|P04792|HSPB1_HUMAN Heat shock protein beta-1 OS=Homo sapiens GN=HSPB1 PE=1 SV=2;>tr|B4DL87|B4DL87_HUMAN cDNA FLJ52243, highly similar to Heat-shock protein beta-1 OS=Homo sapiens PE=2 SV=1;>tr|F8WE04|F8WE04_HUMAN Heat shock protein beta-1 OS=Homo sapie	4	8	8	48.8	22.782	58024000	60786000	100010000	6947700	6151600	6205000	973660000	970900000	1012200000	312470000	254880000	293120000
>sp|P16104|H2AX_HUMAN Histone H2A.x OS=Homo sapiens GN=H2AFX PE=1 SV=2;>sp|Q96QV6|H2A1A_HUMAN Histone H2A type 1-A OS=Homo sapiens GN=HIST1H2AA PE=1 SV=3;>sp|P04908|H2A1B_HUMAN Histone H2A type 1-B/E OS=Homo sapiens GN=HIST1H2AB PE=1 SV=2;>sp|P0C0S8|H2A1_HUMAN Histone H2A type 1 OS=Homo sapiens GN=HIST1H2AG PE=1 SV=2;>sp|P20671|H2A1D_HUMAN Histone H2A type 1-D OS=Homo sapiens GN=HIST1H2AD PE=1 SV…	>sp|P16104|H2AX_HUMAN Histone H2A.x OS=Homo sapiens GN=H2AFX PE=1 SV=2;>sp|Q96QV6|H2A1A_HUMAN Histone H2A type 1-A OS=Homo sapiens GN=HIST1H2AA PE=1 SV=3;>sp|P04908|H2A1B_HUMAN Histone H2A type 1-B/E OS=Homo sapiens GN=HIST1H2AB PE=1 SV=2;>sp|P0C0S8|H2A1_HUMAN Histone H2A type 1 OS=Homo sapiens GN=HIST1H2AG PE=1 SV=2;>sp|P20671|H2A1D_HUMAN Histone H2A type 1-D OS=Homo sapiens GN=HIST1H2AD PE=1 SV…	>sp|P16104|H2AX_HUMAN Histone H2A.x OS=Homo sapiens GN=H2AFX PE=1 SV=2;>sp|Q96QV6|H2A1A_HUMAN Histone H2A type 1-A OS=Homo sapiens GN=HIST1H2AA PE=1 SV=3;>sp|P04908|H2A1B_HUMAN Histone H2A type 1-B/E OS=Homo sapiens GN=HIST1H2AB PE=1 SV=2;>sp|P0C0S8|H2A1_H	23	2	2	18.2	15.144	4871700	13178000	16278000	1718100	3726700	3311900	80570000	83765000	75789000	61862000	52468000	46640000
>tr|C9JF17|C9JF17_HUMAN Apolipoprotein D (Fragment) OS=Homo sapiens GN=APOD PE=4 SV=1;>sp|P05090|APOD_HUMAN Apolipoprotein D OS=Homo sapiens GN=APOD PE=1 SV=1;>tr|C9JX71|C9JX71_HUMAN Apolipoprotein D (Fragment) OS=Homo sapiens GN=APOD PE=4 SV=1;>tr|B4DGC3|B4DGC3_HUMAN cDNA FLJ57921, highly similar to Apolipoprotein D OS=Homo sapiens PE=2 SV=1;>tr|F8WBT9|F8WBT9_HUMAN Apolipoprotein D OS=Homo sapie…	>tr|C9JF17|C9JF17_HUMAN Apolipoprotein D (Fragment) OS=Homo sapiens GN=APOD PE=4 SV=1;>sp|P05090|APOD_HUMAN Apolipoprotein D OS=Homo sapiens GN=APOD PE=1 SV=1	>tr|C9JF17|C9JF17_HUMAN Apolipoprotein D (Fragment) OS=Homo sapiens GN=APOD PE=4 SV=1;>sp|P05090|APOD_HUMAN Apolipoprotein D OS=Homo sapiens GN=APOD PE=1 SV=1	5	5	5	27	24.158	38375000	37838000	45813000	19096000	13860000	18354000	435920000	413990000	452920000	492200000	494720000	463960000
>sp|P05109|S10A8_HUMAN Protein S100-A8 OS=Homo sapiens GN=S100A8 PE=1 SV=1	>sp|P05109|S10A8_HUMAN Protein S100-A8 OS=Homo sapiens GN=S100A8 PE=1 SV=1	>sp|P05109|S10A8_HUMAN Protein S100-A8 OS=Homo sapiens GN=S100A8 PE=1 SV=1	1	7	7	63.4	10.834	511950000	444220000	533300000	100770000	107420000	108950000	4631700000	3647000000	4407200000	1574000000	1673600000	1665300000
>tr|E9PGN7|E9PGN7_HUMAN Plasma protease C1 inhibitor OS=Homo sapiens GN=SERPING1 PE=3 SV=1;>tr|B4E1F0|B4E1F0_HUMAN Plasma protease C1 inhibitor OS=Homo sapiens GN=SERPING1 PE=2 SV=1;>sp|P05155|IC1_HUMAN Plasma protease C1 inhibitor OS=Homo sapiens GN=SERPING1 PE=1 SV=2;>tr|E9KL26|E9KL26_HUMAN Epididymis tissue protein Li 173 OS=Homo sapiens PE=2 SV=1;>tr|B4E1H2|B4E1H2_HUMAN Plasma protease C1 inh…	>tr|E9PGN7|E9PGN7_HUMAN Plasma protease C1 inhibitor OS=Homo sapiens GN=SERPING1 PE=3 SV=1;>tr|B4E1F0|B4E1F0_HUMAN Plasma protease C1 inhibitor OS=Homo sapiens GN=SERPING1 PE=2 SV=1;>sp|P05155|IC1_HUMAN Plasma protease C1 inhibitor OS=Homo sapiens GN=SERPING1 PE=1 SV=2;>tr|E9KL26|E9KL26_HUMAN Epididymis tissue protein Li 173 OS=Homo sapiens PE=2 SV=1;>tr|B4E1H2|B4E1H2_HUMAN Plasma protease C1 inh…	>tr|E9PGN7|E9PGN7_HUMAN Plasma protease C1 inhibitor OS=Homo sapiens GN=SERPING1 PE=3 SV=1;>tr|B4E1F0|B4E1F0_HUMAN Plasma protease C1 inhibitor OS=Homo sapiens GN=SERPING1 PE=2 SV=1;>sp|P05155|IC1_HUMAN Plasma protease C1 inhibitor OS=Homo sapiens GN=SERPI	7	7	7	13.6	59.491	14997000	21433000	19272000	1045700	1441900	321900	409010000	483550000	465000000	105880000	120260000	36067000
>sp|Q15651|HMGN3_HUMAN High mobility group nucleosome-binding domain-containing protein 3 OS=Homo sapiens GN=HMGN3 PE=1 SV=2;>sp|P05204|HMGN2_HUMAN Non-histone chromosomal protein HMG-17 OS=Homo sapiens GN=HMGN2 PE=1 SV=3	>sp|Q15651|HMGN3_HUMAN High mobility group nucleosome-binding domain-containing protein 3 OS=Homo sapiens GN=HMGN3 PE=1 SV=2;>sp|P05204|HMGN2_HUMAN Non-histone chromosomal protein HMG-17 OS=Homo sapiens GN=HMGN2 PE=1 SV=3	>sp|Q15651|HMGN3_HUMAN High mobility group nucleosome-binding domain-containing protein 3 OS=Homo sapiens GN=HMGN3 PE=1 SV=2;>sp|P05204|HMGN2_HUMAN Non-histone chromosomal protein HMG-17 OS=Homo sapiens GN=HMGN2 PE=1 SV=3	2	1	1	9.1	10.666	25841000	21167000	28942000	3035100	2293900	3513600	77522000	67102000	81394000	21353000	17007000	24847000
>tr|H7C2N1|H7C2N1_HUMAN Thymosin alpha-1 (Fragment) OS=Homo sapiens GN=PTMA PE=4 SV=1;>tr|B8ZZW7|B8ZZW7_HUMAN Thymosin alpha-1 OS=Homo sapiens GN=PTMA PE=4 SV=1;>tr|B8ZZA1|B8ZZA1_HUMAN Thymosin alpha-1 OS=Homo sapiens GN=PTMA PE=4 SV=1;>sp|P06454|PTMA_HUMAN Prothymosin alpha OS=Homo sapiens GN=PTMA PE=1 SV=2;>tr|Q15200|Q15200_HUMAN Prothymosin alpha OS=Homo sapiens PE=4 SV=2;>tr|Q15204|Q15204_HUM…	>tr|H7C2N1|H7C2N1_HUMAN Thymosin alpha-1 (Fragment) OS=Homo sapiens GN=PTMA PE=4 SV=1;>tr|B8ZZW7|B8ZZW7_HUMAN Thymosin alpha-1 OS=Homo sapiens GN=PTMA PE=4 SV=1;>tr|B8ZZA1|B8ZZA1_HUMAN Thymosin alpha-1 OS=Homo sapiens GN=PTMA PE=4 SV=1;>sp|P06454|PTMA_HUMAN Prothymosin alpha OS=Homo sapiens GN=PTMA PE=1 SV=2;>tr|Q15200|Q15200_HUMAN Prothymosin alpha OS=Homo sapiens PE=4 SV=2;>tr|Q15204|Q15204_HUM…	>tr|H7C2N1|H7C2N1_HUMAN Thymosin alpha-1 (Fragment) OS=Homo sapiens GN=PTMA PE=4 SV=1;>tr|B8ZZW7|B8ZZW7_HUMAN Thymosin alpha-1 OS=Homo sapiens GN=PTMA PE=4 SV=1;>tr|B8ZZA1|B8ZZA1_HUMAN Thymosin alpha-1 OS=Homo sapiens GN=PTMA PE=4 SV=1;>sp|P06454|PTMA_HUMA	18	3	3	16.2	15.747	45471000	62755000	54123000	1843700	2520100	2871500	192130000	240130000	192990000	23909000	32689000	35107000
>sp|P06702|S10A9_HUMAN Protein S100-A9 OS=Homo sapiens GN=S100A9 PE=1 SV=1;>tr|B2R4M6|B2R4M6_HUMAN cDNA, FLJ92148, highly similar to Homo sapiens S100 calcium binding protein A9 (calgranulin B) (S100A9), mRNA OS=Homo sapiens PE=4 SV=1	>sp|P06702|S10A9_HUMAN Protein S100-A9 OS=Homo sapiens GN=S100A9 PE=1 SV=1;>tr|B2R4M6|B2R4M6_HUMAN cDNA, FLJ92148, highly similar to Homo sapiens S100 calcium binding protein A9 (calgranulin B) (S100A9), mRNA OS=Homo sapiens PE=4 SV=1	>sp|P06702|S10A9_HUMAN Protein S100-A9 OS=Homo sapiens GN=S100A9 PE=1 SV=1;>tr|B2R4M6|B2R4M6_HUMAN cDNA, FLJ92148, highly similar to Homo sapiens S100 calcium binding protein A9 (calgranulin B) (S100A9), mRNA OS=Homo sapiens PE=4 SV=1	2	7	7	70.2	13.242	680180000	741960000	1000500000	148470000	145920000	156320000	5943900000	6446000000	7311800000	2569300000	2670800000	2692300000
>sp|P06703|S10A6_HUMAN Protein S100-A6 OS=Homo sapiens GN=S100A6 PE=1 SV=1;>tr|B2R577|B2R577_HUMAN cDNA, FLJ92369, highly similar to Homo sapiens S100 calcium binding protein A6 (calcyclin) (S100A6),mRNA OS=Homo sapiens PE=4 SV=1	>sp|P06703|S10A6_HUMAN Protein S100-A6 OS=Homo sapiens GN=S100A6 PE=1 SV=1;>tr|B2R577|B2R577_HUMAN cDNA, FLJ92369, highly similar to Homo sapiens S100 calcium binding protein A6 (calcyclin) (S100A6),mRNA OS=Homo sapiens PE=4 SV=1	>sp|P06703|S10A6_HUMAN Protein S100-A6 OS=Homo sapiens GN=S100A6 PE=1 SV=1;>tr|B2R577|B2R577_HUMAN cDNA, FLJ92369, highly similar to Homo sapiens S100 calcium binding protein A6 (calcyclin) (S100A6),mRNA OS=Homo sapiens PE=4 SV=1	2	3	3	24.4	10.18	595160000	510010000	725680000	82448000	79896000	81154000	3194300000	2874500000	3722100000	1041100000	859240000	838840000
>sp|P06727|APOA4_HUMAN Apolipoprotein A-IV OS=Homo sapiens GN=APOA4 PE=1 SV=3;>tr|Q13784|Q13784_HUMAN APOA4 protein (Fragment) OS=Homo sapiens GN=APOA4 PE=2 SV=1	>sp|P06727|APOA4_HUMAN Apolipoprotein A-IV OS=Homo sapiens GN=APOA4 PE=1 SV=3;>tr|Q13784|Q13784_HUMAN APOA4 protein (Fragment) OS=Homo sapiens GN=APOA4 PE=2 SV=1	>sp|P06727|APOA4_HUMAN Apolipoprotein A-IV OS=Homo sapiens GN=APOA4 PE=1 SV=3;>tr|Q13784|Q13784_HUMAN APOA4 protein (Fragment) OS=Homo sapiens GN=APOA4 PE=2 SV=1	2	18	18	48	45.398	26901000	42752000	47569000	2123600	1561600	628310	1138200000	1067700000	984810000	229190000	160090000	61875000
>sp|P06733|ENOA_HUMAN Alpha-enolase OS=Homo sapiens GN=ENO1 PE=1 SV=2;>tr|E2DRY6|E2DRY6_HUMAN Enolase OS=Homo sapiens PE=2 SV=1;>tr|Q9BT62|Q9BT62_HUMAN Enolase (Fragment) OS=Homo sapiens GN=ENO1 PE=2 SV=1;>tr|K7EM90|K7EM90_HUMAN Alpha-enolase (Fragment) OS=Homo sapiens GN=ENO1 PE=4 SV=1;>tr|Q96GV1|Q96GV1_HUMAN Enolase (Fragment) OS=Homo sapiens GN=ENO1 PE=2 SV=2;>tr|A4UCS8|A4UCS8_HUMAN Enolase (F…	>sp|P06733|ENOA_HUMAN Alpha-enolase OS=Homo sapiens GN=ENO1 PE=1 SV=2;>tr|E2DRY6|E2DRY6_HUMAN Enolase OS=Homo sapiens PE=2 SV=1;>tr|Q9BT62|Q9BT62_HUMAN Enolase (Fragment) OS=Homo sapiens GN=ENO1 PE=2 SV=1;>tr|K7EM90|K7EM90_HUMAN Alpha-enolase (Fragment) OS=Homo sapiens GN=ENO1 PE=4 SV=1	>sp|P06733|ENOA_HUMAN Alpha-enolase OS=Homo sapiens GN=ENO1 PE=1 SV=2;>tr|E2DRY6|E2DRY6_HUMAN Enolase OS=Homo sapiens PE=2 SV=1;>tr|Q9BT62|Q9BT62_HUMAN Enolase (Fragment) OS=Homo sapiens GN=ENO1 PE=2 SV=1;>tr|K7EM90|K7EM90_HUMAN Alpha-enolase (Fragment) OS	18	14	12	47.2	47.168	88218000	83073000	95473000	11735000	8749900	10933000	1946700000	1909200000	1864500000	566850000	477800000	484610000
>sp|P06744|G6PI_HUMAN Glucose-6-phosphate isomerase OS=Homo sapiens GN=GPI PE=1 SV=4;>tr|B4DVJ0|B4DVJ0_HUMAN Glucose-6-phosphate isomerase OS=Homo sapiens PE=2 SV=1;>tr|B4DE36|B4DE36_HUMAN Glucose-6-phosphate isomerase OS=Homo sapiens PE=2 SV=1	>sp|P06744|G6PI_HUMAN Glucose-6-phosphate isomerase OS=Homo sapiens GN=GPI PE=1 SV=4;>tr|B4DVJ0|B4DVJ0_HUMAN Glucose-6-phosphate isomerase OS=Homo sapiens PE=2 SV=1;>tr|B4DE36|B4DE36_HUMAN Glucose-6-phosphate isomerase OS=Homo sapiens PE=2 SV=1	>sp|P06744|G6PI_HUMAN Glucose-6-phosphate isomerase OS=Homo sapiens GN=GPI PE=1 SV=4;>tr|B4DVJ0|B4DVJ0_HUMAN Glucose-6-phosphate isomerase OS=Homo sapiens PE=2 SV=1;>tr|B4DE36|B4DE36_HUMAN Glucose-6-phosphate isomerase OS=Homo sapiens PE=2 SV=1	3	1	1	3	63.146	0	934890	708290	0	0	0	0	23852000	18301000	0	0	0
>sp|P06748|NPM_HUMAN Nucleophosmin OS=Homo sapiens GN=NPM1 PE=1 SV=2;>tr|A4ZU86|A4ZU86_HUMAN Truncated nucleolar phosphoprotein B23 OS=Homo sapiens GN=NPM1 PE=2 SV=1;>tr|Q9BTI9|Q9BTI9_HUMAN NPM1 protein (Fragment) OS=Homo sapiens GN=NPM1 PE=2 SV=2;>tr|Q9NX34|Q9NX34_HUMAN cDNA FLJ20465 fis, clone KAT06236 OS=Homo sapiens PE=2 SV=1;>tr|Q504R3|Q504R3_HUMAN Putative uncharacterized protein OS=Homo sa…	>sp|P06748|NPM_HUMAN Nucleophosmin OS=Homo sapiens GN=NPM1 PE=1 SV=2;>tr|A4ZU86|A4ZU86_HUMAN Truncated nucleolar phosphoprotein B23 OS=Homo sapiens GN=NPM1 PE=2 SV=1;>tr|Q9BTI9|Q9BTI9_HUMAN NPM1 protein (Fragment) OS=Homo sapiens GN=NPM1 PE=2 SV=2;>tr|Q9NX34|Q9NX34_HUMAN cDNA FLJ20465 fis, clone KAT06236 OS=Homo sapiens PE=2 SV=1;>tr|Q504R3|Q504R3_HUMAN Putative uncharacterized protein OS=Homo sa…	>sp|P06748|NPM_HUMAN Nucleophosmin OS=Homo sapiens GN=NPM1 PE=1 SV=2;>tr|A4ZU86|A4ZU86_HUMAN Truncated nucleolar phosphoprotein B23 OS=Homo sapiens GN=NPM1 PE=2 SV=1;>tr|Q9BTI9|Q9BTI9_HUMAN NPM1 protein (Fragment) OS=Homo sapiens GN=NPM1 PE=2 SV=2;>tr|Q9NX	5	2	2	5.4	32.575	2905000	0	4678700	0	0	0	47142000	0	40350000	0	0	0
>sp|P07237|PDIA1_HUMAN Protein disulfide-isomerase OS=Homo sapiens GN=P4HB PE=1 SV=3;>tr|B4DNL5|B4DNL5_HUMAN cDNA FLJ59361, highly similar to Protein disulfide-isomerase (EC 5.3.4.1) OS=Homo sapiens PE=2 SV=1;>tr|B4DJS0|B4DJS0_HUMAN cDNA FLJ56766, highly similar to Protein disulfide-isomerase (EC5.3.4.1) OS=Homo sapiens PE=2 SV=1;>tr|I3L312|I3L312_HUMAN Protein disulfide-isomerase (Fragment) OS=H…	>sp|P07237|PDIA1_HUMAN Protein disulfide-isomerase OS=Homo sapiens GN=P4HB PE=1 SV=3;>tr|B4DNL5|B4DNL5_HUMAN cDNA FLJ59361, highly similar to Protein disulfide-isomerase (EC 5.3.4.1) OS=Homo sapiens PE=2 SV=1;>tr|B4DJS0|B4DJS0_HUMAN cDNA FLJ56766, highly similar to Protein disulfide-isomerase (EC5.3.4.1) OS=Homo sapiens PE=2 SV=1;>tr|I3L312|I3L312_HUMAN Protein disulfide-isomerase (Fragment) OS=H…	>sp|P07237|PDIA1_HUMAN Protein disulfide-isomerase OS=Homo sapiens GN=P4HB PE=1 SV=3;>tr|B4DNL5|B4DNL5_HUMAN cDNA FLJ59361, highly similar to Protein disulfide-isomerase (EC 5.3.4.1) OS=Homo sapiens PE=2 SV=1;>tr|B4DJS0|B4DJS0_HUMAN cDNA FLJ56766, highly s	5	1	1	5.9	57.116	288090	368150	277670	112920	126200	136840	10209000	13786000	9224700	9132700	10508000	10816000
>sp|P07339|CATD_HUMAN Cathepsin D OS=Homo sapiens GN=CTSD PE=1 SV=1;>tr|H7C469|H7C469_HUMAN Uncharacterized protein (Fragment) OS=Homo sapiens PE=3 SV=1;>tr|C9JH19|C9JH19_HUMAN Cathepsin D light chain (Fragment) OS=Homo sapiens GN=CTSD PE=3 SV=1;>tr|F8WD96|F8WD96_HUMAN Cathepsin D light chain OS=Homo sapiens GN=CTSD PE=3 SV=1;>tr|F8W787|F8W787_HUMAN Cathepsin D light chain (Fragment) OS=Homo sapi…	>sp|P07339|CATD_HUMAN Cathepsin D OS=Homo sapiens GN=CTSD PE=1 SV=1;>tr|H7C469|H7C469_HUMAN Uncharacterized protein (Fragment) OS=Homo sapiens PE=3 SV=1;>tr|C9JH19|C9JH19_HUMAN Cathepsin D light chain (Fragment) OS=Homo sapiens GN=CTSD PE=3 SV=1;>tr|F8WD96|F8WD96_HUMAN Cathepsin D light chain OS=Homo sapiens GN=CTSD PE=3 SV=1;>tr|F8W787|F8W787_HUMAN Cathepsin D light chain (Fragment) OS=Homo sapi…	>sp|P07339|CATD_HUMAN Cathepsin D OS=Homo sapiens GN=CTSD PE=1 SV=1;>tr|H7C469|H7C469_HUMAN Uncharacterized protein (Fragment) OS=Homo sapiens PE=3 SV=1;>tr|C9JH19|C9JH19_HUMAN Cathepsin D light chain (Fragment) OS=Homo sapiens GN=CTSD PE=3 SV=1;>tr|F8WD96	5	2	2	8.5	44.552	0	2011500	2233800	828720	730310	0	0	43111000	41385000	39133000	37020000	0
>sp|P07360|CO8G_HUMAN Complement component C8 gamma chain OS=Homo sapiens GN=C8G PE=1 SV=3;>tr|Q5SQ08|Q5SQ08_HUMAN Complement component 8, gamma polypeptide (Fragment) OS=Homo sapiens GN=C8G PE=2 SV=1	>sp|P07360|CO8G_HUMAN Complement component C8 gamma chain OS=Homo sapiens GN=C8G PE=1 SV=3;>tr|Q5SQ08|Q5SQ08_HUMAN Complement component 8, gamma polypeptide (Fragment) OS=Homo sapiens GN=C8G PE=2 SV=1	>sp|P07360|CO8G_HUMAN Complement component C8 gamma chain OS=Homo sapiens GN=C8G PE=1 SV=3;>tr|Q5SQ08|Q5SQ08_HUMAN Complement component 8, gamma polypeptide (Fragment) OS=Homo sapiens GN=C8G PE=2 SV=1	2	2	2	14.4	22.277	1420900	0	0	0	0	0	17051000	0	0	0	0	0
>sp|P07384|CAN1_HUMAN Calpain-1 catalytic subunit OS=Homo sapiens GN=CAPN1 PE=1 SV=1;>tr|B2RDI5|B2RDI5_HUMAN cDNA, FLJ96627, highly similar to Homo sapiens calpain 1, (mu/I) large subunit (CAPN1), mRNA OS=Homo sapiens PE=2 SV=1;>tr|B4DWH5|B4DWH5_HUMAN cDNA FLJ53224, highly similar to Calpain-1 catalytic subunit (EC 3.4.22.52) OS=Homo sapiens PE=2 SV=1;>tr|B4DS85|B4DS85_HUMAN cDNA FLJ56829, highly…	>sp|P07384|CAN1_HUMAN Calpain-1 catalytic subunit OS=Homo sapiens GN=CAPN1 PE=1 SV=1;>tr|B2RDI5|B2RDI5_HUMAN cDNA, FLJ96627, highly similar to Homo sapiens calpain 1, (mu/I) large subunit (CAPN1), mRNA OS=Homo sapiens PE=2 SV=1;>tr|B4DWH5|B4DWH5_HUMAN cDNA FLJ53224, highly similar to Calpain-1 catalytic subunit (EC 3.4.22.52) OS=Homo sapiens PE=2 SV=1;>tr|B4DS85|B4DS85_HUMAN cDNA FLJ56829, highly…	>sp|P07384|CAN1_HUMAN Calpain-1 catalytic subunit OS=Homo sapiens GN=CAPN1 PE=1 SV=1;>tr|B2RDI5|B2RDI5_HUMAN cDNA, FLJ96627, highly similar to Homo sapiens calpain 1, (mu/I) large subunit (CAPN1), mRNA OS=Homo sapiens PE=2 SV=1;>tr|B4DWH5|B4DWH5_HUMAN cDNA	4	1	1	2.7	81.889	0	122220	111010	0	0	0	0	4945100	4438800	0	0	0
>sp|P68371|TBB4B_HUMAN Tubulin beta-4B chain OS=Homo sapiens GN=TUBB4B PE=1 SV=1;>tr|Q8IWP6|Q8IWP6_HUMAN Class IVb beta tubulin OS=Homo sapiens PE=2 SV=1;>tr|Q8IZ29|Q8IZ29_HUMAN Tubulin, beta 2C OS=Homo sapiens GN=TUBB2C PE=2 SV=1;>sp|P07437|TBB5_HUMAN Tubulin beta chain OS=Homo sapiens GN=TUBB PE=1 SV=2;>tr|Q5SU16|Q5SU16_HUMAN Beta 5-tubulin OS=Homo sapiens GN=TUBB PE=2 SV=1;>tr|F8VW92|F8VW92_HU…	>sp|P68371|TBB4B_HUMAN Tubulin beta-4B chain OS=Homo sapiens GN=TUBB4B PE=1 SV=1;>tr|Q8IWP6|Q8IWP6_HUMAN Class IVb beta tubulin OS=Homo sapiens PE=2 SV=1;>tr|Q8IZ29|Q8IZ29_HUMAN Tubulin, beta 2C OS=Homo sapiens GN=TUBB2C PE=2 SV=1;>sp|P07437|TBB5_HUMAN Tubulin beta chain OS=Homo sapiens GN=TUBB PE=1 SV=2;>tr|Q5SU16|Q5SU16_HUMAN Beta 5-tubulin OS=Homo sapiens GN=TUBB PE=2 SV=1;>tr|F8VW92|F8VW92_HU…	>sp|P68371|TBB4B_HUMAN Tubulin beta-4B chain OS=Homo sapiens GN=TUBB4B PE=1 SV=1;>tr|Q8IWP6|Q8IWP6_HUMAN Class IVb beta tubulin OS=Homo sapiens PE=2 SV=1;>tr|Q8IZ29|Q8IZ29_HUMAN Tubulin, beta 2C OS=Homo sapiens GN=TUBB2C PE=2 SV=1;>sp|P07437|TBB5_HUMAN Tub	61	5	5	16.2	49.83	1006200	8028300	8451500	687040	530550	737360	0	120050000	151310000	70129000	60087000	74233000
>tr|B1AVU8|B1AVU8_HUMAN Prosaposin OS=Homo sapiens GN=PSAP PE=4 SV=1;>tr|Q59EN5|Q59EN5_HUMAN Prosaposin variant (Fragment) OS=Homo sapiens PE=2 SV=1;>tr|C9JIZ6|C9JIZ6_HUMAN Saposin-D OS=Homo sapiens GN=PSAP PE=4 SV=1;>sp|P07602|SAP_HUMAN Proactivator polypeptide OS=Homo sapiens GN=PSAP PE=1 SV=2;>tr|Q53FJ5|Q53FJ5_HUMAN Prosaposin (Variant Gaucher disease and variant metachromatic leukodystrophy) …	>tr|B1AVU8|B1AVU8_HUMAN Prosaposin OS=Homo sapiens GN=PSAP PE=4 SV=1;>tr|Q59EN5|Q59EN5_HUMAN Prosaposin variant (Fragment) OS=Homo sapiens PE=2 SV=1;>tr|C9JIZ6|C9JIZ6_HUMAN Saposin-D OS=Homo sapiens GN=PSAP PE=4 SV=1;>sp|P07602|SAP_HUMAN Proactivator polypeptide OS=Homo sapiens GN=PSAP PE=1 SV=2;>tr|Q53FJ5|Q53FJ5_HUMAN Prosaposin (Variant Gaucher disease and variant metachromatic leukodystrophy) …	>tr|B1AVU8|B1AVU8_HUMAN Prosaposin OS=Homo sapiens GN=PSAP PE=4 SV=1;>tr|Q59EN5|Q59EN5_HUMAN Prosaposin variant (Fragment) OS=Homo sapiens PE=2 SV=1;>tr|C9JIZ6|C9JIZ6_HUMAN Saposin-D OS=Homo sapiens GN=PSAP PE=4 SV=1;>sp|P07602|SAP_HUMAN Proactivator polyp	8	11	11	22	61.692	7589400	15867000	19452000	37101000	32842000	37516000	639150000	479280000	553970000	2653000000	2430600000	2291000000
>sp|P07737|PROF1_HUMAN Profilin-1 OS=Homo sapiens GN=PFN1 PE=1 SV=2;>tr|K7EJ44|K7EJ44_HUMAN Profilin 1, isoform CRA_b OS=Homo sapiens GN=PFN1 PE=4 SV=1;>tr|I3L3D5|I3L3D5_HUMAN Profilin-1 (Fragment) OS=Homo sapiens GN=PFN1 PE=4 SV=1;CON__P02584	>sp|P07737|PROF1_HUMAN Profilin-1 OS=Homo sapiens GN=PFN1 PE=1 SV=2;>tr|K7EJ44|K7EJ44_HUMAN Profilin 1, isoform CRA_b OS=Homo sapiens GN=PFN1 PE=4 SV=1	>sp|P07737|PROF1_HUMAN Profilin-1 OS=Homo sapiens GN=PFN1 PE=1 SV=2;>tr|K7EJ44|K7EJ44_HUMAN Profilin 1, isoform CRA_b OS=Homo sapiens GN=PFN1 PE=4 SV=1	4	8	8	73.6	15.054	92490000	73482000	80606000	45437000	46680000	47224000	1157700000	1118300000	1001900000	418530000	493220000	376590000
>sp|P07858|CATB_HUMAN Cathepsin B OS=Homo sapiens GN=CTSB PE=1 SV=3;>tr|A8K2H4|A8K2H4_HUMAN cDNA FLJ78235 OS=Homo sapiens PE=2 SV=1;>tr|B4DL49|B4DL49_HUMAN cDNA FLJ58073, moderately similar to Cathepsin B (EC 3.4.22.1) OS=Homo sapiens PE=2 SV=1;>tr|B3KUJ8|B3KUJ8_HUMAN cDNA FLJ40065 fis, clone TESOP2000400, highly similar to CATHEPSIN B (EC 3.4.22.1) OS=Homo sapiens PE=2 SV=1;>tr|B4DMY4|B4DMY4_HUM…	>sp|P07858|CATB_HUMAN Cathepsin B OS=Homo sapiens GN=CTSB PE=1 SV=3;>tr|A8K2H4|A8K2H4_HUMAN cDNA FLJ78235 OS=Homo sapiens PE=2 SV=1;>tr|B4DL49|B4DL49_HUMAN cDNA FLJ58073, moderately similar to Cathepsin B (EC 3.4.22.1) OS=Homo sapiens PE=2 SV=1;>tr|B3KUJ8|B3KUJ8_HUMAN cDNA FLJ40065 fis, clone TESOP2000400, highly similar to CATHEPSIN B (EC 3.4.22.1) OS=Homo sapiens PE=2 SV=1;>tr|B4DMY4|B4DMY4_HUM…	>sp|P07858|CATB_HUMAN Cathepsin B OS=Homo sapiens GN=CTSB PE=1 SV=3;>tr|A8K2H4|A8K2H4_HUMAN cDNA FLJ78235 OS=Homo sapiens PE=2 SV=1;>tr|B4DL49|B4DL49_HUMAN cDNA FLJ58073, moderately similar to Cathepsin B (EC 3.4.22.1) OS=Homo sapiens PE=2 SV=1;>tr|B3KUJ8|	19	4	4	13.6	37.821	0	10889000	16481000	16159000	14720000	13601000	0	159300000	204610000	796530000	740990000	774300000
>sp|P07900|HS90A_HUMAN Heat shock protein HSP 90-alpha OS=Homo sapiens GN=HSP90AA1 PE=1 SV=5;>tr|Q2VPJ6|Q2VPJ6_HUMAN HSP90AA1 protein (Fragment) OS=Homo sapiens GN=HSP90AA1 PE=2 SV=1;>tr|Q8TBA7|Q8TBA7_HUMAN HSP90AA1 protein (Fragment) OS=Homo sapiens GN=HSP90AA1 PE=2 SV=2;>tr|O75322|O75322_HUMAN Hsp89-alpha-delta-N OS=Homo sapiens PE=2 SV=1;>tr|Q86U12|Q86U12_HUMAN Full-length cDNA clone CS0CAP007…	>sp|P07900|HS90A_HUMAN Heat shock protein HSP 90-alpha OS=Homo sapiens GN=HSP90AA1 PE=1 SV=5;>tr|Q2VPJ6|Q2VPJ6_HUMAN HSP90AA1 protein (Fragment) OS=Homo sapiens GN=HSP90AA1 PE=2 SV=1;>tr|Q8TBA7|Q8TBA7_HUMAN HSP90AA1 protein (Fragment) OS=Homo sapiens GN=HSP90AA1 PE=2 SV=2;>tr|O75322|O75322_HUMAN Hsp89-alpha-delta-N OS=Homo sapiens PE=2 SV=1;>tr|Q86U12|Q86U12_HUMAN Full-length cDNA clone CS0CAP007…	>sp|P07900|HS90A_HUMAN Heat shock protein HSP 90-alpha OS=Homo sapiens GN=HSP90AA1 PE=1 SV=5;>tr|Q2VPJ6|Q2VPJ6_HUMAN HSP90AA1 protein (Fragment) OS=Homo sapiens GN=HSP90AA1 PE=2 SV=1;>tr|Q8TBA7|Q8TBA7_HUMAN HSP90AA1 protein (Fragment) OS=Homo sapiens GN=HS	15	7	4	10.2	84.659	4640900	3624300	4016300	0	0	0	138630000	151700000	142520000	0	0	0
>tr|Q59EJ3|Q59EJ3_HUMAN Heat shock 70kDa protein 1A variant (Fragment) OS=Homo sapiens PE=2 SV=1;>sp|P08107|HSP71_HUMAN Heat shock 70 kDa protein 1A/1B OS=Homo sapiens GN=HSPA1A PE=1 SV=5;>tr|A8K5I0|A8K5I0_HUMAN Heat shock 70kDa protein 1A OS=Homo sapiens GN=HSPA1B PE=2 SV=1;>tr|B4DNT8|B4DNT8_HUMAN cDNA FLJ54370, highly similar to Heat shock 70 kDa protein 1 OS=Homo sapiens PE=2 SV=1;>tr|B4DFN9|B…	>tr|Q59EJ3|Q59EJ3_HUMAN Heat shock 70kDa protein 1A variant (Fragment) OS=Homo sapiens PE=2 SV=1;>sp|P08107|HSP71_HUMAN Heat shock 70 kDa protein 1A/1B OS=Homo sapiens GN=HSPA1A PE=1 SV=5;>tr|A8K5I0|A8K5I0_HUMAN Heat shock 70kDa protein 1A OS=Homo sapiens GN=HSPA1B PE=2 SV=1;>tr|B4DNT8|B4DNT8_HUMAN cDNA FLJ54370, highly similar to Heat shock 70 kDa protein 1 OS=Homo sapiens PE=2 SV=1;>tr|B4DFN9|B…	>tr|Q59EJ3|Q59EJ3_HUMAN Heat shock 70kDa protein 1A variant (Fragment) OS=Homo sapiens PE=2 SV=1;>sp|P08107|HSP71_HUMAN Heat shock 70 kDa protein 1A/1B OS=Homo sapiens GN=HSPA1A PE=1 SV=5;>tr|A8K5I0|A8K5I0_HUMAN Heat shock 70kDa protein 1A OS=Homo sapiens	36	7	4	13.3	77.495	9109100	9926100	10915000	0	181540	135200	342370000	361300000	338070000	0	55194000	41169000
>tr|Q14UF2|Q14UF2_HUMAN Decay-accelerating factor splicing variant 5 OS=Homo sapiens GN=DAF PE=2 SV=1;>tr|Q14UF3|Q14UF3_HUMAN Decay-accelerating factor splicing variant 4 OS=Homo sapiens GN=DAF PE=2 SV=1;>tr|B1AP13|B1AP13_HUMAN CD55 molecule, decay accelerating factor for complement (Cromer blood group) OS=Homo sapiens GN=CD55 PE=4 SV=1;>tr|Q14UF6|Q14UF6_HUMAN Complement decay-accelerating factor…	>tr|Q14UF2|Q14UF2_HUMAN Decay-accelerating factor splicing variant 5 OS=Homo sapiens GN=DAF PE=2 SV=1;>tr|Q14UF3|Q14UF3_HUMAN Decay-accelerating factor splicing variant 4 OS=Homo sapiens GN=DAF PE=2 SV=1;>tr|B1AP13|B1AP13_HUMAN CD55 molecule, decay accelerating factor for complement (Cromer blood group) OS=Homo sapiens GN=CD55 PE=4 SV=1;>tr|Q14UF6|Q14UF6_HUMAN Complement decay-accelerating factor…	>tr|Q14UF2|Q14UF2_HUMAN Decay-accelerating factor splicing variant 5 OS=Homo sapiens GN=DAF PE=2 SV=1;>tr|Q14UF3|Q14UF3_HUMAN Decay-accelerating factor splicing variant 4 OS=Homo sapiens GN=DAF PE=2 SV=1;>tr|B1AP13|B1AP13_HUMAN CD55 molecule, decay acceler	13	1	1	1.3	59.037	0	858540	1112900	522510	518740	381790	0	30846000	35471000	41663000	43587000	30599000
>sp|P08185|CBG_HUMAN Corticosteroid-binding globulin OS=Homo sapiens GN=SERPINA6 PE=1 SV=1;>tr|B2R9F2|B2R9F2_HUMAN cDNA, FLJ94361, highly similar to Homo sapiens serine (or cysteine) proteinase inhibitor, clade A(alpha-1 antiproteinase, antitrypsin), member 6 (SERPINA6), mRNA OS=Homo sapiens PE=2 SV=1;>tr|G3V350|G3V350_HUMAN Corticosteroid-binding globulin OS=Homo sapiens GN=SERPINA6 PE=3 SV=1;>t…	>sp|P08185|CBG_HUMAN Corticosteroid-binding globulin OS=Homo sapiens GN=SERPINA6 PE=1 SV=1;>tr|B2R9F2|B2R9F2_HUMAN cDNA, FLJ94361, highly similar to Homo sapiens serine (or cysteine) proteinase inhibitor, clade A(alpha-1 antiproteinase, antitrypsin), member 6 (SERPINA6), mRNA OS=Homo sapiens PE=2 SV=1;>tr|G3V350|G3V350_HUMAN Corticosteroid-binding globulin OS=Homo sapiens GN=SERPINA6 PE=3 SV=1;>t…	>sp|P08185|CBG_HUMAN Corticosteroid-binding globulin OS=Homo sapiens GN=SERPINA6 PE=1 SV=1;>tr|B2R9F2|B2R9F2_HUMAN cDNA, FLJ94361, highly similar to Homo sapiens serine (or cysteine) proteinase inhibitor, clade A(alpha-1 antiproteinase, antitrypsin), membe	4	2	2	4	45.14	10052000	8044400	10252000	0	0	0	174340000	142210000	170270000	0	0	0
>sp|P08238|HS90B_HUMAN Heat shock protein HSP 90-beta OS=Homo sapiens GN=HSP90AB1 PE=1 SV=4;>tr|B4DMA2|B4DMA2_HUMAN cDNA FLJ54023, highly similar to Heat shock protein HSP 90-beta OS=Homo sapiens PE=2 SV=1;>tr|B4DGL0|B4DGL0_HUMAN cDNA FLJ53619, highly similar to Heat shock protein HSP 90-beta OS=Homo sapiens PE=2 SV=1;>tr|Q6PK50|Q6PK50_HUMAN HSP90AB1 protein (Fragment) OS=Homo sapiens GN=HSP90AB1…	>sp|P08238|HS90B_HUMAN Heat shock protein HSP 90-beta OS=Homo sapiens GN=HSP90AB1 PE=1 SV=4;>tr|B4DMA2|B4DMA2_HUMAN cDNA FLJ54023, highly similar to Heat shock protein HSP 90-beta OS=Homo sapiens PE=2 SV=1;>tr|B4DGL0|B4DGL0_HUMAN cDNA FLJ53619, highly similar to Heat shock protein HSP 90-beta OS=Homo sapiens PE=2 SV=1;>tr|Q6PK50|Q6PK50_HUMAN HSP90AB1 protein (Fragment) OS=Homo sapiens GN=HSP90AB1…	>sp|P08238|HS90B_HUMAN Heat shock protein HSP 90-beta OS=Homo sapiens GN=HSP90AB1 PE=1 SV=4;>tr|B4DMA2|B4DMA2_HUMAN cDNA FLJ54023, highly similar to Heat shock protein HSP 90-beta OS=Homo sapiens PE=2 SV=1;>tr|B4DGL0|B4DGL0_HUMAN cDNA FLJ53619, highly simi	19	5	2	7.5	83.263	1473400	2204700	778600	131890	0	154020	0	22452000	24529000	13838000	0	15399000
>sp|P08263|GSTA1_HUMAN Glutathione S-transferase A1 OS=Homo sapiens GN=GSTA1 PE=1 SV=3;>sp|P09210|GSTA2_HUMAN Glutathione S-transferase A2 OS=Homo sapiens GN=GSTA2 PE=1 SV=4;>tr|A8K987|A8K987_HUMAN Glutathione S-transferase OS=Homo sapiens PE=2 SV=1;>tr|B2R920|B2R920_HUMAN Glutathione S-transferase OS=Homo sapiens PE=2 SV=1;>tr|B7Z1F9|B7Z1F9_HUMAN Glutathione S-transferase OS=Homo sapiens PE=2 SV…	>sp|P08263|GSTA1_HUMAN Glutathione S-transferase A1 OS=Homo sapiens GN=GSTA1 PE=1 SV=3;>sp|P09210|GSTA2_HUMAN Glutathione S-transferase A2 OS=Homo sapiens GN=GSTA2 PE=1 SV=4;>tr|A8K987|A8K987_HUMAN Glutathione S-transferase OS=Homo sapiens PE=2 SV=1;>tr|B2R920|B2R920_HUMAN Glutathione S-transferase OS=Homo sapiens PE=2 SV=1;>tr|B7Z1F9|B7Z1F9_HUMAN Glutathione S-transferase OS=Homo sapiens PE=2 SV…	>sp|P08263|GSTA1_HUMAN Glutathione S-transferase A1 OS=Homo sapiens GN=GSTA1 PE=1 SV=3;>sp|P09210|GSTA2_HUMAN Glutathione S-transferase A2 OS=Homo sapiens GN=GSTA2 PE=1 SV=4;>tr|A8K987|A8K987_HUMAN Glutathione S-transferase OS=Homo sapiens PE=2 SV=1;>tr|B2	8	2	2	7.7	25.631	9623600	6745700	7771300	0	0	0	79818000	83966000	85813000	0	0	0
>sp|P08294|SODE_HUMAN Extracellular superoxide dismutase [Cu-Zn] OS=Homo sapiens GN=SOD3 PE=1 SV=2;>tr|B2R9V7|B2R9V7_HUMAN Superoxide dismutase [Cu-Zn] OS=Homo sapiens PE=2 SV=1	>sp|P08294|SODE_HUMAN Extracellular superoxide dismutase [Cu-Zn] OS=Homo sapiens GN=SOD3 PE=1 SV=2;>tr|B2R9V7|B2R9V7_HUMAN Superoxide dismutase [Cu-Zn] OS=Homo sapiens PE=2 SV=1	>sp|P08294|SODE_HUMAN Extracellular superoxide dismutase [Cu-Zn] OS=Homo sapiens GN=SOD3 PE=1 SV=2;>tr|B2R9V7|B2R9V7_HUMAN Superoxide dismutase [Cu-Zn] OS=Homo sapiens PE=2 SV=1	2	1	1	5.8	25.851	1499400	1481800	1577300	165450	173160	0	12331000	12878000	12160000	2653100	2855300	0
>sp|P08571|CD14_HUMAN Monocyte differentiation antigen CD14 OS=Homo sapiens GN=CD14 PE=1 SV=2;>tr|B2R888|B2R888_HUMAN Monocyte differentiation antigen CD14 OS=Homo sapiens PE=2 SV=1;>tr|F1C4A7|F1C4A7_HUMAN Monocyte differentiation antigen CD14 OS=Homo sapiens GN=CD14 PE=3 SV=1;>tr|D6RFL4|D6RFL4_HUMAN Monocyte differentiation antigen CD14, urinary form (Fragment) OS=Homo sapiens GN=CD14 PE=4 SV=1	>sp|P08571|CD14_HUMAN Monocyte differentiation antigen CD14 OS=Homo sapiens GN=CD14 PE=1 SV=2;>tr|B2R888|B2R888_HUMAN Monocyte differentiation antigen CD14 OS=Homo sapiens PE=2 SV=1;>tr|F1C4A7|F1C4A7_HUMAN Monocyte differentiation antigen CD14 OS=Homo sapiens GN=CD14 PE=3 SV=1;>tr|D6RFL4|D6RFL4_HUMAN Monocyte differentiation antigen CD14, urinary form (Fragment) OS=Homo sapiens GN=CD14 PE=4 SV=1	>sp|P08571|CD14_HUMAN Monocyte differentiation antigen CD14 OS=Homo sapiens GN=CD14 PE=1 SV=2;>tr|B2R888|B2R888_HUMAN Monocyte differentiation antigen CD14 OS=Homo sapiens PE=2 SV=1;>tr|F1C4A7|F1C4A7_HUMAN Monocyte differentiation antigen CD14 OS=Homo sapi	4	2	2	8	40.076	1545300	1620700	1682300	1467500	1342600	2537100	28065000	31106000	28644000	62506000	60262000	61942000
>sp|P08603|CFAH_HUMAN Complement factor H OS=Homo sapiens GN=CFH PE=1 SV=4;>tr|A8K5T0|A8K5T0_HUMAN cDNA FLJ75416, highly similar to Homo sapiens complement factor H (CFH), mRNA OS=Homo sapiens PE=2 SV=1;>tr|F8WDX4|F8WDX4_HUMAN Complement factor H OS=Homo sapiens GN=CFH PE=4 SV=1;>tr|Q14006|Q14006_HUMAN HF protein (Fragment) OS=Homo sapiens PE=2 SV=1;>tr|Q5TFM2|Q5TFM2_HUMAN Complement factor H OS=…	>sp|P08603|CFAH_HUMAN Complement factor H OS=Homo sapiens GN=CFH PE=1 SV=4;>tr|A8K5T0|A8K5T0_HUMAN cDNA FLJ75416, highly similar to Homo sapiens complement factor H (CFH), mRNA OS=Homo sapiens PE=2 SV=1;>tr|F8WDX4|F8WDX4_HUMAN Complement factor H OS=Homo sapiens GN=CFH PE=4 SV=1	>sp|P08603|CFAH_HUMAN Complement factor H OS=Homo sapiens GN=CFH PE=1 SV=4;>tr|A8K5T0|A8K5T0_HUMAN cDNA FLJ75416, highly similar to Homo sapiens complement factor H (CFH), mRNA OS=Homo sapiens PE=2 SV=1;>tr|F8WDX4|F8WDX4_HUMAN Complement factor H OS=Homo s	11	19	19	18.4	139.09	13460000	16767000	18293000	2388700	2307600	2419300	933050000	1105800000	1052500000	427320000	452060000	528870000
>sp|P08697|A2AP_HUMAN Alpha-2-antiplasmin OS=Homo sapiens GN=SERPINF2 PE=1 SV=3;>tr|C9JMH6|C9JMH6_HUMAN Alpha-2-antiplasmin (Fragment) OS=Homo sapiens GN=SERPINF2 PE=3 SV=1;>tr|C9JPV4|C9JPV4_HUMAN Alpha-2-antiplasmin (Fragment) OS=Homo sapiens GN=SERPINF2 PE=3 SV=1	>sp|P08697|A2AP_HUMAN Alpha-2-antiplasmin OS=Homo sapiens GN=SERPINF2 PE=1 SV=3;>tr|C9JMH6|C9JMH6_HUMAN Alpha-2-antiplasmin (Fragment) OS=Homo sapiens GN=SERPINF2 PE=3 SV=1;>tr|C9JPV4|C9JPV4_HUMAN Alpha-2-antiplasmin (Fragment) OS=Homo sapiens GN=SERPINF2 PE=3 SV=1	>sp|P08697|A2AP_HUMAN Alpha-2-antiplasmin OS=Homo sapiens GN=SERPINF2 PE=1 SV=3;>tr|C9JMH6|C9JMH6_HUMAN Alpha-2-antiplasmin (Fragment) OS=Homo sapiens GN=SERPINF2 PE=3 SV=1;>tr|C9JPV4|C9JPV4_HUMAN Alpha-2-antiplasmin (Fragment) OS=Homo sapiens GN=SERPINF2	3	4	3	8.1	54.565	3379100	3356500	2911000	0	0	0	65516000	78268000	98473000	0	0	0
>sp|P09211|GSTP1_HUMAN Glutathione S-transferase P OS=Homo sapiens GN=GSTP1 PE=1 SV=2;>tr|A8MX94|A8MX94_HUMAN Glutathione S-transferase P OS=Homo sapiens GN=GSTP1 PE=3 SV=1;>tr|C7DJS1|C7DJS1_HUMAN Glutathione S-transferase pi (Fragment) OS=Homo sapiens GN=GSTP1 PE=2 SV=1;>tr|C7DJS2|C7DJS2_HUMAN Glutathione S-transferase pi (Fragment) OS=Homo sapiens GN=GSTP1 PE=2 SV=1;>tr|Q5D6A5|Q5D6A5_HUMAN Muta…	>sp|P09211|GSTP1_HUMAN Glutathione S-transferase P OS=Homo sapiens GN=GSTP1 PE=1 SV=2;>tr|A8MX94|A8MX94_HUMAN Glutathione S-transferase P OS=Homo sapiens GN=GSTP1 PE=3 SV=1	>sp|P09211|GSTP1_HUMAN Glutathione S-transferase P OS=Homo sapiens GN=GSTP1 PE=1 SV=2;>tr|A8MX94|A8MX94_HUMAN Glutathione S-transferase P OS=Homo sapiens GN=GSTP1 PE=3 SV=1	6	8	8	58.6	23.356	119480000	103830000	124480000	14430000	13058000	8401500	1232400000	1276800000	1120200000	337460000	327570000	316050000
>sp|P09228|CYTT_HUMAN Cystatin-SA OS=Homo sapiens GN=CST2 PE=1 SV=1	>sp|P09228|CYTT_HUMAN Cystatin-SA OS=Homo sapiens GN=CST2 PE=1 SV=1	>sp|P09228|CYTT_HUMAN Cystatin-SA OS=Homo sapiens GN=CST2 PE=1 SV=1	1	5	1	34.8	16.445	0	5649200	6564900	2282500	2542100	1813900	0	46869000	47589000	44382000	48081000	39667000
>sp|P09467|F16P1_HUMAN Fructose-1,6-bisphosphatase 1 OS=Homo sapiens GN=FBP1 PE=1 SV=5;>tr|Q2TU34|Q2TU34_HUMAN Fructose-1,6-bisphosphatase 1 OS=Homo sapiens GN=FBP1 PE=2 SV=1	>sp|P09467|F16P1_HUMAN Fructose-1,6-bisphosphatase 1 OS=Homo sapiens GN=FBP1 PE=1 SV=5;>tr|Q2TU34|Q2TU34_HUMAN Fructose-1,6-bisphosphatase 1 OS=Homo sapiens GN=FBP1 PE=2 SV=1	>sp|P09467|F16P1_HUMAN Fructose-1,6-bisphosphatase 1 OS=Homo sapiens GN=FBP1 PE=1 SV=5;>tr|Q2TU34|Q2TU34_HUMAN Fructose-1,6-bisphosphatase 1 OS=Homo sapiens GN=FBP1 PE=2 SV=1	2	1	1	4.7	36.842	1494200	1536200	1497700	131930	183190	194550	33791000	36711000	31752000	6098400	8269200	8354800
>sp|P09651|ROA1_HUMAN Heterogeneous nuclear ribonucleoprotein A1 OS=Homo sapiens GN=HNRNPA1 PE=1 SV=5;>tr|F8W1S7|F8W1S7_HUMAN Heterogeneous nuclear ribonucleoprotein A1 OS=Homo sapiens GN=HNRNPA1 PE=4 SV=1;>tr|F8W6I7|F8W6I7_HUMAN Heterogeneous nuclear ribonucleoprotein A1 OS=Homo sapiens GN=HNRNPA1 PE=4 SV=1;>tr|Q0VAC0|Q0VAC0_HUMAN Heterogeneous nuclear ribonucleoprotein A1 OS=Homo sapiens GN=HNR…	>sp|P09651|ROA1_HUMAN Heterogeneous nuclear ribonucleoprotein A1 OS=Homo sapiens GN=HNRNPA1 PE=1 SV=5;>tr|F8W1S7|F8W1S7_HUMAN Heterogeneous nuclear ribonucleoprotein A1 OS=Homo sapiens GN=HNRNPA1 PE=4 SV=1;>tr|F8W6I7|F8W6I7_HUMAN Heterogeneous nuclear ribonucleoprotein A1 OS=Homo sapiens GN=HNRNPA1 PE=4 SV=1;>tr|Q0VAC0|Q0VAC0_HUMAN Heterogeneous nuclear ribonucleoprotein A1 OS=Homo sapiens GN=HNR…	>sp|P09651|ROA1_HUMAN Heterogeneous nuclear ribonucleoprotein A1 OS=Homo sapiens GN=HNRNPA1 PE=1 SV=5;>tr|F8W1S7|F8W1S7_HUMAN Heterogeneous nuclear ribonucleoprotein A1 OS=Homo sapiens GN=HNRNPA1 PE=4 SV=1;>tr|F8W6I7|F8W6I7_HUMAN Heterogeneous nuclear ribo	13	1	1	3.2	38.746	0	529540	450910	0	0	0	0	8174900	6780600	0	0	0
>tr|Q59EM9|Q59EM9_HUMAN Ubiquitin C variant (Fragment) OS=Homo sapiens PE=2 SV=1;>tr|Q66K58|Q66K58_HUMAN Putative uncharacterized protein (Fragment) OS=Homo sapiens PE=2 SV=1;>sp|P0CG48|UBC_HUMAN Polyubiquitin-C OS=Homo sapiens GN=UBC PE=1 SV=3;>tr|A8K674|A8K674_HUMAN cDNA FLJ75516, highly similar to Xenopus tropicalis ubiquitin C, mRNA OS=Homo sapiens PE=2 SV=1;>tr|F5H041|F5H041_HUMAN Polyubiqui…	>tr|Q59EM9|Q59EM9_HUMAN Ubiquitin C variant (Fragment) OS=Homo sapiens PE=2 SV=1;>tr|Q66K58|Q66K58_HUMAN Putative uncharacterized protein (Fragment) OS=Homo sapiens PE=2 SV=1;>sp|P0CG48|UBC_HUMAN Polyubiquitin-C OS=Homo sapiens GN=UBC PE=1 SV=3;>tr|A8K674|A8K674_HUMAN cDNA FLJ75516, highly similar to Xenopus tropicalis ubiquitin C, mRNA OS=Homo sapiens PE=2 SV=1;>tr|F5H041|F5H041_HUMAN Polyubiqui…	>tr|Q59EM9|Q59EM9_HUMAN Ubiquitin C variant (Fragment) OS=Homo sapiens PE=2 SV=1;>tr|Q66K58|Q66K58_HUMAN Putative uncharacterized protein (Fragment) OS=Homo sapiens PE=2 SV=1;>sp|P0CG48|UBC_HUMAN Polyubiquitin-C OS=Homo sapiens GN=UBC PE=1 SV=3;>tr|A8K674|	39	3	3	44.2	147.33	3737200	4141300	4180700	828600	1048000	1612900	331440000	393010000	356640000	188420000	194420000	228580000
>sp|P16402|H13_HUMAN Histone H1.3 OS=Homo sapiens GN=HIST1H1D PE=1 SV=2;>sp|P10412|H14_HUMAN Histone H1.4 OS=Homo sapiens GN=HIST1H1E PE=1 SV=2;>tr|A3R0T7|A3R0T7_HUMAN Liver histone H1e OS=Homo sapiens PE=2 SV=1;>tr|A3R0T8|A3R0T8_HUMAN Histone 1, H1e OS=Homo sapiens GN=HIST1H1E PE=2 SV=1;>tr|B2R984|B2R984_HUMAN cDNA, FLJ94268, highly similar to Homo sapiens histone 1, H1e (HIST1H1E), mRNA OS=Homo…	>sp|P16402|H13_HUMAN Histone H1.3 OS=Homo sapiens GN=HIST1H1D PE=1 SV=2;>sp|P10412|H14_HUMAN Histone H1.4 OS=Homo sapiens GN=HIST1H1E PE=1 SV=2;>tr|A3R0T7|A3R0T7_HUMAN Liver histone H1e OS=Homo sapiens PE=2 SV=1;>tr|A3R0T8|A3R0T8_HUMAN Histone 1, H1e OS=Homo sapiens GN=HIST1H1E PE=2 SV=1;>tr|B2R984|B2R984_HUMAN cDNA, FLJ94268, highly similar to Homo sapiens histone 1, H1e (HIST1H1E), mRNA OS=Homo…	>sp|P16402|H13_HUMAN Histone H1.3 OS=Homo sapiens GN=HIST1H1D PE=1 SV=2;>sp|P10412|H14_HUMAN Histone H1.4 OS=Homo sapiens GN=HIST1H1E PE=1 SV=2;>tr|A3R0T7|A3R0T7_HUMAN Liver histone H1e OS=Homo sapiens PE=2 SV=1;>tr|A3R0T8|A3R0T8_HUMAN Histone 1, H1e OS=Ho	10	1	1	5	22.35	7186200	0	8900300	1975000	2366000	2244900	72020000	0	83619000	47148000	57253000	52684000
>sp|P10599|THIO_HUMAN Thioredoxin OS=Homo sapiens GN=TXN PE=1 SV=3;>tr|H9ZYJ2|H9ZYJ2_HUMAN Thioredoxin OS=Homo sapiens GN=TXN PE=3 SV=1;>tr|B1ALW1|B1ALW1_HUMAN Thioredoxin OS=Homo sapiens GN=TXN PE=4 SV=1;>tr|O60744|O60744_HUMAN Thioredoxin delta 3 (Fragment) OS=Homo sapiens GN=TXN delta 3 PE=2 SV=1	>sp|P10599|THIO_HUMAN Thioredoxin OS=Homo sapiens GN=TXN PE=1 SV=3;>tr|H9ZYJ2|H9ZYJ2_HUMAN Thioredoxin OS=Homo sapiens GN=TXN PE=3 SV=1;>tr|B1ALW1|B1ALW1_HUMAN Thioredoxin OS=Homo sapiens GN=TXN PE=4 SV=1;>tr|O60744|O60744_HUMAN Thioredoxin delta 3 (Fragment) OS=Homo sapiens GN=TXN delta 3 PE=2 SV=1	>sp|P10599|THIO_HUMAN Thioredoxin OS=Homo sapiens GN=TXN PE=1 SV=3;>tr|H9ZYJ2|H9ZYJ2_HUMAN Thioredoxin OS=Homo sapiens GN=TXN PE=3 SV=1;>tr|B1ALW1|B1ALW1_HUMAN Thioredoxin OS=Homo sapiens GN=TXN PE=4 SV=1;>tr|O60744|O60744_HUMAN Thioredoxin delta 3 (Fragme	4	1	1	12.4	11.737	27603000	30985000	27924000	5949100	6140900	5863500	193220000	229200000	183240000	97661000	106230000	96751000
>sp|P10643|CO7_HUMAN Complement component C7 OS=Homo sapiens GN=C7 PE=1 SV=2;>tr|A8K2T4|A8K2T4_HUMAN cDNA FLJ78207, highly similar to Human complement protein component C7 mRNA OS=Homo sapiens PE=2 SV=1;>tr|B2R6W1|B2R6W1_HUMAN cDNA, FLJ93143, highly similar to Homo sapiens complement component 7 (C7), mRNA OS=Homo sapiens PE=2 SV=1;>tr|B4E3S6|B4E3S6_HUMAN cDNA FLJ58413, highly similar to Compleme…	>sp|P10643|CO7_HUMAN Complement component C7 OS=Homo sapiens GN=C7 PE=1 SV=2;>tr|A8K2T4|A8K2T4_HUMAN cDNA FLJ78207, highly similar to Human complement protein component C7 mRNA OS=Homo sapiens PE=2 SV=1;>tr|B2R6W1|B2R6W1_HUMAN cDNA, FLJ93143, highly similar to Homo sapiens complement component 7 (C7), mRNA OS=Homo sapiens PE=2 SV=1;>tr|B4E3S6|B4E3S6_HUMAN cDNA FLJ58413, highly similar to Compleme…	>sp|P10643|CO7_HUMAN Complement component C7 OS=Homo sapiens GN=C7 PE=1 SV=2;>tr|A8K2T4|A8K2T4_HUMAN cDNA FLJ78207, highly similar to Human complement protein component C7 mRNA OS=Homo sapiens PE=2 SV=1;>tr|B2R6W1|B2R6W1_HUMAN cDNA, FLJ93143, highly simila	5	4	4	5	93.517	0	428090	1272500	0	113120	30164	0	37373000	80689000	0	10927000	8505000
>sp|P10909|CLUS_HUMAN Clusterin OS=Homo sapiens GN=CLU PE=1 SV=1;>tr|E7ETA7|E7ETA7_HUMAN Clusterin OS=Homo sapiens GN=CLU PE=3 SV=1;>tr|H0YC35|H0YC35_HUMAN Clusterin (Fragment) OS=Homo sapiens GN=CLU PE=3 SV=1;>tr|H0YLK8|H0YLK8_HUMAN Clusterin beta chain (Fragment) OS=Homo sapiens GN=CLU PE=4 SV=1;>tr|B4DW11|B4DW11_HUMAN cDNA FLJ57622, highly similar to Clusterin OS=Homo sapiens PE=2 SV=1;>tr|E7E…	>sp|P10909|CLUS_HUMAN Clusterin OS=Homo sapiens GN=CLU PE=1 SV=1;>tr|E7ETA7|E7ETA7_HUMAN Clusterin OS=Homo sapiens GN=CLU PE=3 SV=1;>tr|H0YC35|H0YC35_HUMAN Clusterin (Fragment) OS=Homo sapiens GN=CLU PE=3 SV=1;>tr|H0YLK8|H0YLK8_HUMAN Clusterin beta chain (Fragment) OS=Homo sapiens GN=CLU PE=4 SV=1;>tr|B4DW11|B4DW11_HUMAN cDNA FLJ57622, highly similar to Clusterin OS=Homo sapiens PE=2 SV=1	>sp|P10909|CLUS_HUMAN Clusterin OS=Homo sapiens GN=CLU PE=1 SV=1;>tr|E7ETA7|E7ETA7_HUMAN Clusterin OS=Homo sapiens GN=CLU PE=3 SV=1;>tr|H0YC35|H0YC35_HUMAN Clusterin (Fragment) OS=Homo sapiens GN=CLU PE=3 SV=1;>tr|H0YLK8|H0YLK8_HUMAN Clusterin beta chain (	15	13	13	31.2	52.494	245730000	245140000	305260000	160370000	181500000	181750000	4902200000	4774000000	4935700000	7573200000	8531500000	8155000000
>sp|P11142|HSP7C_HUMAN Heat shock cognate 71 kDa protein OS=Homo sapiens GN=HSPA8 PE=1 SV=1;>tr|Q53GZ6|Q53GZ6_HUMAN Heat shock 70kDa protein 8 isoform 1 variant (Fragment) OS=Homo sapiens PE=2 SV=1;>tr|E9PKE3|E9PKE3_HUMAN Heat shock cognate 71 kDa protein OS=Homo sapiens GN=HSPA8 PE=3 SV=1;>tr|B3KTV0|B3KTV0_HUMAN cDNA FLJ38781 fis, clone LIVER2000216, highly similar to HEAT SHOCK COGNATE 71 kDa P…	>sp|P11142|HSP7C_HUMAN Heat shock cognate 71 kDa protein OS=Homo sapiens GN=HSPA8 PE=1 SV=1;>tr|Q53GZ6|Q53GZ6_HUMAN Heat shock 70kDa protein 8 isoform 1 variant (Fragment) OS=Homo sapiens PE=2 SV=1;>tr|E9PKE3|E9PKE3_HUMAN Heat shock cognate 71 kDa protein OS=Homo sapiens GN=HSPA8 PE=3 SV=1;>tr|B3KTV0|B3KTV0_HUMAN cDNA FLJ38781 fis, clone LIVER2000216, highly similar to HEAT SHOCK COGNATE 71 kDa P…	>sp|P11142|HSP7C_HUMAN Heat shock cognate 71 kDa protein OS=Homo sapiens GN=HSPA8 PE=1 SV=1;>tr|Q53GZ6|Q53GZ6_HUMAN Heat shock 70kDa protein 8 isoform 1 variant (Fragment) OS=Homo sapiens PE=2 SV=1;>tr|E9PKE3|E9PKE3_HUMAN Heat shock cognate 71 kDa protein	17	5	3	11.3	70.897	0	0	1149000	0	0	0	0	0	37810000	0	0	0
>sp|P12273|PIP_HUMAN Prolactin-inducible protein OS=Homo sapiens GN=PIP PE=1 SV=1	>sp|P12273|PIP_HUMAN Prolactin-inducible protein OS=Homo sapiens GN=PIP PE=1 SV=1	>sp|P12273|PIP_HUMAN Prolactin-inducible protein OS=Homo sapiens GN=PIP PE=1 SV=1	1	7	7	62.3	16.572	3487600000	3463100000	3569100000	5338000000	5080000000	4670800000	28861000000	29509000000	25788000000	118360000000	118240000000	105550000000
>tr|Q9UII7|Q9UII7_HUMAN E-cadherin OS=Homo sapiens PE=2 SV=1;>sp|P12830|CADH1_HUMAN Cadherin-1 OS=Homo sapiens GN=CDH1 PE=1 SV=3;>tr|D3XNU5|D3XNU5_HUMAN E-cadherin 1 OS=Homo sapiens GN=CDH1 PE=3 SV=1;>tr|Q9UII8|Q9UII8_HUMAN Cadherin 1, type 1, E-cadherin (Epithelial), isoform CRA_c OS=Homo sapiens GN=CDH1 PE=2 SV=1;>tr|B3GN61|B3GN61_HUMAN Truncated E-cadherin OS=Homo sapiens GN=CDH1 PE=2 SV=1;>tr…	>tr|Q9UII7|Q9UII7_HUMAN E-cadherin OS=Homo sapiens PE=2 SV=1;>sp|P12830|CADH1_HUMAN Cadherin-1 OS=Homo sapiens GN=CDH1 PE=1 SV=3;>tr|D3XNU5|D3XNU5_HUMAN E-cadherin 1 OS=Homo sapiens GN=CDH1 PE=3 SV=1;>tr|Q9UII8|Q9UII8_HUMAN Cadherin 1, type 1, E-cadherin (Epithelial), isoform CRA_c OS=Homo sapiens GN=CDH1 PE=2 SV=1;>tr|B3GN61|B3GN61_HUMAN Truncated E-cadherin OS=Homo sapiens GN=CDH1 PE=2 SV=1;>tr…	>tr|Q9UII7|Q9UII7_HUMAN E-cadherin OS=Homo sapiens PE=2 SV=1;>sp|P12830|CADH1_HUMAN Cadherin-1 OS=Homo sapiens GN=CDH1 PE=1 SV=3;>tr|D3XNU5|D3XNU5_HUMAN E-cadherin 1 OS=Homo sapiens GN=CDH1 PE=3 SV=1;>tr|Q9UII8|Q9UII8_HUMAN Cadherin 1, type 1, E-cadherin (	9	2	2	2.1	99.692	0	969990	649570	4210000	3830000	3929100	0	63110000	48644000	268560000	224170000	207420000
>sp|P13489|RINI_HUMAN Ribonuclease inhibitor OS=Homo sapiens GN=RNH1 PE=1 SV=2	>sp|P13489|RINI_HUMAN Ribonuclease inhibitor OS=Homo sapiens GN=RNH1 PE=1 SV=2	>sp|P13489|RINI_HUMAN Ribonuclease inhibitor OS=Homo sapiens GN=RNH1 PE=1 SV=2	1	1	1	2.6	49.973	582140	0	0	0	0	0	15136000	0	0	0	0	0
>sp|P13671|CO6_HUMAN Complement component C6 OS=Homo sapiens GN=C6 PE=1 SV=3;>tr|A8K8Z4|A8K8Z4_HUMAN cDNA FLJ78071, highly similar to Human MHC class III complement component C6 mRNA OS=Homo sapiens PE=2 SV=1	>sp|P13671|CO6_HUMAN Complement component C6 OS=Homo sapiens GN=C6 PE=1 SV=3;>tr|A8K8Z4|A8K8Z4_HUMAN cDNA FLJ78071, highly similar to Human MHC class III complement component C6 mRNA OS=Homo sapiens PE=2 SV=1	>sp|P13671|CO6_HUMAN Complement component C6 OS=Homo sapiens GN=C6 PE=1 SV=3;>tr|A8K8Z4|A8K8Z4_HUMAN cDNA FLJ78071, highly similar to Human MHC class III complement component C6 mRNA OS=Homo sapiens PE=2 SV=1	2	1	1	1.9	104.79	0	233590	182960	0	0	0	0	10338000	7867600	0	0	0
>tr|Q5W0H4|Q5W0H4_HUMAN Translationally-controlled tumor protein OS=Homo sapiens GN=TPT1 PE=2 SV=1;>sp|P13693|TCTP_HUMAN Translationally-controlled tumor protein OS=Homo sapiens GN=TPT1 PE=1 SV=1;>tr|E9PJF7|E9PJF7_HUMAN Translationally-controlled tumor protein (Fragment) OS=Homo sapiens GN=TPT1 PE=4 SV=1;>tr|J3KPG2|J3KPG2_HUMAN Translationally-controlled tumor protein OS=Homo sapiens GN=TPT1 PE=4…	>tr|Q5W0H4|Q5W0H4_HUMAN Translationally-controlled tumor protein OS=Homo sapiens GN=TPT1 PE=2 SV=1;>sp|P13693|TCTP_HUMAN Translationally-controlled tumor protein OS=Homo sapiens GN=TPT1 PE=1 SV=1;>tr|E9PJF7|E9PJF7_HUMAN Translationally-controlled tumor protein (Fragment) OS=Homo sapiens GN=TPT1 PE=4 SV=1;>tr|J3KPG2|J3KPG2_HUMAN Translationally-controlled tumor protein OS=Homo sapiens GN=TPT1 PE=4…	>tr|Q5W0H4|Q5W0H4_HUMAN Translationally-controlled tumor protein OS=Homo sapiens GN=TPT1 PE=2 SV=1;>sp|P13693|TCTP_HUMAN Translationally-controlled tumor protein OS=Homo sapiens GN=TPT1 PE=1 SV=1;>tr|E9PJF7|E9PJF7_HUMAN Translationally-controlled tumor pro	6	2	2	5.3	21.525	7199900	6269300	7738500	640180	358860	522140	53818000	49366000	54417000	5042000	5973900	7638600
>sp|P13796|PLSL_HUMAN Plastin-2 OS=Homo sapiens GN=LCP1 PE=1 SV=6;>tr|Q53FI1|Q53FI1_HUMAN L-plastin variant (Fragment) OS=Homo sapiens PE=2 SV=1;>sp|P13797|PLST_HUMAN Plastin-3 OS=Homo sapiens GN=PLS3 PE=1 SV=4;>tr|Q53GY0|Q53GY0_HUMAN Plastin 3 variant (Fragment) OS=Homo sapiens PE=2 SV=1;>tr|B4DGB4|B4DGB4_HUMAN Plastin-3 OS=Homo sapiens GN=PLS3 PE=2 SV=1;>tr|B4DPW9|B4DPW9_HUMAN cDNA FLJ51929, hi…	>sp|P13796|PLSL_HUMAN Plastin-2 OS=Homo sapiens GN=LCP1 PE=1 SV=6;>tr|Q53FI1|Q53FI1_HUMAN L-plastin variant (Fragment) OS=Homo sapiens PE=2 SV=1;>sp|P13797|PLST_HUMAN Plastin-3 OS=Homo sapiens GN=PLS3 PE=1 SV=4;>tr|Q53GY0|Q53GY0_HUMAN Plastin 3 variant (Fragment) OS=Homo sapiens PE=2 SV=1;>tr|B4DGB4|B4DGB4_HUMAN Plastin-3 OS=Homo sapiens GN=PLS3 PE=2 SV=1;>tr|B4DPW9|B4DPW9_HUMAN cDNA FLJ51929, hi…	>sp|P13796|PLSL_HUMAN Plastin-2 OS=Homo sapiens GN=LCP1 PE=1 SV=6;>tr|Q53FI1|Q53FI1_HUMAN L-plastin variant (Fragment) OS=Homo sapiens PE=2 SV=1;>sp|P13797|PLST_HUMAN Plastin-3 OS=Homo sapiens GN=PLS3 PE=1 SV=4;>tr|Q53GY0|Q53GY0_HUMAN Plastin 3 variant (Fr	12	2	2	5.4	70.288	1617100	1123900	652740	136840	127550	115720	30723000	51343000	26453000	11123000	10954000	9676500
>tr|B4DJQ5|B4DJQ5_HUMAN cDNA FLJ59211, highly similar to Glucosidase 2 subunit beta OS=Homo sapiens PE=2 SV=1;>tr|K7ELL7|K7ELL7_HUMAN Glucosidase 2 subunit beta OS=Homo sapiens GN=PRKCSH PE=4 SV=1;>sp|P14314|GLU2B_HUMAN Glucosidase 2 subunit beta OS=Homo sapiens GN=PRKCSH PE=1 SV=2;>tr|A2VCQ4|A2VCQ4_HUMAN PRKCSH protein (Fragment) OS=Homo sapiens GN=PRKCSH PE=2 SV=1	>tr|B4DJQ5|B4DJQ5_HUMAN cDNA FLJ59211, highly similar to Glucosidase 2 subunit beta OS=Homo sapiens PE=2 SV=1;>tr|K7ELL7|K7ELL7_HUMAN Glucosidase 2 subunit beta OS=Homo sapiens GN=PRKCSH PE=4 SV=1;>sp|P14314|GLU2B_HUMAN Glucosidase 2 subunit beta OS=Homo sapiens GN=PRKCSH PE=1 SV=2;>tr|A2VCQ4|A2VCQ4_HUMAN PRKCSH protein (Fragment) OS=Homo sapiens GN=PRKCSH PE=2 SV=1	>tr|B4DJQ5|B4DJQ5_HUMAN cDNA FLJ59211, highly similar to Glucosidase 2 subunit beta OS=Homo sapiens PE=2 SV=1;>tr|K7ELL7|K7ELL7_HUMAN Glucosidase 2 subunit beta OS=Homo sapiens GN=PRKCSH PE=4 SV=1;>sp|P14314|GLU2B_HUMAN Glucosidase 2 subunit beta OS=Homo s	4	2	2	4.5	60.134	1581900	1315200	2862900	1005200	807690	1360600	34491000	30301000	35086000	51398000	43519000	69925000
>sp|P14550|AK1A1_HUMAN Alcohol dehydrogenase [NADP(+)] OS=Homo sapiens GN=AKR1A1 PE=1 SV=3;>tr|Q5T621|Q5T621_HUMAN Alcohol dehydrogenase [NADP(+)] (Fragment) OS=Homo sapiens GN=AKR1A1 PE=2 SV=1	>sp|P14550|AK1A1_HUMAN Alcohol dehydrogenase [NADP(+)] OS=Homo sapiens GN=AKR1A1 PE=1 SV=3;>tr|Q5T621|Q5T621_HUMAN Alcohol dehydrogenase [NADP(+)] (Fragment) OS=Homo sapiens GN=AKR1A1 PE=2 SV=1	>sp|P14550|AK1A1_HUMAN Alcohol dehydrogenase [NADP(+)] OS=Homo sapiens GN=AKR1A1 PE=1 SV=3;>tr|Q5T621|Q5T621_HUMAN Alcohol dehydrogenase [NADP(+)] (Fragment) OS=Homo sapiens GN=AKR1A1 PE=2 SV=1	2	2	2	8	36.573	3740100	4122900	4612200	548510	761770	610080	86891000	101220000	83816000	26173000	36276000	28798000
>sp|P14555|PA2GA_HUMAN Phospholipase A2, membrane associated OS=Homo sapiens GN=PLA2G2A PE=1 SV=2;>tr|Q6DN23|Q6DN23_HUMAN Platelet phospholipase A2 OS=Homo sapiens PE=2 SV=1;>tr|Q96RW9|Q96RW9_HUMAN Mutant synovial phospholipase A2 (Fragment) OS=Homo sapiens GN=PLA2 PE=2 SV=1;>tr|Q96RW8|Q96RW8_HUMAN Mutant synovial phospholipase A2 (Fragment) OS=Homo sapiens GN=PLA2 PE=2 SV=1;>tr|Q9C011|Q9C011_HUM…	>sp|P14555|PA2GA_HUMAN Phospholipase A2, membrane associated OS=Homo sapiens GN=PLA2G2A PE=1 SV=2;>tr|Q6DN23|Q6DN23_HUMAN Platelet phospholipase A2 OS=Homo sapiens PE=2 SV=1;>tr|Q96RW9|Q96RW9_HUMAN Mutant synovial phospholipase A2 (Fragment) OS=Homo sapiens GN=PLA2 PE=2 SV=1	>sp|P14555|PA2GA_HUMAN Phospholipase A2, membrane associated OS=Homo sapiens GN=PLA2G2A PE=1 SV=2;>tr|Q6DN23|Q6DN23_HUMAN Platelet phospholipase A2 OS=Homo sapiens PE=2 SV=1;>tr|Q96RW9|Q96RW9_HUMAN Mutant synovial phospholipase A2 (Fragment) OS=Homo sapien	5	7	6	41	16.083	305530000	294540000	343280000	493110000	491750000	541710000	2733400000	2047500000	2210000000	8214300000	8034800000	9012700000
>sp|P14618|KPYM_HUMAN Pyruvate kinase isozymes M1/M2 OS=Homo sapiens GN=PKM PE=1 SV=4;>tr|H3BTN5|H3BTN5_HUMAN Pyruvate kinase (Fragment) OS=Homo sapiens GN=PKM PE=3 SV=1;>tr|B4DRT3|B4DRT3_HUMAN Pyruvate kinase OS=Homo sapiens PE=2 SV=1;>tr|B4DNK4|B4DNK4_HUMAN Pyruvate kinase OS=Homo sapiens PE=2 SV=1;>tr|H3BQ34|H3BQ34_HUMAN Pyruvate kinase OS=Homo sapiens GN=PKM PE=3 SV=1;>tr|H3BTJ2|H3BTJ2_HUMAN …	>sp|P14618|KPYM_HUMAN Pyruvate kinase isozymes M1/M2 OS=Homo sapiens GN=PKM PE=1 SV=4;>tr|H3BTN5|H3BTN5_HUMAN Pyruvate kinase (Fragment) OS=Homo sapiens GN=PKM PE=3 SV=1;>tr|B4DRT3|B4DRT3_HUMAN Pyruvate kinase OS=Homo sapiens PE=2 SV=1;>tr|B4DNK4|B4DNK4_HUMAN Pyruvate kinase OS=Homo sapiens PE=2 SV=1;>tr|H3BQ34|H3BQ34_HUMAN Pyruvate kinase OS=Homo sapiens GN=PKM PE=3 SV=1;>tr|H3BTJ2|H3BTJ2_HUMAN …	>sp|P14618|KPYM_HUMAN Pyruvate kinase isozymes M1/M2 OS=Homo sapiens GN=PKM PE=1 SV=4;>tr|H3BTN5|H3BTN5_HUMAN Pyruvate kinase (Fragment) OS=Homo sapiens GN=PKM PE=3 SV=1;>tr|B4DRT3|B4DRT3_HUMAN Pyruvate kinase OS=Homo sapiens PE=2 SV=1;>tr|B4DNK4|B4DNK4_HU	23	13	13	34.7	57.936	28557000	30203000	29632000	1355600	1849500	1747700	1054800000	1043900000	885150000	131930000	213760000	183200000
>sp|P14866|HNRPL_HUMAN Heterogeneous nuclear ribonucleoprotein L OS=Homo sapiens GN=HNRNPL PE=1 SV=2;>tr|Q6NTA2|Q6NTA2_HUMAN HNRNPL protein (Fragment) OS=Homo sapiens GN=HNRNPL PE=2 SV=2;>tr|B2R959|B2R959_HUMAN cDNA, FLJ94229, highly similar to Homo sapiens heterogeneous nuclear ribonucleoprotein L (HNRPL),mRNA OS=Homo sapiens PE=2 SV=1;>tr|B4DPK8|B4DPK8_HUMAN cDNA FLJ55127, highly similar to Het…	>sp|P14866|HNRPL_HUMAN Heterogeneous nuclear ribonucleoprotein L OS=Homo sapiens GN=HNRNPL PE=1 SV=2;>tr|Q6NTA2|Q6NTA2_HUMAN HNRNPL protein (Fragment) OS=Homo sapiens GN=HNRNPL PE=2 SV=2;>tr|B2R959|B2R959_HUMAN cDNA, FLJ94229, highly similar to Homo sapiens heterogeneous nuclear ribonucleoprotein L (HNRPL),mRNA OS=Homo sapiens PE=2 SV=1;>tr|B4DPK8|B4DPK8_HUMAN cDNA FLJ55127, highly similar to Het…	>sp|P14866|HNRPL_HUMAN Heterogeneous nuclear ribonucleoprotein L OS=Homo sapiens GN=HNRNPL PE=1 SV=2;>tr|Q6NTA2|Q6NTA2_HUMAN HNRNPL protein (Fragment) OS=Homo sapiens GN=HNRNPL PE=2 SV=2;>tr|B2R959|B2R959_HUMAN cDNA, FLJ94229, highly similar to Homo sapien	5	1	1	1.9	64.132	1033400	1538700	1488400	0	0	0	20668000	32520000	27906000	0	0	0
>sp|P18669|PGAM1_HUMAN Phosphoglycerate mutase 1 OS=Homo sapiens GN=PGAM1 PE=1 SV=2;>tr|Q0D2Q6|Q0D2Q6_HUMAN Phosphoglycerate mutase 1 (Brain) OS=Homo sapiens GN=PGAM1 PE=2 SV=1;>tr|Q53G35|Q53G35_HUMAN Phosphoglycerate mutase (Fragment) OS=Homo sapiens PE=2 SV=1;>tr|Q6FHK8|Q6FHK8_HUMAN PGAM1 protein OS=Homo sapiens GN=PGAM1 PE=2 SV=1;>tr|Q6FHU2|Q6FHU2_HUMAN HCG2015269, isoform CRA_a (Fragment) OS=…	>sp|P18669|PGAM1_HUMAN Phosphoglycerate mutase 1 OS=Homo sapiens GN=PGAM1 PE=1 SV=2;>tr|Q0D2Q6|Q0D2Q6_HUMAN Phosphoglycerate mutase 1 (Brain) OS=Homo sapiens GN=PGAM1 PE=2 SV=1;>tr|Q53G35|Q53G35_HUMAN Phosphoglycerate mutase (Fragment) OS=Homo sapiens PE=2 SV=1;>tr|Q6FHK8|Q6FHK8_HUMAN PGAM1 protein OS=Homo sapiens GN=PGAM1 PE=2 SV=1;>tr|Q6FHU2|Q6FHU2_HUMAN HCG2015269, isoform CRA_a (Fragment) OS=…	>sp|P18669|PGAM1_HUMAN Phosphoglycerate mutase 1 OS=Homo sapiens GN=PGAM1 PE=1 SV=2;>tr|Q0D2Q6|Q0D2Q6_HUMAN Phosphoglycerate mutase 1 (Brain) OS=Homo sapiens GN=PGAM1 PE=2 SV=1;>tr|Q53G35|Q53G35_HUMAN Phosphoglycerate mutase (Fragment) OS=Homo sapiens PE=2	14	2	2	7.9	28.804	5491100	5537800	8557400	0	0	0	76400000	81420000	80131000	0	0	0
>sp|P15311|EZRI_HUMAN Ezrin OS=Homo sapiens GN=EZR PE=1 SV=4;>tr|Q6NUR7|Q6NUR7_HUMAN Ezrin OS=Homo sapiens GN=EZR PE=2 SV=1;>tr|B7Z5V2|B7Z5V2_HUMAN cDNA FLJ54141, highly similar to Ezrin OS=Homo sapiens PE=2 SV=1;>tr|E7EQR4|E7EQR4_HUMAN Ezrin OS=Homo sapiens GN=EZR PE=4 SV=2;>tr|B2R6J2|B2R6J2_HUMAN cDNA, FLJ92973, highly similar to Homo sapiens villin 2 (ezrin) (VIL2), mRNA OS=Homo sapiens PE=2 S…	>sp|P15311|EZRI_HUMAN Ezrin OS=Homo sapiens GN=EZR PE=1 SV=4;>tr|Q6NUR7|Q6NUR7_HUMAN Ezrin OS=Homo sapiens GN=EZR PE=2 SV=1;>tr|B7Z5V2|B7Z5V2_HUMAN cDNA FLJ54141, highly similar to Ezrin OS=Homo sapiens PE=2 SV=1;>tr|E7EQR4|E7EQR4_HUMAN Ezrin OS=Homo sapiens GN=EZR PE=4 SV=2;>tr|B2R6J2|B2R6J2_HUMAN cDNA, FLJ92973, highly similar to Homo sapiens villin 2 (ezrin) (VIL2), mRNA OS=Homo sapiens PE=2 S…	>sp|P15311|EZRI_HUMAN Ezrin OS=Homo sapiens GN=EZR PE=1 SV=4;>tr|Q6NUR7|Q6NUR7_HUMAN Ezrin OS=Homo sapiens GN=EZR PE=2 SV=1;>tr|B7Z5V2|B7Z5V2_HUMAN cDNA FLJ54141, highly similar to Ezrin OS=Homo sapiens PE=2 SV=1;>tr|E7EQR4|E7EQR4_HUMAN Ezrin OS=Homo sapie	23	6	5	9.9	69.412	2966700	3048600	5850100	346880	31363	691030	71710000	57903000	98024000	40579000	18014000	49263000
>sp|P17066|HSP76_HUMAN Heat shock 70 kDa protein 6 OS=Homo sapiens GN=HSPA6 PE=1 SV=2;>tr|B2R6X5|B2R6X5_HUMAN cDNA, FLJ93166, highly similar to Homo sapiens heat shock 70kDa protein 6 (HSP70B') (HSPA6), mRNA OS=Homo sapiens PE=2 SV=1;>tr|B3KSM6|B3KSM6_HUMAN cDNA FLJ36606 fis, clone TRACH2015654, highly similar to HEAT SHOCK 70 kDa PROTEIN 6 OS=Homo sapiens PE=2 SV=1;>tr|Q53FC7|Q53FC7_HUMAN Heat s…	>sp|P17066|HSP76_HUMAN Heat shock 70 kDa protein 6 OS=Homo sapiens GN=HSPA6 PE=1 SV=2;>tr|B2R6X5|B2R6X5_HUMAN cDNA, FLJ93166, highly similar to Homo sapiens heat shock 70kDa protein 6 (HSP70B') (HSPA6), mRNA OS=Homo sapiens PE=2 SV=1;>tr|B3KSM6|B3KSM6_HUMAN cDNA FLJ36606 fis, clone TRACH2015654, highly similar to HEAT SHOCK 70 kDa PROTEIN 6 OS=Homo sapiens PE=2 SV=1;>tr|Q53FC7|Q53FC7_HUMAN Heat s…	>sp|P17066|HSP76_HUMAN Heat shock 70 kDa protein 6 OS=Homo sapiens GN=HSPA6 PE=1 SV=2;>tr|B2R6X5|B2R6X5_HUMAN cDNA, FLJ93166, highly similar to Homo sapiens heat shock 70kDa protein 6 (HSP70B) (HSPA6), mRNA OS=Homo sapiens PE=2 SV=1;>tr|B3KSM6|B3KSM6_HUMA	5	4	1	7.3	71.027	3175900	3087800	3432600	593750	463720	504840	120700000	124010000	122300000	44170000	37379000	38606000
>tr|Q59FR8|Q59FR8_HUMAN LGALS3 protein variant (Fragment) OS=Homo sapiens PE=2 SV=1;>sp|P17931|LEG3_HUMAN Galectin-3 OS=Homo sapiens GN=LGALS3 PE=1 SV=5;>tr|Q6FGL0|Q6FGL0_HUMAN LGALS3 protein (Fragment) OS=Homo sapiens GN=LGALS3 PE=2 SV=1;>tr|Q6NVH9|Q6NVH9_HUMAN Lectin, galactoside-binding, soluble, 3 OS=Homo sapiens GN=LGALS3 PE=2 SV=1;>tr|Q86TY5|Q86TY5_HUMAN Full-length cDNA clone CS0DI041YE05 …	>tr|Q59FR8|Q59FR8_HUMAN LGALS3 protein variant (Fragment) OS=Homo sapiens PE=2 SV=1;>sp|P17931|LEG3_HUMAN Galectin-3 OS=Homo sapiens GN=LGALS3 PE=1 SV=5;>tr|Q6FGL0|Q6FGL0_HUMAN LGALS3 protein (Fragment) OS=Homo sapiens GN=LGALS3 PE=2 SV=1;>tr|Q6NVH9|Q6NVH9_HUMAN Lectin, galactoside-binding, soluble, 3 OS=Homo sapiens GN=LGALS3 PE=2 SV=1;>tr|Q86TY5|Q86TY5_HUMAN Full-length cDNA clone CS0DI041YE05 …	>tr|Q59FR8|Q59FR8_HUMAN LGALS3 protein variant (Fragment) OS=Homo sapiens PE=2 SV=1;>sp|P17931|LEG3_HUMAN Galectin-3 OS=Homo sapiens GN=LGALS3 PE=1 SV=5;>tr|Q6FGL0|Q6FGL0_HUMAN LGALS3 protein (Fragment) OS=Homo sapiens GN=LGALS3 PE=2 SV=1;>tr|Q6NVH9|Q6NVH9	5	1	1	5.4	27.117	8302800	8674200	11711000	2862400	2211000	1531500	76494000	84448000	101150000	54119000	45369000	31802000
>sp|P19652|A1AG2_HUMAN Alpha-1-acid glycoprotein 2 OS=Homo sapiens GN=ORM2 PE=1 SV=2	>sp|P19652|A1AG2_HUMAN Alpha-1-acid glycoprotein 2 OS=Homo sapiens GN=ORM2 PE=1 SV=2	>sp|P19652|A1AG2_HUMAN Alpha-1-acid glycoprotein 2 OS=Homo sapiens GN=ORM2 PE=1 SV=2	1	4	2	23.9	23.602	19192000	20381000	24682000	2461800	2262300	2160800	256830000	219910000	234970000	59033000	57431000	53021000
>tr|D3DRR6|D3DRR6_HUMAN Inter-alpha (Globulin) inhibitor H2, isoform CRA_a OS=Homo sapiens GN=ITIH2 PE=4 SV=1;>sp|P19823|ITIH2_HUMAN Inter-alpha-trypsin inhibitor heavy chain H2 OS=Homo sapiens GN=ITIH2 PE=1 SV=2;>tr|A2RTY6|A2RTY6_HUMAN Inter-alpha (Globulin) inhibitor H2 OS=Homo sapiens GN=ITIH2 PE=2 SV=1;>tr|Q5T985|Q5T985_HUMAN Inter-alpha (Globulin) inhibitor H2 OS=Homo sapiens GN=ITIH2 PE=2 S…	>tr|D3DRR6|D3DRR6_HUMAN Inter-alpha (Globulin) inhibitor H2, isoform CRA_a OS=Homo sapiens GN=ITIH2 PE=4 SV=1;>sp|P19823|ITIH2_HUMAN Inter-alpha-trypsin inhibitor heavy chain H2 OS=Homo sapiens GN=ITIH2 PE=1 SV=2;>tr|A2RTY6|A2RTY6_HUMAN Inter-alpha (Globulin) inhibitor H2 OS=Homo sapiens GN=ITIH2 PE=2 SV=1;>tr|Q5T985|Q5T985_HUMAN Inter-alpha (Globulin) inhibitor H2 OS=Homo sapiens GN=ITIH2 PE=2 S…	>tr|D3DRR6|D3DRR6_HUMAN Inter-alpha (Globulin) inhibitor H2, isoform CRA_a OS=Homo sapiens GN=ITIH2 PE=4 SV=1;>sp|P19823|ITIH2_HUMAN Inter-alpha-trypsin inhibitor heavy chain H2 OS=Homo sapiens GN=ITIH2 PE=1 SV=2;>tr|A2RTY6|A2RTY6_HUMAN Inter-alpha (Globul	7	11	11	12.4	106.57	20230000	21286000	26009000	530750	205780	519160	995500000	1105400000	1094800000	64194000	35348000	59556000
>sp|P19827|ITIH1_HUMAN Inter-alpha-trypsin inhibitor heavy chain H1 OS=Homo sapiens GN=ITIH1 PE=1 SV=3;>tr|B7Z549|B7Z549_HUMAN cDNA FLJ56821, highly similar to Inter-alpha-trypsin inhibitor heavy chain H1 OS=Homo sapiens PE=2 SV=1;>tr|B7Z539|B7Z539_HUMAN cDNA FLJ56954, highly similar to Inter-alpha-trypsin inhibitor heavy chain H1 OS=Homo sapiens PE=2 SV=1;>tr|F5H7E1|F5H7E1_HUMAN Inter-alpha-tryp…	>sp|P19827|ITIH1_HUMAN Inter-alpha-trypsin inhibitor heavy chain H1 OS=Homo sapiens GN=ITIH1 PE=1 SV=3;>tr|B7Z549|B7Z549_HUMAN cDNA FLJ56821, highly similar to Inter-alpha-trypsin inhibitor heavy chain H1 OS=Homo sapiens PE=2 SV=1;>tr|B7Z539|B7Z539_HUMAN cDNA FLJ56954, highly similar to Inter-alpha-trypsin inhibitor heavy chain H1 OS=Homo sapiens PE=2 SV=1;>tr|F5H7E1|F5H7E1_HUMAN Inter-alpha-tryp…	>sp|P19827|ITIH1_HUMAN Inter-alpha-trypsin inhibitor heavy chain H1 OS=Homo sapiens GN=ITIH1 PE=1 SV=3;>tr|B7Z549|B7Z549_HUMAN cDNA FLJ56821, highly similar to Inter-alpha-trypsin inhibitor heavy chain H1 OS=Homo sapiens PE=2 SV=1;>tr|B7Z539|B7Z539_HUMAN c	13	8	8	11.3	101.39	9086200	11077000	17900000	290420	306670	342120	535400000	510980000	512600000	50636000	55494000	58528000
>tr|H9KVA0|H9KVA0_HUMAN Thymidine phosphorylase OS=Homo sapiens GN=TYMP PE=4 SV=1;>sp|P19971|TYPH_HUMAN Thymidine phosphorylase OS=Homo sapiens GN=TYMP PE=1 SV=2;>tr|B2RBL3|B2RBL3_HUMAN cDNA, FLJ95575, highly similar to Homo sapiens endothelial cell growth factor 1 (platelet-derived) (ECGF1), mRNA OS=Homo sapiens PE=2 SV=1;>tr|E5KRG5|E5KRG5_HUMAN HCG1988078, isoform CRA_a OS=Homo sapiens GN=hCG_1…	>tr|H9KVA0|H9KVA0_HUMAN Thymidine phosphorylase OS=Homo sapiens GN=TYMP PE=4 SV=1;>sp|P19971|TYPH_HUMAN Thymidine phosphorylase OS=Homo sapiens GN=TYMP PE=1 SV=2;>tr|B2RBL3|B2RBL3_HUMAN cDNA, FLJ95575, highly similar to Homo sapiens endothelial cell growth factor 1 (platelet-derived) (ECGF1), mRNA OS=Homo sapiens PE=2 SV=1;>tr|E5KRG5|E5KRG5_HUMAN HCG1988078, isoform CRA_a OS=Homo sapiens GN=hCG_1…	>tr|H9KVA0|H9KVA0_HUMAN Thymidine phosphorylase OS=Homo sapiens GN=TYMP PE=4 SV=1;>sp|P19971|TYPH_HUMAN Thymidine phosphorylase OS=Homo sapiens GN=TYMP PE=1 SV=2;>tr|B2RBL3|B2RBL3_HUMAN cDNA, FLJ95575, highly similar to Homo sapiens endothelial cell growth	5	2	2	4.7	50.404	1270200	0	1289300	0	0	0	0	0	29008000	0	0	0
>sp|P20061|TCO1_HUMAN Transcobalamin-1 OS=Homo sapiens GN=TCN1 PE=1 SV=2	>sp|P20061|TCO1_HUMAN Transcobalamin-1 OS=Homo sapiens GN=TCN1 PE=1 SV=2	>sp|P20061|TCO1_HUMAN Transcobalamin-1 OS=Homo sapiens GN=TCN1 PE=1 SV=2	1	8	8	24.5	48.206	34926000	45100000	43191000	76984000	65405000	66074000	794840000	723330000	645460000	2988500000	1966400000	2080100000
>sp|P20962|PTMS_HUMAN Parathymosin OS=Homo sapiens GN=PTMS PE=1 SV=2;>tr|A2VCM6|A2VCM6_HUMAN PTMS protein (Fragment) OS=Homo sapiens GN=PTMS PE=2 SV=1;>tr|O15256|O15256_HUMAN Parathymosin (Fragment) OS=Homo sapiens GN=PTMS PE=2 SV=1	>sp|P20962|PTMS_HUMAN Parathymosin OS=Homo sapiens GN=PTMS PE=1 SV=2;>tr|A2VCM6|A2VCM6_HUMAN PTMS protein (Fragment) OS=Homo sapiens GN=PTMS PE=2 SV=1;>tr|O15256|O15256_HUMAN Parathymosin (Fragment) OS=Homo sapiens GN=PTMS PE=2 SV=1	>sp|P20962|PTMS_HUMAN Parathymosin OS=Homo sapiens GN=PTMS PE=1 SV=2;>tr|A2VCM6|A2VCM6_HUMAN PTMS protein (Fragment) OS=Homo sapiens GN=PTMS PE=2 SV=1;>tr|O15256|O15256_HUMAN Parathymosin (Fragment) OS=Homo sapiens GN=PTMS PE=2 SV=1	3	1	1	11.8	11.53	8939200	7551800	9611700	367620	379780	605670	27392000	24453000	27610000	1866600	2007600	2876200
>sp|P21291|CSRP1_HUMAN Cysteine and glycine-rich protein 1 OS=Homo sapiens GN=CSRP1 PE=1 SV=3;>tr|A8K268|A8K268_HUMAN cDNA FLJ77815, highly similar to Homo sapiens cysteine and glycine-rich protein 1 (CSRP1), mRNA OS=Homo sapiens PE=2 SV=1;>tr|Q5U0J2|Q5U0J2_HUMAN Cysteine and glycine-rich protein 1 OS=Homo sapiens GN=CSRP1 PE=2 SV=1;>tr|Q6ZMS3|Q6ZMS3_HUMAN cDNA FLJ16726 fis, clone UTERU3014791 OS…	>sp|P21291|CSRP1_HUMAN Cysteine and glycine-rich protein 1 OS=Homo sapiens GN=CSRP1 PE=1 SV=3;>tr|A8K268|A8K268_HUMAN cDNA FLJ77815, highly similar to Homo sapiens cysteine and glycine-rich protein 1 (CSRP1), mRNA OS=Homo sapiens PE=2 SV=1;>tr|Q5U0J2|Q5U0J2_HUMAN Cysteine and glycine-rich protein 1 OS=Homo sapiens GN=CSRP1 PE=2 SV=1;>tr|Q6ZMS3|Q6ZMS3_HUMAN cDNA FLJ16726 fis, clone UTERU3014791 OS…	>sp|P21291|CSRP1_HUMAN Cysteine and glycine-rich protein 1 OS=Homo sapiens GN=CSRP1 PE=1 SV=3;>tr|A8K268|A8K268_HUMAN cDNA FLJ77815, highly similar to Homo sapiens cysteine and glycine-rich protein 1 (CSRP1), mRNA OS=Homo sapiens PE=2 SV=1;>tr|Q5U0J2|Q5U0J	11	1	1	8.8	20.567	1121900	1358200	1266700	117870	120260	155830	13815000	17674000	14623000	2628500	2797000	3353900
>sp|P21980|TGM2_HUMAN Protein-glutamine gamma-glutamyltransferase 2 OS=Homo sapiens GN=TGM2 PE=1 SV=2;>tr|B4DTN7|B4DTN7_HUMAN cDNA FLJ57198, highly similar to Protein-glutamine gamma-glutamyltransferase 2 (EC 2.3.2.13) OS=Homo sapiens PE=2 SV=1;>tr|F5H6P0|F5H6P0_HUMAN Protein-glutamine gamma-glutamyltransferase 2 OS=Homo sapiens GN=TGM2 PE=3 SV=1;>tr|B4DIT7|B4DIT7_HUMAN Protein-glutamine gamma-gl…	>sp|P21980|TGM2_HUMAN Protein-glutamine gamma-glutamyltransferase 2 OS=Homo sapiens GN=TGM2 PE=1 SV=2;>tr|B4DTN7|B4DTN7_HUMAN cDNA FLJ57198, highly similar to Protein-glutamine gamma-glutamyltransferase 2 (EC 2.3.2.13) OS=Homo sapiens PE=2 SV=1;>tr|F5H6P0|F5H6P0_HUMAN Protein-glutamine gamma-glutamyltransferase 2 OS=Homo sapiens GN=TGM2 PE=3 SV=1;>tr|B4DIT7|B4DIT7_HUMAN Protein-glutamine gamma-gl…	>sp|P21980|TGM2_HUMAN Protein-glutamine gamma-glutamyltransferase 2 OS=Homo sapiens GN=TGM2 PE=1 SV=2;>tr|B4DTN7|B4DTN7_HUMAN cDNA FLJ57198, highly similar to Protein-glutamine gamma-glutamyltransferase 2 (EC 2.3.2.13) OS=Homo sapiens PE=2 SV=1;>tr|F5H6P0|	11	6	6	8.4	77.328	7680100	5397400	7594500	620410	818190	888080	194740000	192110000	206050000	120570000	79951000	90028000
>sp|P22079|PERL_HUMAN Lactoperoxidase OS=Homo sapiens GN=LPO PE=1 SV=2;>tr|F5H386|F5H386_HUMAN Lactoperoxidase OS=Homo sapiens GN=LPO PE=4 SV=1;>tr|B4E1M1|B4E1M1_HUMAN cDNA FLJ60391, highly similar to Lactoperoxidase (EC 1.11.1.7) OS=Homo sapiens PE=2 SV=1;>tr|Q9H3M1|Q9H3M1_HUMAN Airway lactoperoxidase (Fragment) OS=Homo sapiens PE=2 SV=1;>tr|H0Y3I2|H0Y3I2_HUMAN Lactoperoxidase (Fragment) OS=Homo…	>sp|P22079|PERL_HUMAN Lactoperoxidase OS=Homo sapiens GN=LPO PE=1 SV=2;>tr|F5H386|F5H386_HUMAN Lactoperoxidase OS=Homo sapiens GN=LPO PE=4 SV=1;>tr|B4E1M1|B4E1M1_HUMAN cDNA FLJ60391, highly similar to Lactoperoxidase (EC 1.11.1.7) OS=Homo sapiens PE=2 SV=1	>sp|P22079|PERL_HUMAN Lactoperoxidase OS=Homo sapiens GN=LPO PE=1 SV=2;>tr|F5H386|F5H386_HUMAN Lactoperoxidase OS=Homo sapiens GN=LPO PE=4 SV=1;>tr|B4E1M1|B4E1M1_HUMAN cDNA FLJ60391, highly similar to Lactoperoxidase (EC 1.11.1.7) OS=Homo sapiens PE=2 SV=1	9	15	15	28.4	80.287	16670000	20575000	23302000	51051000	43354000	34358000	815760000	767250000	787720000	4145100000	4206300000	3711300000
>tr|Q32Q12|Q32Q12_HUMAN Nucleoside diphosphate kinase OS=Homo sapiens GN=NME1-NME2 PE=2 SV=1;>sp|P22392|NDKB_HUMAN Nucleoside diphosphate kinase B OS=Homo sapiens GN=NME2 PE=1 SV=1;>tr|Q6FHN3|Q6FHN3_HUMAN Nucleoside diphosphate kinase OS=Homo sapiens GN=NME2 PE=2 SV=1;>tr|J3KPD9|J3KPD9_HUMAN Nucleoside diphosphate kinase B OS=Homo sapiens GN=NME2 PE=3 SV=1;>sp|P15531|NDKA_HUMAN Nucleoside diphosp…	>tr|Q32Q12|Q32Q12_HUMAN Nucleoside diphosphate kinase OS=Homo sapiens GN=NME1-NME2 PE=2 SV=1;>sp|P22392|NDKB_HUMAN Nucleoside diphosphate kinase B OS=Homo sapiens GN=NME2 PE=1 SV=1;>tr|Q6FHN3|Q6FHN3_HUMAN Nucleoside diphosphate kinase OS=Homo sapiens GN=NME2 PE=2 SV=1;>tr|J3KPD9|J3KPD9_HUMAN Nucleoside diphosphate kinase B OS=Homo sapiens GN=NME2 PE=3 SV=1;>sp|P15531|NDKA_HUMAN Nucleoside diphosp…	>tr|Q32Q12|Q32Q12_HUMAN Nucleoside diphosphate kinase OS=Homo sapiens GN=NME1-NME2 PE=2 SV=1;>sp|P22392|NDKB_HUMAN Nucleoside diphosphate kinase B OS=Homo sapiens GN=NME2 PE=1 SV=1;>tr|Q6FHN3|Q6FHN3_HUMAN Nucleoside diphosphate kinase OS=Homo sapiens GN=NM	10	3	3	23.3	32.642	2461800	5141000	9098700	0	459300	826640	75571000	81106000	103600000	0	43276000	62045000
>sp|P22626|ROA2_HUMAN Heterogeneous nuclear ribonucleoproteins A2/B1 OS=Homo sapiens GN=HNRNPA2B1 PE=1 SV=2;>tr|I6L957|I6L957_HUMAN HNRNPA2B1 protein OS=Homo sapiens GN=HNRNPA2B1 PE=2 SV=1	>sp|P22626|ROA2_HUMAN Heterogeneous nuclear ribonucleoproteins A2/B1 OS=Homo sapiens GN=HNRNPA2B1 PE=1 SV=2;>tr|I6L957|I6L957_HUMAN HNRNPA2B1 protein OS=Homo sapiens GN=HNRNPA2B1 PE=2 SV=1	>sp|P22626|ROA2_HUMAN Heterogeneous nuclear ribonucleoproteins A2/B1 OS=Homo sapiens GN=HNRNPA2B1 PE=1 SV=2;>tr|I6L957|I6L957_HUMAN HNRNPA2B1 protein OS=Homo sapiens GN=HNRNPA2B1 PE=2 SV=1	2	3	3	8.8	37.429	9501800	7487700	10323000	500460	98792	164240	170500000	154870000	174550000	18898000	5821100	8225800
>sp|P23083|HV103_HUMAN Ig heavy chain V-I region V35 OS=Homo sapiens PE=1 SV=1;>tr|Q9UL89|Q9UL89_HUMAN Myosin-reactive immunoglobulin heavy chain variable region (Fragment) OS=Homo sapiens PE=2 SV=1	>sp|P23083|HV103_HUMAN Ig heavy chain V-I region V35 OS=Homo sapiens PE=1 SV=1;>tr|Q9UL89|Q9UL89_HUMAN Myosin-reactive immunoglobulin heavy chain variable region (Fragment) OS=Homo sapiens PE=2 SV=1	>sp|P23083|HV103_HUMAN Ig heavy chain V-I region V35 OS=Homo sapiens PE=1 SV=1;>tr|Q9UL89|Q9UL89_HUMAN Myosin-reactive immunoglobulin heavy chain variable region (Fragment) OS=Homo sapiens PE=2 SV=1	2	2	1	16.2	13.009	16772000	17147000	17349000	4669900	3786900	3753600	102550000	110780000	99438000	60889000	53214000	50716000
>tr|E9PK25|E9PK25_HUMAN Cofilin-1 OS=Homo sapiens GN=CFL1 PE=4 SV=1;>sp|P23528|COF1_HUMAN Cofilin-1 OS=Homo sapiens GN=CFL1 PE=1 SV=3;>tr|E9PP50|E9PP50_HUMAN Cofilin-1 (Fragment) OS=Homo sapiens GN=CFL1 PE=4 SV=1;>tr|B4E112|B4E112_HUMAN cDNA FLJ51435, moderately similar to Cofilin-1 OS=Homo sapiens PE=4 SV=1;>tr|E9PS23|E9PS23_HUMAN Cofilin-1 (Fragment) OS=Homo sapiens GN=CFL1 PE=4 SV=1;>tr|G3V1A4…	>tr|E9PK25|E9PK25_HUMAN Cofilin-1 OS=Homo sapiens GN=CFL1 PE=4 SV=1;>sp|P23528|COF1_HUMAN Cofilin-1 OS=Homo sapiens GN=CFL1 PE=1 SV=3;>tr|E9PP50|E9PP50_HUMAN Cofilin-1 (Fragment) OS=Homo sapiens GN=CFL1 PE=4 SV=1;>tr|B4E112|B4E112_HUMAN cDNA FLJ51435, moderately similar to Cofilin-1 OS=Homo sapiens PE=4 SV=1;>tr|E9PS23|E9PS23_HUMAN Cofilin-1 (Fragment) OS=Homo sapiens GN=CFL1 PE=4 SV=1;>tr|G3V1A4…	>tr|E9PK25|E9PK25_HUMAN Cofilin-1 OS=Homo sapiens GN=CFL1 PE=4 SV=1;>sp|P23528|COF1_HUMAN Cofilin-1 OS=Homo sapiens GN=CFL1 PE=1 SV=3;>tr|E9PP50|E9PP50_HUMAN Cofilin-1 (Fragment) OS=Homo sapiens GN=CFL1 PE=4 SV=1;>tr|B4E112|B4E112_HUMAN cDNA FLJ51435, mode	8	4	4	23.5	22.728	8795700	25097000	21348000	1075700	1644200	1174200	168200000	263920000	266920000	59129000	57464000	64019000
>tr|B4DRM3|B4DRM3_HUMAN cDNA FLJ54492, highly similar to Eukaryotic translation initiation factor 4B OS=Homo sapiens PE=2 SV=1;>tr|E7EX17|E7EX17_HUMAN Eukaryotic translation initiation factor 4B OS=Homo sapiens GN=EIF4B PE=4 SV=1;>sp|P23588|IF4B_HUMAN Eukaryotic translation initiation factor 4B OS=Homo sapiens GN=EIF4B PE=1 SV=2;>tr|B4DEP6|B4DEP6_HUMAN cDNA FLJ59206, highly similar to Eukaryotic …	>tr|B4DRM3|B4DRM3_HUMAN cDNA FLJ54492, highly similar to Eukaryotic translation initiation factor 4B OS=Homo sapiens PE=2 SV=1;>tr|E7EX17|E7EX17_HUMAN Eukaryotic translation initiation factor 4B OS=Homo sapiens GN=EIF4B PE=4 SV=1;>sp|P23588|IF4B_HUMAN Eukaryotic translation initiation factor 4B OS=Homo sapiens GN=EIF4B PE=1 SV=2;>tr|B4DEP6|B4DEP6_HUMAN cDNA FLJ59206, highly similar to Eukaryotic …	>tr|B4DRM3|B4DRM3_HUMAN cDNA FLJ54492, highly similar to Eukaryotic translation initiation factor 4B OS=Homo sapiens PE=2 SV=1;>tr|E7EX17|E7EX17_HUMAN Eukaryotic translation initiation factor 4B OS=Homo sapiens GN=EIF4B PE=4 SV=1;>sp|P23588|IF4B_HUMAN Euka	7	2	2	5.4	69.725	0	106720	173360	0	0	0	0	2026200	2903100	0	0	0
>sp|P25311|ZA2G_HUMAN Zinc-alpha-2-glycoprotein OS=Homo sapiens GN=AZGP1 PE=1 SV=2;>tr|C9JEV0|C9JEV0_HUMAN Zinc-alpha-2-glycoprotein OS=Homo sapiens GN=AZGP1 PE=3 SV=1;>tr|A0JLQ0|A0JLQ0_HUMAN AZGP1 protein (Fragment) OS=Homo sapiens GN=AZGP1 PE=2 SV=1;>sp|A8MT79|ZAGL1_HUMAN Putative zinc-alpha-2-glycoprotein-like 1 OS=Homo sapiens PE=5 SV=2;>tr|H7BZJ8|H7BZJ8_HUMAN Zinc-alpha-2-glycoprotein (Fragm…	>sp|P25311|ZA2G_HUMAN Zinc-alpha-2-glycoprotein OS=Homo sapiens GN=AZGP1 PE=1 SV=2;>tr|C9JEV0|C9JEV0_HUMAN Zinc-alpha-2-glycoprotein OS=Homo sapiens GN=AZGP1 PE=3 SV=1;>tr|A0JLQ0|A0JLQ0_HUMAN AZGP1 protein (Fragment) OS=Homo sapiens GN=AZGP1 PE=2 SV=1	>sp|P25311|ZA2G_HUMAN Zinc-alpha-2-glycoprotein OS=Homo sapiens GN=AZGP1 PE=1 SV=2;>tr|C9JEV0|C9JEV0_HUMAN Zinc-alpha-2-glycoprotein OS=Homo sapiens GN=AZGP1 PE=3 SV=1;>tr|A0JLQ0|A0JLQ0_HUMAN AZGP1 protein (Fragment) OS=Homo sapiens GN=AZGP1 PE=2 SV=1	5	20	20	58.1	34.258	1761700000	1721700000	1878300000	2553100000	2281600000	2091900000	27842000000	28453000000	28410000000	110860000000	110160000000	100840000000
>sp|P25815|S100P_HUMAN Protein S100-P OS=Homo sapiens GN=S100P PE=1 SV=2	>sp|P25815|S100P_HUMAN Protein S100-P OS=Homo sapiens GN=S100P PE=1 SV=2	>sp|P25815|S100P_HUMAN Protein S100-P OS=Homo sapiens GN=S100P PE=1 SV=2	1	2	2	30.5	10.4	85583000	64462000	84938000	10823000	9470800	10412000	352720000	283300000	296760000	83373000	78137000	81164000
>sp|P26038|MOES_HUMAN Moesin OS=Homo sapiens GN=MSN PE=1 SV=3;>tr|B7Z4C7|B7Z4C7_HUMAN cDNA FLJ57321, moderately similar to Moesin OS=Homo sapiens PE=2 SV=1	>sp|P26038|MOES_HUMAN Moesin OS=Homo sapiens GN=MSN PE=1 SV=3	>sp|P26038|MOES_HUMAN Moesin OS=Homo sapiens GN=MSN PE=1 SV=3	2	3	2	4.5	67.819	0	615660	1900400	0	0	0	0	0	58789000	0	0	0
>sp|P26447|S10A4_HUMAN Protein S100-A4 OS=Homo sapiens GN=S100A4 PE=1 SV=1;>tr|Q5Q9Z3|Q5Q9Z3_HUMAN Leukemia multidrug resistance associated protein (Fragment) OS=Homo sapiens PE=2 SV=1	>sp|P26447|S10A4_HUMAN Protein S100-A4 OS=Homo sapiens GN=S100A4 PE=1 SV=1	>sp|P26447|S10A4_HUMAN Protein S100-A4 OS=Homo sapiens GN=S100A4 PE=1 SV=1	2	5	5	36.6	11.728	372940000	372660000	371490000	30855000	27427000	84590000	2151300000	2082800000	2074700000	469000000	512010000	691490000
>sp|P27169|PON1_HUMAN Serum paraoxonase/arylesterase 1 OS=Homo sapiens GN=PON1 PE=1 SV=3	>sp|P27169|PON1_HUMAN Serum paraoxonase/arylesterase 1 OS=Homo sapiens GN=PON1 PE=1 SV=3	>sp|P27169|PON1_HUMAN Serum paraoxonase/arylesterase 1 OS=Homo sapiens GN=PON1 PE=1 SV=3	1	1	1	6.8	39.731	1046600	1196800	1336500	0	0	0	15873000	19437000	19301000	0	0	0
>sp|P27348|1433T_HUMAN 14-3-3 protein theta OS=Homo sapiens GN=YWHAQ PE=1 SV=1;>tr|B4DMT8|B4DMT8_HUMAN cDNA FLJ52118, highly similar to 14-3-3 protein theta OS=Homo sapiens PE=2 SV=1;>tr|Q53S41|Q53S41_HUMAN Putative uncharacterized protein YWHAQ (Fragment) OS=Homo sapiens GN=YWHAQ PE=2 SV=1;>tr|B4DY04|B4DY04_HUMAN cDNA FLJ51144, highly similar to 14-3-3 protein theta OS=Homo sapiens PE=2 SV=1	>sp|P27348|1433T_HUMAN 14-3-3 protein theta OS=Homo sapiens GN=YWHAQ PE=1 SV=1;>tr|B4DMT8|B4DMT8_HUMAN cDNA FLJ52118, highly similar to 14-3-3 protein theta OS=Homo sapiens PE=2 SV=1;>tr|Q53S41|Q53S41_HUMAN Putative uncharacterized protein YWHAQ (Fragment) OS=Homo sapiens GN=YWHAQ PE=2 SV=1;>tr|B4DY04|B4DY04_HUMAN cDNA FLJ51144, highly similar to 14-3-3 protein theta OS=Homo sapiens PE=2 SV=1	>sp|P27348|1433T_HUMAN 14-3-3 protein theta OS=Homo sapiens GN=YWHAQ PE=1 SV=1;>tr|B4DMT8|B4DMT8_HUMAN cDNA FLJ52118, highly similar to 14-3-3 protein theta OS=Homo sapiens PE=2 SV=1;>tr|Q53S41|Q53S41_HUMAN Putative uncharacterized protein YWHAQ (Fragment)	4	5	1	18.8	27.764	1482800	1394400	1608100	0	0	0	21122000	20989000	21474000	0	0	0
>sp|P28325|CYTD_HUMAN Cystatin-D OS=Homo sapiens GN=CST5 PE=1 SV=1	>sp|P28325|CYTD_HUMAN Cystatin-D OS=Homo sapiens GN=CST5 PE=1 SV=1	>sp|P28325|CYTD_HUMAN Cystatin-D OS=Homo sapiens GN=CST5 PE=1 SV=1	1	3	3	31	16.08	23082000	23415000	36354000	31640000	31678000	31679000	198350000	142590000	226070000	584040000	554110000	531560000
>tr|Q5RHS7|Q5RHS7_HUMAN Protein S100-A2 OS=Homo sapiens GN=S100A2 PE=2 SV=1;>sp|P29034|S10A2_HUMAN Protein S100-A2 OS=Homo sapiens GN=S100A2 PE=1 SV=3	>tr|Q5RHS7|Q5RHS7_HUMAN Protein S100-A2 OS=Homo sapiens GN=S100A2 PE=2 SV=1;>sp|P29034|S10A2_HUMAN Protein S100-A2 OS=Homo sapiens GN=S100A2 PE=1 SV=3	>tr|Q5RHS7|Q5RHS7_HUMAN Protein S100-A2 OS=Homo sapiens GN=S100A2 PE=2 SV=1;>sp|P29034|S10A2_HUMAN Protein S100-A2 OS=Homo sapiens GN=S100A2 PE=1 SV=3	2	1	1	7.2	15.695	0	0	1647500	0	0	0	0	0	16949000	0	0	0
>tr|B4DE31|B4DE31_HUMAN cDNA FLJ54957, highly similar to Transketolase (EC 2.2.1.1) OS=Homo sapiens PE=2 SV=1;>tr|E7EPA7|E7EPA7_HUMAN Transketolase OS=Homo sapiens GN=TKT PE=4 SV=1;>sp|P29401|TKT_HUMAN Transketolase OS=Homo sapiens GN=TKT PE=1 SV=3;>tr|Q53EM5|Q53EM5_HUMAN Transketolase variant (Fragment) OS=Homo sapiens PE=2 SV=1;>tr|B4E022|B4E022_HUMAN Transketolase OS=Homo sapiens GN=TKT PE=2 S…	>tr|B4DE31|B4DE31_HUMAN cDNA FLJ54957, highly similar to Transketolase (EC 2.2.1.1) OS=Homo sapiens PE=2 SV=1;>tr|E7EPA7|E7EPA7_HUMAN Transketolase OS=Homo sapiens GN=TKT PE=4 SV=1;>sp|P29401|TKT_HUMAN Transketolase OS=Homo sapiens GN=TKT PE=1 SV=3;>tr|Q53EM5|Q53EM5_HUMAN Transketolase variant (Fragment) OS=Homo sapiens PE=2 SV=1;>tr|B4E022|B4E022_HUMAN Transketolase OS=Homo sapiens GN=TKT PE=2 S…	>tr|B4DE31|B4DE31_HUMAN cDNA FLJ54957, highly similar to Transketolase (EC 2.2.1.1) OS=Homo sapiens PE=2 SV=1;>tr|E7EPA7|E7EPA7_HUMAN Transketolase OS=Homo sapiens GN=TKT PE=4 SV=1;>sp|P29401|TKT_HUMAN Transketolase OS=Homo sapiens GN=TKT PE=1 SV=3;>tr|Q53	8	1	1	1.4	68.741	3365300	3314100	4128000	478670	0	480440	88688000	92292000	101980000	26683000	0	26881000
>sp|P30041|PRDX6_HUMAN Peroxiredoxin-6 OS=Homo sapiens GN=PRDX6 PE=1 SV=3;>tr|B4DUK1|B4DUK1_HUMAN cDNA FLJ51310, moderately similar to Peroxiredoxin-6 (EC 1.11.1.15) OS=Homo sapiens PE=4 SV=1	>sp|P30041|PRDX6_HUMAN Peroxiredoxin-6 OS=Homo sapiens GN=PRDX6 PE=1 SV=3;>tr|B4DUK1|B4DUK1_HUMAN cDNA FLJ51310, moderately similar to Peroxiredoxin-6 (EC 1.11.1.15) OS=Homo sapiens PE=4 SV=1	>sp|P30041|PRDX6_HUMAN Peroxiredoxin-6 OS=Homo sapiens GN=PRDX6 PE=1 SV=3;>tr|B4DUK1|B4DUK1_HUMAN cDNA FLJ51310, moderately similar to Peroxiredoxin-6 (EC 1.11.1.15) OS=Homo sapiens PE=4 SV=1	2	1	1	9.4	25.035	3809800	3358800	3208500	753400	781670	0	59873000	55779000	47268000	26195000	28133000	0
>sp|P30044|PRDX5_HUMAN Peroxiredoxin-5, mitochondrial OS=Homo sapiens GN=PRDX5 PE=1 SV=4;>tr|A6NG06|A6NG06_HUMAN Peroxiredoxin-5, mitochondrial OS=Homo sapiens GN=PRDX5 PE=4 SV=1;>tr|B7ZLJ4|B7ZLJ4_HUMAN Peroxiredoxin 5 OS=Homo sapiens GN=PRDX5 PE=2 SV=1;>tr|A6NC19|A6NC19_HUMAN Peroxiredoxin-5, mitochondrial OS=Homo sapiens GN=PRDX5 PE=4 SV=1;>tr|B7ZVW3|B7ZVW3_HUMAN Peroxiredoxin 5 OS=Homo sapiens…	>sp|P30044|PRDX5_HUMAN Peroxiredoxin-5, mitochondrial OS=Homo sapiens GN=PRDX5 PE=1 SV=4;>tr|A6NG06|A6NG06_HUMAN Peroxiredoxin-5, mitochondrial OS=Homo sapiens GN=PRDX5 PE=4 SV=1;>tr|B7ZLJ4|B7ZLJ4_HUMAN Peroxiredoxin 5 OS=Homo sapiens GN=PRDX5 PE=2 SV=1;>tr|A6NC19|A6NC19_HUMAN Peroxiredoxin-5, mitochondrial OS=Homo sapiens GN=PRDX5 PE=4 SV=1;>tr|B7ZVW3|B7ZVW3_HUMAN Peroxiredoxin 5 OS=Homo sapiens…	>sp|P30044|PRDX5_HUMAN Peroxiredoxin-5, mitochondrial OS=Homo sapiens GN=PRDX5 PE=1 SV=4;>tr|A6NG06|A6NG06_HUMAN Peroxiredoxin-5, mitochondrial OS=Homo sapiens GN=PRDX5 PE=4 SV=1;>tr|B7ZLJ4|B7ZLJ4_HUMAN Peroxiredoxin 5 OS=Homo sapiens GN=PRDX5 PE=2 SV=1;>t	5	7	7	51.4	22.086	24982000	33760000	32005000	2639900	2182500	1539500	431650000	453040000	369730000	104060000	95409000	67051000
>tr|B2R6S5|B2R6S5_HUMAN Cytidylate kinase, isoform CRA_a OS=Homo sapiens GN=CMPK PE=2 SV=1;>sp|P30085|KCY_HUMAN UMP-CMP kinase OS=Homo sapiens GN=CMPK1 PE=1 SV=3;>tr|B4DDL4|B4DDL4_HUMAN cDNA FLJ53966, moderately similar to Homo sapiens cytidylate kinase (CMPK), mRNA OS=Homo sapiens PE=2 SV=1;>tr|B4DPU7|B4DPU7_HUMAN cDNA FLJ53623, moderately similar to Homo sapiens cytidylate kinase (CMPK), mRNA O…	>tr|B2R6S5|B2R6S5_HUMAN Cytidylate kinase, isoform CRA_a OS=Homo sapiens GN=CMPK PE=2 SV=1;>sp|P30085|KCY_HUMAN UMP-CMP kinase OS=Homo sapiens GN=CMPK1 PE=1 SV=3;>tr|B4DDL4|B4DDL4_HUMAN cDNA FLJ53966, moderately similar to Homo sapiens cytidylate kinase (CMPK), mRNA OS=Homo sapiens PE=2 SV=1;>tr|B4DPU7|B4DPU7_HUMAN cDNA FLJ53623, moderately similar to Homo sapiens cytidylate kinase (CMPK), mRNA O…	>tr|B2R6S5|B2R6S5_HUMAN Cytidylate kinase, isoform CRA_a OS=Homo sapiens GN=CMPK PE=2 SV=1;>sp|P30085|KCY_HUMAN UMP-CMP kinase OS=Homo sapiens GN=CMPK1 PE=1 SV=3;>tr|B4DDL4|B4DDL4_HUMAN cDNA FLJ53966, moderately similar to Homo sapiens cytidylate kinase (C	5	1	1	6.6	25.855	0	1653600	0	0	0	0	0	22716000	0	0	0	0
>sp|P30086|PEBP1_HUMAN Phosphatidylethanolamine-binding protein 1 OS=Homo sapiens GN=PEBP1 PE=1 SV=3;>tr|D9IAI1|D9IAI1_HUMAN Phosphatidylethanolamine-binding protein 1 OS=Homo sapiens PE=2 SV=1;>tr|B4DRT4|B4DRT4_HUMAN cDNA FLJ51535, highly similar to Phosphatidylethanolamine-binding protein 1 OS=Homo sapiens PE=2 SV=1	>sp|P30086|PEBP1_HUMAN Phosphatidylethanolamine-binding protein 1 OS=Homo sapiens GN=PEBP1 PE=1 SV=3;>tr|D9IAI1|D9IAI1_HUMAN Phosphatidylethanolamine-binding protein 1 OS=Homo sapiens PE=2 SV=1	>sp|P30086|PEBP1_HUMAN Phosphatidylethanolamine-binding protein 1 OS=Homo sapiens GN=PEBP1 PE=1 SV=3;>tr|D9IAI1|D9IAI1_HUMAN Phosphatidylethanolamine-binding protein 1 OS=Homo sapiens PE=2 SV=1	3	3	3	24.6	21.057	2672700	10077000	12457000	2532700	2452000	2081200	0	74916000	103200000	74675000	75427000	67867000
>sp|P30101|PDIA3_HUMAN Protein disulfide-isomerase A3 OS=Homo sapiens GN=PDIA3 PE=1 SV=4;>tr|B3KQT2|B3KQT2_HUMAN cDNA PSEC0148 fis, clone PLACE1007202, highly similar to Protein disulfide-isomerase A3 (EC 5.3.4.1) OS=Homo sapiens PE=2 SV=1;>tr|G5EA52|G5EA52_HUMAN Protein disulfide isomerase family A, member 3, isoform CRA_b OS=Homo sapiens GN=PDIA3 PE=3 SV=1;>tr|B3KQT9|B3KQT9_HUMAN cDNA PSEC0175 …	>sp|P30101|PDIA3_HUMAN Protein disulfide-isomerase A3 OS=Homo sapiens GN=PDIA3 PE=1 SV=4;>tr|B3KQT2|B3KQT2_HUMAN cDNA PSEC0148 fis, clone PLACE1007202, highly similar to Protein disulfide-isomerase A3 (EC 5.3.4.1) OS=Homo sapiens PE=2 SV=1;>tr|G5EA52|G5EA52_HUMAN Protein disulfide isomerase family A, member 3, isoform CRA_b OS=Homo sapiens GN=PDIA3 PE=3 SV=1;>tr|B3KQT9|B3KQT9_HUMAN cDNA PSEC0175 …	>sp|P30101|PDIA3_HUMAN Protein disulfide-isomerase A3 OS=Homo sapiens GN=PDIA3 PE=1 SV=4;>tr|B3KQT2|B3KQT2_HUMAN cDNA PSEC0148 fis, clone PLACE1007202, highly similar to Protein disulfide-isomerase A3 (EC 5.3.4.1) OS=Homo sapiens PE=2 SV=1;>tr|G5EA52|G5EA5	5	1	1	2.4	56.782	1489900	1159600	1287500	244150	224580	300790	43207000	35535000	35002000	16604000	16095000	20562000
>sp|P30740|ILEU_HUMAN Leukocyte elastase inhibitor OS=Homo sapiens GN=SERPINB1 PE=1 SV=1;>tr|B4E3A8|B4E3A8_HUMAN cDNA FLJ53963, highly similar to Leukocyte elastase inhibitor OS=Homo sapiens PE=2 SV=1;>tr|B4DNT0|B4DNT0_HUMAN Leukocyte elastase inhibitor OS=Homo sapiens GN=SERPINB1 PE=2 SV=1	>sp|P30740|ILEU_HUMAN Leukocyte elastase inhibitor OS=Homo sapiens GN=SERPINB1 PE=1 SV=1;>tr|B4E3A8|B4E3A8_HUMAN cDNA FLJ53963, highly similar to Leukocyte elastase inhibitor OS=Homo sapiens PE=2 SV=1;>tr|B4DNT0|B4DNT0_HUMAN Leukocyte elastase inhibitor OS=Homo sapiens GN=SERPINB1 PE=2 SV=1	>sp|P30740|ILEU_HUMAN Leukocyte elastase inhibitor OS=Homo sapiens GN=SERPINB1 PE=1 SV=1;>tr|B4E3A8|B4E3A8_HUMAN cDNA FLJ53963, highly similar to Leukocyte elastase inhibitor OS=Homo sapiens PE=2 SV=1;>tr|B4DNT0|B4DNT0_HUMAN Leukocyte elastase inhibitor OS	3	9	9	26.6	42.741	17529000	23649000	24773000	439560	463550	1047100	417520000	385650000	370520000	47951000	65832000	77181000
>tr|Q6PKA6|Q6PKA6_HUMAN Aldehyde dehydrogenase (Fragment) OS=Homo sapiens GN=ALDH3A1 PE=2 SV=1;>sp|P30838|AL3A1_HUMAN Aldehyde dehydrogenase, dimeric NADP-preferring OS=Homo sapiens GN=ALDH3A1 PE=1 SV=3;>tr|E9PNN6|E9PNN6_HUMAN Aldehyde dehydrogenase, dimeric NADP-preferring OS=Homo sapiens GN=ALDH3A1 PE=3 SV=1;>tr|A8MYB8|A8MYB8_HUMAN Aldehyde dehydrogenase, dimeric NADP-preferring OS=Homo sapiens…	>tr|Q6PKA6|Q6PKA6_HUMAN Aldehyde dehydrogenase (Fragment) OS=Homo sapiens GN=ALDH3A1 PE=2 SV=1;>sp|P30838|AL3A1_HUMAN Aldehyde dehydrogenase, dimeric NADP-preferring OS=Homo sapiens GN=ALDH3A1 PE=1 SV=3;>tr|E9PNN6|E9PNN6_HUMAN Aldehyde dehydrogenase, dimeric NADP-preferring OS=Homo sapiens GN=ALDH3A1 PE=3 SV=1;>tr|A8MYB8|A8MYB8_HUMAN Aldehyde dehydrogenase, dimeric NADP-preferring OS=Homo sapiens…	>tr|Q6PKA6|Q6PKA6_HUMAN Aldehyde dehydrogenase (Fragment) OS=Homo sapiens GN=ALDH3A1 PE=2 SV=1;>sp|P30838|AL3A1_HUMAN Aldehyde dehydrogenase, dimeric NADP-preferring OS=Homo sapiens GN=ALDH3A1 PE=1 SV=3;>tr|E9PNN6|E9PNN6_HUMAN Aldehyde dehydrogenase, dimer	23	7	7	14.3	57.509	9938800	10681000	10164000	0	0	0	233530000	234520000	244650000	0	0	0
>sp|P31025|LCN1_HUMAN Lipocalin-1 OS=Homo sapiens GN=LCN1 PE=1 SV=1;>sp|Q5VSP4|LC1L1_HUMAN Putative lipocalin 1-like protein 1 OS=Homo sapiens GN=LCN1P1 PE=5 SV=1	>sp|P31025|LCN1_HUMAN Lipocalin-1 OS=Homo sapiens GN=LCN1 PE=1 SV=1	>sp|P31025|LCN1_HUMAN Lipocalin-1 OS=Homo sapiens GN=LCN1 PE=1 SV=1	2	16	16	71	19.25	16571000000	16329000000	16838000000	23361000000	22735000000	23299000000	133890000000	137070000000	132870000000	457010000000	426940000000	435720000000
>tr|Q59G88|Q59G88_HUMAN Coronin (Fragment) OS=Homo sapiens PE=3 SV=1;>sp|P31146|COR1A_HUMAN Coronin-1A OS=Homo sapiens GN=CORO1A PE=1 SV=4	>tr|Q59G88|Q59G88_HUMAN Coronin (Fragment) OS=Homo sapiens PE=3 SV=1;>sp|P31146|COR1A_HUMAN Coronin-1A OS=Homo sapiens GN=CORO1A PE=1 SV=4	>tr|Q59G88|Q59G88_HUMAN Coronin (Fragment) OS=Homo sapiens PE=3 SV=1;>sp|P31146|COR1A_HUMAN Coronin-1A OS=Homo sapiens GN=CORO1A PE=1 SV=4	2	1	1	2.9	59.613	0	1860400	2339700	257890	248550	304300	0	40013000	74151000	22193000	22366000	24170000
>sp|P31946|1433B_HUMAN 14-3-3 protein beta/alpha OS=Homo sapiens GN=YWHAB PE=1 SV=3;>tr|B5BU24|B5BU24_HUMAN 14-3-3 protein beta/alpha OS=Homo sapiens GN=YWHAB PE=2 SV=1;>sp|Q04917|1433F_HUMAN 14-3-3 protein eta OS=Homo sapiens GN=YWHAH PE=1 SV=4;>tr|B2R6N6|B2R6N6_HUMAN cDNA, FLJ93036, highly similar to Homo sapiens tyrosine 3-monooxygenase/tryptophan 5-monooxygenaseactivation protein, eta polypep…	>sp|P31946|1433B_HUMAN 14-3-3 protein beta/alpha OS=Homo sapiens GN=YWHAB PE=1 SV=3;>tr|B5BU24|B5BU24_HUMAN 14-3-3 protein beta/alpha OS=Homo sapiens GN=YWHAB PE=2 SV=1	>sp|P31946|1433B_HUMAN 14-3-3 protein beta/alpha OS=Homo sapiens GN=YWHAB PE=1 SV=3;>tr|B5BU24|B5BU24_HUMAN 14-3-3 protein beta/alpha OS=Homo sapiens GN=YWHAB PE=2 SV=1	12	8	4	36.6	28.082	3708200	6615800	9764700	454650	441530	0	82899000	87558000	90466000	36473000	37111000	0
>sp|P31947|1433S_HUMAN 14-3-3 protein sigma OS=Homo sapiens GN=SFN PE=1 SV=1	>sp|P31947|1433S_HUMAN 14-3-3 protein sigma OS=Homo sapiens GN=SFN PE=1 SV=1	>sp|P31947|1433S_HUMAN 14-3-3 protein sigma OS=Homo sapiens GN=SFN PE=1 SV=1	1	6	4	23.8	27.774	7082200	11369000	14073000	0	0	0	86831000	208350000	152190000	0	0	0
>sp|P31949|S10AB_HUMAN Protein S100-A11 OS=Homo sapiens GN=S100A11 PE=1 SV=2;>tr|B2R5H0|B2R5H0_HUMAN cDNA, FLJ92471, highly similar to Homo sapiens S100 calcium binding protein A11 (calgizzarin) (S100A11), mRNA OS=Homo sapiens PE=4 SV=1	>sp|P31949|S10AB_HUMAN Protein S100-A11 OS=Homo sapiens GN=S100A11 PE=1 SV=2;>tr|B2R5H0|B2R5H0_HUMAN cDNA, FLJ92471, highly similar to Homo sapiens S100 calcium binding protein A11 (calgizzarin) (S100A11), mRNA OS=Homo sapiens PE=4 SV=1	>sp|P31949|S10AB_HUMAN Protein S100-A11 OS=Homo sapiens GN=S100A11 PE=1 SV=2;>tr|B2R5H0|B2R5H0_HUMAN cDNA, FLJ92471, highly similar to Homo sapiens S100 calcium binding protein A11 (calgizzarin) (S100A11), mRNA OS=Homo sapiens PE=4 SV=1	2	4	4	39	11.74	159030000	80496000	96895000	23319000	23484000	23434000	568080000	628050000	687360000	208570000	301830000	153460000
>sp|P34096|RNAS4_HUMAN Ribonuclease 4 OS=Homo sapiens GN=RNASE4 PE=1 SV=3;>tr|Q53XB4|Q53XB4_HUMAN Full-length cDNA clone CS0DF032YM23 of Fetal brain of Homo sapiens (human) OS=Homo sapiens GN=hCG_2044782 PE=2 SV=1	>sp|P34096|RNAS4_HUMAN Ribonuclease 4 OS=Homo sapiens GN=RNASE4 PE=1 SV=3;>tr|Q53XB4|Q53XB4_HUMAN Full-length cDNA clone CS0DF032YM23 of Fetal brain of Homo sapiens (human) OS=Homo sapiens GN=hCG_2044782 PE=2 SV=1	>sp|P34096|RNAS4_HUMAN Ribonuclease 4 OS=Homo sapiens GN=RNASE4 PE=1 SV=3;>tr|Q53XB4|Q53XB4_HUMAN Full-length cDNA clone CS0DF032YM23 of Fetal brain of Homo sapiens (human) OS=Homo sapiens GN=hCG_2044782 PE=2 SV=1	2	3	3	25.2	16.84	3154500	11735000	15316000	25399000	18555000	21906000	70626000	56798000	82598000	482040000	396990000	419880000
>sp|P35321|SPR1A_HUMAN Cornifin-A OS=Homo sapiens GN=SPRR1A PE=1 SV=2;>sp|P22528|SPR1B_HUMAN Cornifin-B OS=Homo sapiens GN=SPRR1B PE=1 SV=2;>tr|B7ZLF8|B7ZLF8_HUMAN Putative uncharacterized protein OS=Homo sapiens PE=4 SV=1;>tr|E7ETD7|E7ETD7_HUMAN Cornifin-B OS=Homo sapiens GN=SPRR1B PE=4 SV=1;>tr|Q2I377|Q2I377_HUMAN Small proline rich protein OS=Homo sapiens PE=2 SV=1	>sp|P35321|SPR1A_HUMAN Cornifin-A OS=Homo sapiens GN=SPRR1A PE=1 SV=2;>sp|P22528|SPR1B_HUMAN Cornifin-B OS=Homo sapiens GN=SPRR1B PE=1 SV=2;>tr|B7ZLF8|B7ZLF8_HUMAN Putative uncharacterized protein OS=Homo sapiens PE=4 SV=1;>tr|E7ETD7|E7ETD7_HUMAN Cornifin-B OS=Homo sapiens GN=SPRR1B PE=4 SV=1;>tr|Q2I377|Q2I377_HUMAN Small proline rich protein OS=Homo sapiens PE=2 SV=1	>sp|P35321|SPR1A_HUMAN Cornifin-A OS=Homo sapiens GN=SPRR1A PE=1 SV=2;>sp|P22528|SPR1B_HUMAN Cornifin-B OS=Homo sapiens GN=SPRR1B PE=1 SV=2;>tr|B7ZLF8|B7ZLF8_HUMAN Putative uncharacterized protein OS=Homo sapiens PE=4 SV=1;>tr|E7ETD7|E7ETD7_HUMAN Cornifin-	5	2	2	16.9	9.8774	10312000	22754000	30070000	1222200	1133600	1522400	186980000	194790000	168440000	31629000	31057000	65068000
>sp|P35606|COPB2_HUMAN Coatomer subunit beta' OS=Homo sapiens GN=COPB2 PE=1 SV=2;>tr|B4DZI8|B4DZI8_HUMAN Coatomer protein complex, subunit beta 2 (Beta prime), isoform CRA_b OS=Homo sapiens GN=COPB2 PE=2 SV=1	>sp|P35606|COPB2_HUMAN Coatomer subunit beta' OS=Homo sapiens GN=COPB2 PE=1 SV=2;>tr|B4DZI8|B4DZI8_HUMAN Coatomer protein complex, subunit beta 2 (Beta prime), isoform CRA_b OS=Homo sapiens GN=COPB2 PE=2 SV=1	>sp|P35606|COPB2_HUMAN Coatomer subunit beta OS=Homo sapiens GN=COPB2 PE=1 SV=2;>tr|B4DZI8|B4DZI8_HUMAN Coatomer protein complex, subunit beta 2 (Beta prime), isoform CRA_b OS=Homo sapiens GN=COPB2 PE=2 SV=1	2	1	1	1.1	102.49	270950	256160	286530	0	0	0	0	0	12893000	0	0	0
>sp|P36952|SPB5_HUMAN Serpin B5 OS=Homo sapiens GN=SERPINB5 PE=1 SV=2;>tr|B4DWS9|B4DWS9_HUMAN cDNA FLJ57640, highly similar to Serpin B5 OS=Homo sapiens PE=2 SV=1;>tr|C9JLM5|C9JLM5_HUMAN Serpin B5 (Fragment) OS=Homo sapiens GN=SERPINB5 PE=4 SV=1	>sp|P36952|SPB5_HUMAN Serpin B5 OS=Homo sapiens GN=SERPINB5 PE=1 SV=2;>tr|B4DWS9|B4DWS9_HUMAN cDNA FLJ57640, highly similar to Serpin B5 OS=Homo sapiens PE=2 SV=1;>tr|C9JLM5|C9JLM5_HUMAN Serpin B5 (Fragment) OS=Homo sapiens GN=SERPINB5 PE=4 SV=1	>sp|P36952|SPB5_HUMAN Serpin B5 OS=Homo sapiens GN=SERPINB5 PE=1 SV=2;>tr|B4DWS9|B4DWS9_HUMAN cDNA FLJ57640, highly similar to Serpin B5 OS=Homo sapiens PE=2 SV=1;>tr|C9JLM5|C9JLM5_HUMAN Serpin B5 (Fragment) OS=Homo sapiens GN=SERPINB5 PE=4 SV=1	3	2	2	7.5	42.1	741840	960310	801560	91257	92278	0	20673000	23626000	20940000	8370700	8732800	0
>sp|P36955|PEDF_HUMAN Pigment epithelium-derived factor OS=Homo sapiens GN=SERPINF1 PE=1 SV=4;>tr|I3L3M1|I3L3M1_HUMAN Pigment epithelium-derived factor OS=Homo sapiens GN=SERPINF1 PE=3 SV=1;>tr|I3L4N7|I3L4N7_HUMAN Pigment epithelium-derived factor (Fragment) OS=Homo sapiens GN=SERPINF1 PE=3 SV=1;>tr|I3L2R7|I3L2R7_HUMAN Pigment epithelium-derived factor (Fragment) OS=Homo sapiens GN=SERPINF1 PE=4 …	>sp|P36955|PEDF_HUMAN Pigment epithelium-derived factor OS=Homo sapiens GN=SERPINF1 PE=1 SV=4;>tr|I3L3M1|I3L3M1_HUMAN Pigment epithelium-derived factor OS=Homo sapiens GN=SERPINF1 PE=3 SV=1;>tr|I3L4N7|I3L4N7_HUMAN Pigment epithelium-derived factor (Fragment) OS=Homo sapiens GN=SERPINF1 PE=3 SV=1;>tr|I3L2R7|I3L2R7_HUMAN Pigment epithelium-derived factor (Fragment) OS=Homo sapiens GN=SERPINF1 PE=4 …	>sp|P36955|PEDF_HUMAN Pigment epithelium-derived factor OS=Homo sapiens GN=SERPINF1 PE=1 SV=4;>tr|I3L3M1|I3L3M1_HUMAN Pigment epithelium-derived factor OS=Homo sapiens GN=SERPINF1 PE=3 SV=1;>tr|I3L4N7|I3L4N7_HUMAN Pigment epithelium-derived factor (Fragmen	6	2	2	9.3	46.312	0	2710600	2558500	0	0	0	0	47952000	40643000	0	0	0
>sp|P37802|TAGL2_HUMAN Transgelin-2 OS=Homo sapiens GN=TAGLN2 PE=1 SV=3;>tr|B7Z5A2|B7Z5A2_HUMAN cDNA FLJ57759, moderately similar to Transgelin-2 OS=Homo sapiens PE=2 SV=1	>sp|P37802|TAGL2_HUMAN Transgelin-2 OS=Homo sapiens GN=TAGLN2 PE=1 SV=3	>sp|P37802|TAGL2_HUMAN Transgelin-2 OS=Homo sapiens GN=TAGLN2 PE=1 SV=3	2	7	7	48.2	22.391	40037000	37359000	37805000	3738500	3154300	3813000	361210000	392430000	364120000	128980000	113250000	127410000
>sp|P37837|TALDO_HUMAN Transaldolase OS=Homo sapiens GN=TALDO1 PE=1 SV=2;>tr|F2Z393|F2Z393_HUMAN Transaldolase OS=Homo sapiens GN=TALDO1 PE=3 SV=1;>tr|B4DID5|B4DID5_HUMAN Transaldolase 1, isoform CRA_c OS=Homo sapiens GN=TALDO1 PE=2 SV=1	>sp|P37837|TALDO_HUMAN Transaldolase OS=Homo sapiens GN=TALDO1 PE=1 SV=2;>tr|F2Z393|F2Z393_HUMAN Transaldolase OS=Homo sapiens GN=TALDO1 PE=3 SV=1;>tr|B4DID5|B4DID5_HUMAN Transaldolase 1, isoform CRA_c OS=Homo sapiens GN=TALDO1 PE=2 SV=1	>sp|P37837|TALDO_HUMAN Transaldolase OS=Homo sapiens GN=TALDO1 PE=1 SV=2;>tr|F2Z393|F2Z393_HUMAN Transaldolase OS=Homo sapiens GN=TALDO1 PE=3 SV=1;>tr|B4DID5|B4DID5_HUMAN Transaldolase 1, isoform CRA_c OS=Homo sapiens GN=TALDO1 PE=2 SV=1	3	1	1	2.4	37.54	4165600	4135100	5264100	0	0	0	70814000	74284000	83893000	0	0	0
>tr|B7Z3I7|B7Z3I7_HUMAN Malate dehydrogenase OS=Homo sapiens PE=2 SV=1;>tr|F5H098|F5H098_HUMAN Malate dehydrogenase OS=Homo sapiens GN=MDH1 PE=3 SV=1;>sp|P40925|MDHC_HUMAN Malate dehydrogenase, cytoplasmic OS=Homo sapiens GN=MDH1 PE=1 SV=4;>tr|B9A041|B9A041_HUMAN Malate dehydrogenase, cytoplasmic OS=Homo sapiens GN=MDH1 PE=4 SV=1;>tr|C9JF79|C9JF79_HUMAN Malate dehydrogenase (Fragment) OS=Homo sap…	>tr|B7Z3I7|B7Z3I7_HUMAN Malate dehydrogenase OS=Homo sapiens PE=2 SV=1;>tr|F5H098|F5H098_HUMAN Malate dehydrogenase OS=Homo sapiens GN=MDH1 PE=3 SV=1;>sp|P40925|MDHC_HUMAN Malate dehydrogenase, cytoplasmic OS=Homo sapiens GN=MDH1 PE=1 SV=4;>tr|B9A041|B9A041_HUMAN Malate dehydrogenase, cytoplasmic OS=Homo sapiens GN=MDH1 PE=4 SV=1;>tr|C9JF79|C9JF79_HUMAN Malate dehydrogenase (Fragment) OS=Homo sap…	>tr|B7Z3I7|B7Z3I7_HUMAN Malate dehydrogenase OS=Homo sapiens PE=2 SV=1;>tr|F5H098|F5H098_HUMAN Malate dehydrogenase OS=Homo sapiens GN=MDH1 PE=3 SV=1;>sp|P40925|MDHC_HUMAN Malate dehydrogenase, cytoplasmic OS=Homo sapiens GN=MDH1 PE=1 SV=4;>tr|B9A041|B9A04	7	3	3	7.7	38.655	3912400	4661900	1632300	0	0	0	60602000	73539000	67843000	0	0	0
>tr|A8MU24|A8MU24_HUMAN Lysosomal Pro-X carboxypeptidase OS=Homo sapiens GN=PRCP PE=4 SV=1;>tr|B3KRK5|B3KRK5_HUMAN cDNA FLJ34467 fis, clone HLUNG2003246, highly similar to Lysosomal Pro-X carboxypeptidase (EC3.4.16.2) OS=Homo sapiens PE=2 SV=1;>sp|P42785|PCP_HUMAN Lysosomal Pro-X carboxypeptidase OS=Homo sapiens GN=PRCP PE=1 SV=1;>tr|B7Z7Q6|B7Z7Q6_HUMAN Lysosomal Pro-X carboxypeptidase OS=Homo sa…	>tr|A8MU24|A8MU24_HUMAN Lysosomal Pro-X carboxypeptidase OS=Homo sapiens GN=PRCP PE=4 SV=1;>tr|B3KRK5|B3KRK5_HUMAN cDNA FLJ34467 fis, clone HLUNG2003246, highly similar to Lysosomal Pro-X carboxypeptidase (EC3.4.16.2) OS=Homo sapiens PE=2 SV=1;>sp|P42785|PCP_HUMAN Lysosomal Pro-X carboxypeptidase OS=Homo sapiens GN=PRCP PE=1 SV=1;>tr|B7Z7Q6|B7Z7Q6_HUMAN Lysosomal Pro-X carboxypeptidase OS=Homo sa…	>tr|A8MU24|A8MU24_HUMAN Lysosomal Pro-X carboxypeptidase OS=Homo sapiens GN=PRCP PE=4 SV=1;>tr|B3KRK5|B3KRK5_HUMAN cDNA FLJ34467 fis, clone HLUNG2003246, highly similar to Lysosomal Pro-X carboxypeptidase (EC3.4.16.2) OS=Homo sapiens PE=2 SV=1;>sp|P42785|P	9	1	1	2.1	58.099	283210	212500	274220	74334	81902	67030	6230500	4940200	5655500	3835100	4453000	3476100
>tr|A6NHF2|A6NHF2_HUMAN Biotinidase OS=Homo sapiens GN=BTD PE=2 SV=3;>tr|B4DLJ9|B4DLJ9_HUMAN Biotinidase OS=Homo sapiens GN=BTD PE=2 SV=1;>sp|P43251|BTD_HUMAN Biotinidase OS=Homo sapiens GN=BTD PE=1 SV=2;>tr|F8W1Q3|F8W1Q3_HUMAN Biotinidase OS=Homo sapiens GN=BTD PE=4 SV=1	>tr|A6NHF2|A6NHF2_HUMAN Biotinidase OS=Homo sapiens GN=BTD PE=2 SV=3;>tr|B4DLJ9|B4DLJ9_HUMAN Biotinidase OS=Homo sapiens GN=BTD PE=2 SV=1;>sp|P43251|BTD_HUMAN Biotinidase OS=Homo sapiens GN=BTD PE=1 SV=2;>tr|F8W1Q3|F8W1Q3_HUMAN Biotinidase OS=Homo sapiens GN=BTD PE=4 SV=1	>tr|A6NHF2|A6NHF2_HUMAN Biotinidase OS=Homo sapiens GN=BTD PE=2 SV=3;>tr|B4DLJ9|B4DLJ9_HUMAN Biotinidase OS=Homo sapiens GN=BTD PE=2 SV=1;>sp|P43251|BTD_HUMAN Biotinidase OS=Homo sapiens GN=BTD PE=1 SV=2;>tr|F8W1Q3|F8W1Q3_HUMAN Biotinidase OS=Homo sapiens	4	1	1	2.2	61.51	613050	1239400	1693400	767900	662870	811260	14100000	30123000	36513000	41419000	37678000	43984000
>sp|P43652|AFAM_HUMAN Afamin OS=Homo sapiens GN=AFM PE=1 SV=1	>sp|P43652|AFAM_HUMAN Afamin OS=Homo sapiens GN=AFM PE=1 SV=1	>sp|P43652|AFAM_HUMAN Afamin OS=Homo sapiens GN=AFM PE=1 SV=1	1	3	3	7	69.068	1277200	1875000	3046500	0	0	0	86568000	100380000	84307000	0	0	0
>sp|P47895|AL1A3_HUMAN Aldehyde dehydrogenase family 1 member A3 OS=Homo sapiens GN=ALDH1A3 PE=1 SV=2;>tr|B2R5T2|B2R5T2_HUMAN cDNA, FLJ92608, highly similar to Homo sapiens aldehyde dehydrogenase 1 family, member A3 (ALDH1A3), mRNA OS=Homo sapiens PE=2 SV=1;>tr|B4DYU3|B4DYU3_HUMAN cDNA FLJ57235, highly similar to Aldehyde dehydrogenase 1A3 (EC 1.2.1.5) OS=Homo sapiens PE=2 SV=1;>tr|Q7Z3A2|Q7Z3A2_…	>sp|P47895|AL1A3_HUMAN Aldehyde dehydrogenase family 1 member A3 OS=Homo sapiens GN=ALDH1A3 PE=1 SV=2;>tr|B2R5T2|B2R5T2_HUMAN cDNA, FLJ92608, highly similar to Homo sapiens aldehyde dehydrogenase 1 family, member A3 (ALDH1A3), mRNA OS=Homo sapiens PE=2 SV=1;>tr|B4DYU3|B4DYU3_HUMAN cDNA FLJ57235, highly similar to Aldehyde dehydrogenase 1A3 (EC 1.2.1.5) OS=Homo sapiens PE=2 SV=1;>tr|Q7Z3A2|Q7Z3A2_…	>sp|P47895|AL1A3_HUMAN Aldehyde dehydrogenase family 1 member A3 OS=Homo sapiens GN=ALDH1A3 PE=1 SV=2;>tr|B2R5T2|B2R5T2_HUMAN cDNA, FLJ92608, highly similar to Homo sapiens aldehyde dehydrogenase 1 family, member A3 (ALDH1A3), mRNA OS=Homo sapiens PE=2 SV=	9	2	2	3.1	56.108	800250	819350	1106400	0	0	0	33891000	35252000	33876000	0	0	0
>sp|P49788|TIG1_HUMAN Retinoic acid receptor responder protein 1 OS=Homo sapiens GN=RARRES1 PE=2 SV=2;>tr|F8WBG0|F8WBG0_HUMAN Retinoic acid receptor responder protein 1 OS=Homo sapiens GN=RARRES1 PE=4 SV=1	>sp|P49788|TIG1_HUMAN Retinoic acid receptor responder protein 1 OS=Homo sapiens GN=RARRES1 PE=2 SV=2;>tr|F8WBG0|F8WBG0_HUMAN Retinoic acid receptor responder protein 1 OS=Homo sapiens GN=RARRES1 PE=4 SV=1	>sp|P49788|TIG1_HUMAN Retinoic acid receptor responder protein 1 OS=Homo sapiens GN=RARRES1 PE=2 SV=2;>tr|F8WBG0|F8WBG0_HUMAN Retinoic acid receptor responder protein 1 OS=Homo sapiens GN=RARRES1 PE=4 SV=1	2	2	2	7.5	33.285	12214000	13292000	17379000	5609800	7672900	7692100	205140000	193050000	202210000	153130000	236130000	233330000
>tr|F8W1H5|F8W1H5_HUMAN Ras-related protein Rab-5C OS=Homo sapiens GN=RAB5C PE=3 SV=1;>sp|P51148|RAB5C_HUMAN Ras-related protein Rab-5C OS=Homo sapiens GN=RAB5C PE=1 SV=2	>tr|F8W1H5|F8W1H5_HUMAN Ras-related protein Rab-5C OS=Homo sapiens GN=RAB5C PE=3 SV=1;>sp|P51148|RAB5C_HUMAN Ras-related protein Rab-5C OS=Homo sapiens GN=RAB5C PE=1 SV=2	>tr|F8W1H5|F8W1H5_HUMAN Ras-related protein Rab-5C OS=Homo sapiens GN=RAB5C PE=3 SV=1;>sp|P51148|RAB5C_HUMAN Ras-related protein Rab-5C OS=Homo sapiens GN=RAB5C PE=1 SV=2	2	1	1	4.8	27.035	627450	586390	749890	0	0	0	7488500	7645100	8404000	0	0	0
>sp|P52209|6PGD_HUMAN 6-phosphogluconate dehydrogenase, decarboxylating OS=Homo sapiens GN=PGD PE=1 SV=3;>tr|B4DQJ8|B4DQJ8_HUMAN 6-phosphogluconate dehydrogenase, decarboxylating OS=Homo sapiens GN=PGD PE=2 SV=1;>tr|B4E2U0|B4E2U0_HUMAN 6-phosphogluconate dehydrogenase, decarboxylating OS=Homo sapiens PE=2 SV=1;>tr|F5H7U0|F5H7U0_HUMAN 6-phosphogluconate dehydrogenase, decarboxylating OS=Homo sapie…	>sp|P52209|6PGD_HUMAN 6-phosphogluconate dehydrogenase, decarboxylating OS=Homo sapiens GN=PGD PE=1 SV=3;>tr|B4DQJ8|B4DQJ8_HUMAN 6-phosphogluconate dehydrogenase, decarboxylating OS=Homo sapiens GN=PGD PE=2 SV=1;>tr|B4E2U0|B4E2U0_HUMAN 6-phosphogluconate dehydrogenase, decarboxylating OS=Homo sapiens PE=2 SV=1;>tr|F5H7U0|F5H7U0_HUMAN 6-phosphogluconate dehydrogenase, decarboxylating OS=Homo sapie…	>sp|P52209|6PGD_HUMAN 6-phosphogluconate dehydrogenase, decarboxylating OS=Homo sapiens GN=PGD PE=1 SV=3;>tr|B4DQJ8|B4DQJ8_HUMAN 6-phosphogluconate dehydrogenase, decarboxylating OS=Homo sapiens GN=PGD PE=2 SV=1;>tr|B4E2U0|B4E2U0_HUMAN 6-phosphogluconate d	10	3	3	7.2	53.139	561050	2212000	3466800	70238	0	0	43139000	51499000	41865000	12716000	0	0
>tr|B3KUE5|B3KUE5_HUMAN Phospholipid transfer protein OS=Homo sapiens GN=PLTP PE=2 SV=1;>sp|P55058|PLTP_HUMAN Phospholipid transfer protein OS=Homo sapiens GN=PLTP PE=1 SV=1;>tr|Q53H91|Q53H91_HUMAN Phospholipid transfer protein isoform a variant (Fragment) OS=Homo sapiens PE=2 SV=1;>tr|B4DDD5|B4DDD5_HUMAN cDNA FLJ58762, highly similar to Phospholipid transfer protein OS=Homo sapiens PE=2 SV=1;>tr…	>tr|B3KUE5|B3KUE5_HUMAN Phospholipid transfer protein OS=Homo sapiens GN=PLTP PE=2 SV=1;>sp|P55058|PLTP_HUMAN Phospholipid transfer protein OS=Homo sapiens GN=PLTP PE=1 SV=1;>tr|Q53H91|Q53H91_HUMAN Phospholipid transfer protein isoform a variant (Fragment) OS=Homo sapiens PE=2 SV=1;>tr|B4DDD5|B4DDD5_HUMAN cDNA FLJ58762, highly similar to Phospholipid transfer protein OS=Homo sapiens PE=2 SV=1;>tr…	>tr|B3KUE5|B3KUE5_HUMAN Phospholipid transfer protein OS=Homo sapiens GN=PLTP PE=2 SV=1;>sp|P55058|PLTP_HUMAN Phospholipid transfer protein OS=Homo sapiens GN=PLTP PE=1 SV=1;>tr|Q53H91|Q53H91_HUMAN Phospholipid transfer protein isoform a variant (Fragment)	6	6	6	13.5	56.634	15906000	9408500	9171400	19114000	14817000	16089000	254520000	246910000	193470000	838360000	726030000	643320000
>sp|P55072|TERA_HUMAN Transitional endoplasmic reticulum ATPase OS=Homo sapiens GN=VCP PE=1 SV=4;>tr|Q96IF9|Q96IF9_HUMAN VCP protein (Fragment) OS=Homo sapiens GN=VCP PE=2 SV=2;>tr|Q9HAP1|Q9HAP1_HUMAN Valosin-containing protein (Fragment) OS=Homo sapiens GN=VCP PE=1 SV=1	>sp|P55072|TERA_HUMAN Transitional endoplasmic reticulum ATPase OS=Homo sapiens GN=VCP PE=1 SV=4;>tr|Q96IF9|Q96IF9_HUMAN VCP protein (Fragment) OS=Homo sapiens GN=VCP PE=2 SV=2;>tr|Q9HAP1|Q9HAP1_HUMAN Valosin-containing protein (Fragment) OS=Homo sapiens GN=VCP PE=1 SV=1	>sp|P55072|TERA_HUMAN Transitional endoplasmic reticulum ATPase OS=Homo sapiens GN=VCP PE=1 SV=4;>tr|Q96IF9|Q96IF9_HUMAN VCP protein (Fragment) OS=Homo sapiens GN=VCP PE=2 SV=2;>tr|Q9HAP1|Q9HAP1_HUMAN Valosin-containing protein (Fragment) OS=Homo sapiens G	3	1	1	2.1	89.321	0	399630	368850	70493	64970	53031	0	15099000	13215000	8080200	7924500	6706500
>sp|P59665|DEF1_HUMAN Neutrophil defensin 1 OS=Homo sapiens GN=DEFA1 PE=1 SV=1;>sp|P59666|DEF3_HUMAN Neutrophil defensin 3 OS=Homo sapiens GN=DEFA3 PE=1 SV=1;>tr|Q6EZE9|Q6EZE9_HUMAN Defensin, alpha 3, neutrophil-specific OS=Homo sapiens GN=DEFA3 PE=4 SV=1	>sp|P59665|DEF1_HUMAN Neutrophil defensin 1 OS=Homo sapiens GN=DEFA1 PE=1 SV=1;>sp|P59666|DEF3_HUMAN Neutrophil defensin 3 OS=Homo sapiens GN=DEFA3 PE=1 SV=1;>tr|Q6EZE9|Q6EZE9_HUMAN Defensin, alpha 3, neutrophil-specific OS=Homo sapiens GN=DEFA3 PE=4 SV=1	>sp|P59665|DEF1_HUMAN Neutrophil defensin 1 OS=Homo sapiens GN=DEFA1 PE=1 SV=1;>sp|P59666|DEF3_HUMAN Neutrophil defensin 3 OS=Homo sapiens GN=DEFA3 PE=1 SV=1;>tr|Q6EZE9|Q6EZE9_HUMAN Defensin, alpha 3, neutrophil-specific OS=Homo sapiens GN=DEFA3 PE=4 SV=1	3	2	2	19.1	10.201	177670000	162640000	190920000	54943000	55717000	52283000	591260000	528440000	609850000	467130000	458150000	457960000
>sp|P60174|TPIS_HUMAN Triosephosphate isomerase OS=Homo sapiens GN=TPI1 PE=1 SV=3;>tr|Q53HE2|Q53HE2_HUMAN Triosephosphate isomerase (Fragment) OS=Homo sapiens PE=2 SV=1;>tr|B4DUI5|B4DUI5_HUMAN Triosephosphate isomerase OS=Homo sapiens PE=2 SV=1;>tr|Q2QD09|Q2QD09_HUMAN Triosephosphate isomerase (Fragment) OS=Homo sapiens PE=2 SV=1	>sp|P60174|TPIS_HUMAN Triosephosphate isomerase OS=Homo sapiens GN=TPI1 PE=1 SV=3;>tr|Q53HE2|Q53HE2_HUMAN Triosephosphate isomerase (Fragment) OS=Homo sapiens PE=2 SV=1;>tr|B4DUI5|B4DUI5_HUMAN Triosephosphate isomerase OS=Homo sapiens PE=2 SV=1;>tr|Q2QD09|Q2QD09_HUMAN Triosephosphate isomerase (Fragment) OS=Homo sapiens PE=2 SV=1	>sp|P60174|TPIS_HUMAN Triosephosphate isomerase OS=Homo sapiens GN=TPI1 PE=1 SV=3;>tr|Q53HE2|Q53HE2_HUMAN Triosephosphate isomerase (Fragment) OS=Homo sapiens PE=2 SV=1;>tr|B4DUI5|B4DUI5_HUMAN Triosephosphate isomerase OS=Homo sapiens PE=2 SV=1;>tr|Q2QD09|	4	10	10	51.7	30.791	57135000	54102000	68258000	5196400	3960900	3689300	1090800000	1161500000	1211500000	393140000	262920000	235650000
>tr|B4E1U9|B4E1U9_HUMAN cDNA FLJ54776, highly similar to Cell division control protein 42 homolog OS=Homo sapiens PE=2 SV=1;>sp|P60953|CDC42_HUMAN Cell division control protein 42 homolog OS=Homo sapiens GN=CDC42 PE=1 SV=2;>tr|B4DMH5|B4DMH5_HUMAN cDNA FLJ55107, highly similar to Cell division control protein 42 homolog OS=Homo sapiens PE=2 SV=1;>tr|B7ZAY4|B7ZAY4_HUMAN cDNA, FLJ79348, highly simil…	>tr|B4E1U9|B4E1U9_HUMAN cDNA FLJ54776, highly similar to Cell division control protein 42 homolog OS=Homo sapiens PE=2 SV=1;>sp|P60953|CDC42_HUMAN Cell division control protein 42 homolog OS=Homo sapiens GN=CDC42 PE=1 SV=2;>tr|B4DMH5|B4DMH5_HUMAN cDNA FLJ55107, highly similar to Cell division control protein 42 homolog OS=Homo sapiens PE=2 SV=1;>tr|B7ZAY4|B7ZAY4_HUMAN cDNA, FLJ79348, highly simil…	>tr|B4E1U9|B4E1U9_HUMAN cDNA FLJ54776, highly similar to Cell division control protein 42 homolog OS=Homo sapiens PE=2 SV=1;>sp|P60953|CDC42_HUMAN Cell division control protein 42 homolog OS=Homo sapiens GN=CDC42 PE=1 SV=2;>tr|B4DMH5|B4DMH5_HUMAN cDNA FLJ5	25	3	3	16.1	26.528	3153500	8841900	10872000	282240	331100	0	0	59253000	73452000	36826000	40945000	0
>sp|P61106|RAB14_HUMAN Ras-related protein Rab-14 OS=Homo sapiens GN=RAB14 PE=1 SV=4	>sp|P61106|RAB14_HUMAN Ras-related protein Rab-14 OS=Homo sapiens GN=RAB14 PE=1 SV=4	>sp|P61106|RAB14_HUMAN Ras-related protein Rab-14 OS=Homo sapiens GN=RAB14 PE=1 SV=4	1	1	1	4.2	23.897	0	380810	0	0	0	0	0	7096700	0	0	0	0
>sp|P61247|RS3A_HUMAN 40S ribosomal protein S3a OS=Homo sapiens GN=RPS3A PE=1 SV=2;>tr|A8K4W0|A8K4W0_HUMAN cDNA FLJ78591, highly similar to Homo sapiens ribosomal protein S3A (RPS3A), mRNA OS=Homo sapiens PE=2 SV=1;>tr|Q6NXR8|Q6NXR8_HUMAN Ribosomal protein S3A OS=Homo sapiens GN=RPS3A PE=2 SV=1;>tr|D6RAT0|D6RAT0_HUMAN 40S ribosomal protein S3a OS=Homo sapiens GN=RPS3A PE=3 SV=1;>tr|D6RG13|D6RG13_…	>sp|P61247|RS3A_HUMAN 40S ribosomal protein S3a OS=Homo sapiens GN=RPS3A PE=1 SV=2;>tr|A8K4W0|A8K4W0_HUMAN cDNA FLJ78591, highly similar to Homo sapiens ribosomal protein S3A (RPS3A), mRNA OS=Homo sapiens PE=2 SV=1;>tr|Q6NXR8|Q6NXR8_HUMAN Ribosomal protein S3A OS=Homo sapiens GN=RPS3A PE=2 SV=1;>tr|D6RAT0|D6RAT0_HUMAN 40S ribosomal protein S3a OS=Homo sapiens GN=RPS3A PE=3 SV=1;>tr|D6RG13|D6RG13_…	>sp|P61247|RS3A_HUMAN 40S ribosomal protein S3a OS=Homo sapiens GN=RPS3A PE=1 SV=2;>tr|A8K4W0|A8K4W0_HUMAN cDNA FLJ78591, highly similar to Homo sapiens ribosomal protein S3A (RPS3A), mRNA OS=Homo sapiens PE=2 SV=1;>tr|Q6NXR8|Q6NXR8_HUMAN Ribosomal protein	13	1	1	3.8	29.945	1551000	879700	1123100	0	0	0	27085000	16233000	18385000	0	0	0
>sp|P61586|RHOA_HUMAN Transforming protein RhoA OS=Homo sapiens GN=RHOA PE=1 SV=1;>tr|C9JX21|C9JX21_HUMAN Transforming protein RhoA OS=Homo sapiens GN=RHOA PE=3 SV=1;>tr|B4DKN9|B4DKN9_HUMAN cDNA FLJ57740, highly similar to Transforming protein RhoA OS=Homo sapiens PE=2 SV=1;>tr|C9JNR4|C9JNR4_HUMAN Transforming protein RhoA (Fragment) OS=Homo sapiens GN=RHOA PE=3 SV=1;>tr|E9PN11|E9PN11_HUMAN Rho-r…	>sp|P61586|RHOA_HUMAN Transforming protein RhoA OS=Homo sapiens GN=RHOA PE=1 SV=1;>tr|C9JX21|C9JX21_HUMAN Transforming protein RhoA OS=Homo sapiens GN=RHOA PE=3 SV=1;>tr|B4DKN9|B4DKN9_HUMAN cDNA FLJ57740, highly similar to Transforming protein RhoA OS=Homo sapiens PE=2 SV=1;>tr|C9JNR4|C9JNR4_HUMAN Transforming protein RhoA (Fragment) OS=Homo sapiens GN=RHOA PE=3 SV=1;>tr|E9PN11|E9PN11_HUMAN Rho-r…	>sp|P61586|RHOA_HUMAN Transforming protein RhoA OS=Homo sapiens GN=RHOA PE=1 SV=1;>tr|C9JX21|C9JX21_HUMAN Transforming protein RhoA OS=Homo sapiens GN=RHOA PE=3 SV=1;>tr|B4DKN9|B4DKN9_HUMAN cDNA FLJ57740, highly similar to Transforming protein RhoA OS=Homo	15	4	4	30.6	21.768	2889300	9558900	10875000	0	303600	0	67584000	61905000	63808000	0	17551000	0
>sp|P61626|LYSC_HUMAN Lysozyme C OS=Homo sapiens GN=LYZ PE=1 SV=1;>tr|B2R4C5|B2R4C5_HUMAN Lysozyme OS=Homo sapiens GN=LYZ PE=2 SV=1;>tr|F8VV32|F8VV32_HUMAN Lysozyme C OS=Homo sapiens GN=LYZ PE=3 SV=1	>sp|P61626|LYSC_HUMAN Lysozyme C OS=Homo sapiens GN=LYZ PE=1 SV=1;>tr|B2R4C5|B2R4C5_HUMAN Lysozyme OS=Homo sapiens GN=LYZ PE=2 SV=1;>tr|F8VV32|F8VV32_HUMAN Lysozyme C OS=Homo sapiens GN=LYZ PE=3 SV=1	>sp|P61626|LYSC_HUMAN Lysozyme C OS=Homo sapiens GN=LYZ PE=1 SV=1;>tr|B2R4C5|B2R4C5_HUMAN Lysozyme OS=Homo sapiens GN=LYZ PE=2 SV=1;>tr|F8VV32|F8VV32_HUMAN Lysozyme C OS=Homo sapiens GN=LYZ PE=3 SV=1	3	12	12	68.9	16.537	7897900000	8117100000	8966600000	12870000000	12095000000	12986000000	64081000000	68978000000	65463000000	303920000000	284900000000	284410000000
>tr|B4E0X1|B4E0X1_HUMAN cDNA FLJ57067, highly similar to Beta-2-microglobulin OS=Homo sapiens PE=2 SV=1;>tr|F5H6I0|F5H6I0_HUMAN Beta-2-microglobulin form pI 5.3 OS=Homo sapiens GN=B2M PE=3 SV=1;>sp|P61769|B2MG_HUMAN Beta-2-microglobulin OS=Homo sapiens GN=B2M PE=1 SV=1;>tr|A6XMH4|A6XMH4_HUMAN Beta-2-microglobulin OS=Homo sapiens PE=2 SV=1;>tr|A6XMH5|A6XMH5_HUMAN Beta-2-microglobulin OS=Homo sapie…	>tr|B4E0X1|B4E0X1_HUMAN cDNA FLJ57067, highly similar to Beta-2-microglobulin OS=Homo sapiens PE=2 SV=1;>tr|F5H6I0|F5H6I0_HUMAN Beta-2-microglobulin form pI 5.3 OS=Homo sapiens GN=B2M PE=3 SV=1;>sp|P61769|B2MG_HUMAN Beta-2-microglobulin OS=Homo sapiens GN=B2M PE=1 SV=1;>tr|A6XMH4|A6XMH4_HUMAN Beta-2-microglobulin OS=Homo sapiens PE=2 SV=1;>tr|A6XMH5|A6XMH5_HUMAN Beta-2-microglobulin OS=Homo sapie…	>tr|B4E0X1|B4E0X1_HUMAN cDNA FLJ57067, highly similar to Beta-2-microglobulin OS=Homo sapiens PE=2 SV=1;>tr|F5H6I0|F5H6I0_HUMAN Beta-2-microglobulin form pI 5.3 OS=Homo sapiens GN=B2M PE=3 SV=1;>sp|P61769|B2MG_HUMAN Beta-2-microglobulin OS=Homo sapiens GN=	7	4	4	40.2	13.946	687180000	564370000	733080000	975160000	816560000	996960000	3971600000	3227400000	3503300000	14278000000	13562000000	14055000000
>tr|G3V3D1|G3V3D1_HUMAN Epididymal secretory protein E1 (Fragment) OS=Homo sapiens GN=NPC2 PE=4 SV=1;>tr|B4DV10|B4DV10_HUMAN cDNA FLJ59142, highly similar to Epididymal secretory protein E1 OS=Homo sapiens PE=2 SV=1;>tr|E7EMS2|E7EMS2_HUMAN Epididymal secretory protein E1 OS=Homo sapiens GN=NPC2 PE=4 SV=1;>tr|G3V3E8|G3V3E8_HUMAN Epididymal secretory protein E1 OS=Homo sapiens GN=NPC2 PE=4 SV=1;>tr…	>tr|G3V3D1|G3V3D1_HUMAN Epididymal secretory protein E1 (Fragment) OS=Homo sapiens GN=NPC2 PE=4 SV=1;>tr|B4DV10|B4DV10_HUMAN cDNA FLJ59142, highly similar to Epididymal secretory protein E1 OS=Homo sapiens PE=2 SV=1;>tr|E7EMS2|E7EMS2_HUMAN Epididymal secretory protein E1 OS=Homo sapiens GN=NPC2 PE=4 SV=1;>tr|G3V3E8|G3V3E8_HUMAN Epididymal secretory protein E1 OS=Homo sapiens GN=NPC2 PE=4 SV=1;>tr…	>tr|G3V3D1|G3V3D1_HUMAN Epididymal secretory protein E1 (Fragment) OS=Homo sapiens GN=NPC2 PE=4 SV=1;>tr|B4DV10|B4DV10_HUMAN cDNA FLJ59142, highly similar to Epididymal secretory protein E1 OS=Homo sapiens PE=2 SV=1;>tr|E7EMS2|E7EMS2_HUMAN Epididymal secre	11	2	2	11.3	23.699	0	0	4737900	2300200	2453700	1502900	0	0	0	62289000	66042000	36679000
>sp|P61981|1433G_HUMAN 14-3-3 protein gamma OS=Homo sapiens GN=YWHAG PE=1 SV=2;>tr|B3KNB4|B3KNB4_HUMAN cDNA FLJ14168 fis, clone NT2RP2001440, highly similar to 14-3-3 protein gamma OS=Homo sapiens PE=2 SV=1;>tr|B4DE78|B4DE78_HUMAN cDNA FLJ52141, highly similar to 14-3-3 protein gamma OS=Homo sapiens PE=2 SV=1;>tr|B4DHC4|B4DHC4_HUMAN cDNA FLJ51843, highly similar to 14-3-3 protein gamma OS=Homo sa…	>sp|P61981|1433G_HUMAN 14-3-3 protein gamma OS=Homo sapiens GN=YWHAG PE=1 SV=2;>tr|B3KNB4|B3KNB4_HUMAN cDNA FLJ14168 fis, clone NT2RP2001440, highly similar to 14-3-3 protein gamma OS=Homo sapiens PE=2 SV=1;>tr|B4DE78|B4DE78_HUMAN cDNA FLJ52141, highly similar to 14-3-3 protein gamma OS=Homo sapiens PE=2 SV=1;>tr|B4DHC4|B4DHC4_HUMAN cDNA FLJ51843, highly similar to 14-3-3 protein gamma OS=Homo sa…	>sp|P61981|1433G_HUMAN 14-3-3 protein gamma OS=Homo sapiens GN=YWHAG PE=1 SV=2;>tr|B3KNB4|B3KNB4_HUMAN cDNA FLJ14168 fis, clone NT2RP2001440, highly similar to 14-3-3 protein gamma OS=Homo sapiens PE=2 SV=1;>tr|B4DE78|B4DE78_HUMAN cDNA FLJ52141, highly sim	4	4	2	15	28.302	1327800	1270400	1844300	0	0	0	21245000	21479000	27663000	0	0	0
>tr|E7EMB3|E7EMB3_HUMAN Calmodulin OS=Homo sapiens GN=CALM2 PE=4 SV=1;>tr|H0Y7A7|H0Y7A7_HUMAN Calmodulin (Fragment) OS=Homo sapiens GN=CALM2 PE=4 SV=1;>tr|A8K1M2|A8K1M2_HUMAN cDNA FLJ75174, highly similar to Homo sapiens calmodulin 1 (phosphorylase kinase, delta), mRNA OS=Homo sapiens PE=2 SV=1;>tr|E7ETZ0|E7ETZ0_HUMAN Calmodulin OS=Homo sapiens GN=CALM1 PE=4 SV=1;>sp|P62158|CALM_HUMAN Calmodulin …	>tr|E7EMB3|E7EMB3_HUMAN Calmodulin OS=Homo sapiens GN=CALM2 PE=4 SV=1;>tr|H0Y7A7|H0Y7A7_HUMAN Calmodulin (Fragment) OS=Homo sapiens GN=CALM2 PE=4 SV=1;>tr|A8K1M2|A8K1M2_HUMAN cDNA FLJ75174, highly similar to Homo sapiens calmodulin 1 (phosphorylase kinase, delta), mRNA OS=Homo sapiens PE=2 SV=1;>tr|E7ETZ0|E7ETZ0_HUMAN Calmodulin OS=Homo sapiens GN=CALM1 PE=4 SV=1;>sp|P62158|CALM_HUMAN Calmodulin …	>tr|E7EMB3|E7EMB3_HUMAN Calmodulin OS=Homo sapiens GN=CALM2 PE=4 SV=1;>tr|H0Y7A7|H0Y7A7_HUMAN Calmodulin (Fragment) OS=Homo sapiens GN=CALM2 PE=4 SV=1;>tr|A8K1M2|A8K1M2_HUMAN cDNA FLJ75174, highly similar to Homo sapiens calmodulin 1 (phosphorylase kinase,	18	3	3	17.9	21.689	5090100	8344000	11304000	0	580000	573150	0	58812000	81814000	0	39161000	37647000
>tr|G9K388|G9K388_HUMAN YWHAE/FAM22A fusion protein (Fragment) OS=Homo sapiens GN=YWHAE/FAM22A fusion PE=2 SV=1;>tr|G9K389|G9K389_HUMAN YWHAE/FAM22B fusion protein (Fragment) OS=Homo sapiens GN=YWHAE/FAM22B fusion PE=2 SV=1;>sp|P62258|1433E_HUMAN 14-3-3 protein epsilon OS=Homo sapiens GN=YWHAE PE=1 SV=1;>tr|B7ZA86|B7ZA86_HUMAN cDNA, FLJ79100, highly similar to 14-3-3 protein epsilon (14-3-3E) OS=…	>tr|G9K388|G9K388_HUMAN YWHAE/FAM22A fusion protein (Fragment) OS=Homo sapiens GN=YWHAE/FAM22A fusion PE=2 SV=1;>tr|G9K389|G9K389_HUMAN YWHAE/FAM22B fusion protein (Fragment) OS=Homo sapiens GN=YWHAE/FAM22B fusion PE=2 SV=1;>sp|P62258|1433E_HUMAN 14-3-3 protein epsilon OS=Homo sapiens GN=YWHAE PE=1 SV=1;>tr|B7ZA86|B7ZA86_HUMAN cDNA, FLJ79100, highly similar to 14-3-3 protein epsilon (14-3-3E) OS=…	>tr|G9K388|G9K388_HUMAN YWHAE/FAM22A fusion protein (Fragment) OS=Homo sapiens GN=YWHAE/FAM22A fusion PE=2 SV=1;>tr|G9K389|G9K389_HUMAN YWHAE/FAM22B fusion protein (Fragment) OS=Homo sapiens GN=YWHAE/FAM22B fusion PE=2 SV=1;>sp|P62258|1433E_HUMAN 14-3-3 pr	11	8	6	23.7	41.224	15595000	15588000	15203000	539340	0	1073900	256500000	257680000	170270000	60290000	0	101450000
>sp|P62805|H4_HUMAN Histone H4 OS=Homo sapiens GN=HIST1H4A PE=1 SV=2;>tr|B2R4R0|B2R4R0_HUMAN Histone H4 OS=Homo sapiens GN=HIST1H4J PE=2 SV=1;>tr|Q0VAS5|Q0VAS5_HUMAN Histone H4 OS=Homo sapiens GN=HIST1H4H PE=2 SV=1	>sp|P62805|H4_HUMAN Histone H4 OS=Homo sapiens GN=HIST1H4A PE=1 SV=2;>tr|B2R4R0|B2R4R0_HUMAN Histone H4 OS=Homo sapiens GN=HIST1H4J PE=2 SV=1;>tr|Q0VAS5|Q0VAS5_HUMAN Histone H4 OS=Homo sapiens GN=HIST1H4H PE=2 SV=1	>sp|P62805|H4_HUMAN Histone H4 OS=Homo sapiens GN=HIST1H4A PE=1 SV=2;>tr|B2R4R0|B2R4R0_HUMAN Histone H4 OS=Homo sapiens GN=HIST1H4J PE=2 SV=1;>tr|Q0VAS5|Q0VAS5_HUMAN Histone H4 OS=Homo sapiens GN=HIST1H4H PE=2 SV=1	3	2	2	21.4	11.367	19686000	3650300	20505000	0	0	0	119620000	0	108270000	0	0	0
>sp|P62937|PPIA_HUMAN Peptidyl-prolyl cis-trans isomerase A OS=Homo sapiens GN=PPIA PE=1 SV=2;>tr|A8K486|A8K486_HUMAN Peptidyl-prolyl cis-trans isomerase OS=Homo sapiens PE=2 SV=1;>tr|B2RE56|B2RE56_HUMAN Peptidyl-prolyl cis-trans isomerase OS=Homo sapiens PE=2 SV=1;>tr|Q71V99|Q71V99_HUMAN Peptidyl-prolyl cis-trans isomerase OS=Homo sapiens PE=2 SV=1;>tr|B4DM82|B4DM82_HUMAN cDNA FLJ53060, moderate…	>sp|P62937|PPIA_HUMAN Peptidyl-prolyl cis-trans isomerase A OS=Homo sapiens GN=PPIA PE=1 SV=2;>tr|A8K486|A8K486_HUMAN Peptidyl-prolyl cis-trans isomerase OS=Homo sapiens PE=2 SV=1;>tr|B2RE56|B2RE56_HUMAN Peptidyl-prolyl cis-trans isomerase OS=Homo sapiens PE=2 SV=1;>tr|Q71V99|Q71V99_HUMAN Peptidyl-prolyl cis-trans isomerase OS=Homo sapiens PE=2 SV=1;>tr|B4DM82|B4DM82_HUMAN cDNA FLJ53060, moderate…	>sp|P62937|PPIA_HUMAN Peptidyl-prolyl cis-trans isomerase A OS=Homo sapiens GN=PPIA PE=1 SV=2;>tr|A8K486|A8K486_HUMAN Peptidyl-prolyl cis-trans isomerase OS=Homo sapiens PE=2 SV=1;>tr|B2RE56|B2RE56_HUMAN Peptidyl-prolyl cis-trans isomerase OS=Homo sapiens	11	4	4	31.5	18.012	25519000	27804000	25249000	0	0	0	236820000	230760000	217790000	0	0	0
>tr|E7EX29|E7EX29_HUMAN 14-3-3 protein zeta/delta (Fragment) OS=Homo sapiens GN=YWHAZ PE=3 SV=1;>sp|P63104|1433Z_HUMAN 14-3-3 protein zeta/delta OS=Homo sapiens GN=YWHAZ PE=1 SV=1;>tr|D0PNI1|D0PNI1_HUMAN Tyrosine 3-monooxygenase/tryptophan 5-monooxygenase activation protein zeta polypeptide OS=Homo sapiens GN=YWHAZ PE=3 SV=1;>tr|B0AZS6|B0AZS6_HUMAN 14-3-3 protein zeta/delta OS=Homo sapiens GN=YWH…	>tr|E7EX29|E7EX29_HUMAN 14-3-3 protein zeta/delta (Fragment) OS=Homo sapiens GN=YWHAZ PE=3 SV=1;>sp|P63104|1433Z_HUMAN 14-3-3 protein zeta/delta OS=Homo sapiens GN=YWHAZ PE=1 SV=1;>tr|D0PNI1|D0PNI1_HUMAN Tyrosine 3-monooxygenase/tryptophan 5-monooxygenase activation protein zeta polypeptide OS=Homo sapiens GN=YWHAZ PE=3 SV=1;>tr|B0AZS6|B0AZS6_HUMAN 14-3-3 protein zeta/delta OS=Homo sapiens GN=YWH…	>tr|E7EX29|E7EX29_HUMAN 14-3-3 protein zeta/delta (Fragment) OS=Homo sapiens GN=YWHAZ PE=3 SV=1;>sp|P63104|1433Z_HUMAN 14-3-3 protein zeta/delta OS=Homo sapiens GN=YWHAZ PE=1 SV=1;>tr|D0PNI1|D0PNI1_HUMAN Tyrosine 3-monooxygenase/tryptophan 5-monooxygenase	15	12	8	50.4	28.036	44047000	47583000	75649000	3612700	3871800	6322900	722230000	730490000	800720000	231500000	269450000	271470000
>sp|P63261|ACTG_HUMAN Actin, cytoplasmic 2 OS=Homo sapiens GN=ACTG1 PE=1 SV=1;>tr|B4E3A4|B4E3A4_HUMAN cDNA FLJ57283, highly similar to Actin, cytoplasmic 2 OS=Homo sapiens PE=2 SV=1;>tr|I3L3I4|I3L3I4_HUMAN Actin, cytoplasmic 2, N-terminally processed OS=Homo sapiens GN=ACTG1 PE=3 SV=1;>tr|B4DVQ0|B4DVQ0_HUMAN cDNA FLJ58286, highly similar to Actin, cytoplasmic 2 OS=Homo sapiens PE=2 SV=1;>tr|I3L4N…	>sp|P63261|ACTG_HUMAN Actin, cytoplasmic 2 OS=Homo sapiens GN=ACTG1 PE=1 SV=1;>tr|B4E3A4|B4E3A4_HUMAN cDNA FLJ57283, highly similar to Actin, cytoplasmic 2 OS=Homo sapiens PE=2 SV=1;>tr|I3L3I4|I3L3I4_HUMAN Actin, cytoplasmic 2, N-terminally processed OS=Homo sapiens GN=ACTG1 PE=3 SV=1;>tr|B4DVQ0|B4DVQ0_HUMAN cDNA FLJ58286, highly similar to Actin, cytoplasmic 2 OS=Homo sapiens PE=2 SV=1;>tr|I3L4N…	>sp|P63261|ACTG_HUMAN Actin, cytoplasmic 2 OS=Homo sapiens GN=ACTG1 PE=1 SV=1;>tr|B4E3A4|B4E3A4_HUMAN cDNA FLJ57283, highly similar to Actin, cytoplasmic 2 OS=Homo sapiens PE=2 SV=1;>tr|I3L3I4|I3L3I4_HUMAN Actin, cytoplasmic 2, N-terminally processed OS=Ho	10	19	1	68.3	41.792	572510000	512910000	576370000	97912000	86835000	97087000	11282000000	11119000000	11052000000	4048800000	4066000000	4297700000
>sp|P68032|ACTC_HUMAN Actin, alpha cardiac muscle 1 OS=Homo sapiens GN=ACTC1 PE=1 SV=1;>sp|P68133|ACTS_HUMAN Actin, alpha skeletal muscle OS=Homo sapiens GN=ACTA1 PE=1 SV=1;>tr|A8K3K1|A8K3K1_HUMAN cDNA FLJ78096, highly similar to Homo sapiens actin, alpha, cardiac muscle (ACTC), mRNA OS=Homo sapiens PE=2 SV=1;>tr|B7Z6P1|B7Z6P1_HUMAN cDNA FLJ53662, highly similar to Actin, alpha skeletal muscle OS…	>sp|P68032|ACTC_HUMAN Actin, alpha cardiac muscle 1 OS=Homo sapiens GN=ACTC1 PE=1 SV=1;>sp|P68133|ACTS_HUMAN Actin, alpha skeletal muscle OS=Homo sapiens GN=ACTA1 PE=1 SV=1;>tr|A8K3K1|A8K3K1_HUMAN cDNA FLJ78096, highly similar to Homo sapiens actin, alpha, cardiac muscle (ACTC), mRNA OS=Homo sapiens PE=2 SV=1;>tr|B7Z6P1|B7Z6P1_HUMAN cDNA FLJ53662, highly similar to Actin, alpha skeletal muscle OS…	>sp|P68032|ACTC_HUMAN Actin, alpha cardiac muscle 1 OS=Homo sapiens GN=ACTC1 PE=1 SV=1;>sp|P68133|ACTS_HUMAN Actin, alpha skeletal muscle OS=Homo sapiens GN=ACTA1 PE=1 SV=1;>tr|A8K3K1|A8K3K1_HUMAN cDNA FLJ78096, highly similar to Homo sapiens actin, alpha,	20	11	1	29.4	42.019	41564000	38950000	37953000	4442400	3348400	3868900	831270000	823190000	711590000	208360000	165500000	182400000
>sp|P68104|EF1A1_HUMAN Elongation factor 1-alpha 1 OS=Homo sapiens GN=EEF1A1 PE=1 SV=1;>sp|Q5VTE0|EF1A3_HUMAN Putative elongation factor 1-alpha-like 3 OS=Homo sapiens GN=EEF1A1P5 PE=5 SV=1;>tr|Q53G85|Q53G85_HUMAN Elongation factor 1-alpha (Fragment) OS=Homo sapiens PE=2 SV=1;>tr|Q53GE9|Q53GE9_HUMAN Elongation factor 1-alpha (Fragment) OS=Homo sapiens PE=2 SV=1;>tr|Q53HM9|Q53HM9_HUMAN Elongation …	>sp|P68104|EF1A1_HUMAN Elongation factor 1-alpha 1 OS=Homo sapiens GN=EEF1A1 PE=1 SV=1;>sp|Q5VTE0|EF1A3_HUMAN Putative elongation factor 1-alpha-like 3 OS=Homo sapiens GN=EEF1A1P5 PE=5 SV=1;>tr|Q53G85|Q53G85_HUMAN Elongation factor 1-alpha (Fragment) OS=Homo sapiens PE=2 SV=1;>tr|Q53GE9|Q53GE9_HUMAN Elongation factor 1-alpha (Fragment) OS=Homo sapiens PE=2 SV=1;>tr|Q53HM9|Q53HM9_HUMAN Elongation …	>sp|P68104|EF1A1_HUMAN Elongation factor 1-alpha 1 OS=Homo sapiens GN=EEF1A1 PE=1 SV=1;>sp|Q5VTE0|EF1A3_HUMAN Putative elongation factor 1-alpha-like 3 OS=Homo sapiens GN=EEF1A1P5 PE=5 SV=1;>tr|Q53G85|Q53G85_HUMAN Elongation factor 1-alpha (Fragment) OS=Ho	39	10	10	27.9	50.14	48111000	50865000	64010000	6020800	5692700	5677700	1060300000	1067100000	1032700000	376130000	436040000	453570000
>sp|P68871|HBB_HUMAN Hemoglobin subunit beta OS=Homo sapiens GN=HBB PE=1 SV=2;>tr|D9YZU5|D9YZU5_HUMAN Hemoglobin, beta OS=Homo sapiens GN=HBB PE=3 SV=1;>tr|C8C504|C8C504_HUMAN Beta-globin OS=Homo sapiens GN=HBB PE=3 SV=1;>tr|Q14473|Q14473_HUMAN Beta-globin gene from a thalassemia patient, OS=Homo sapiens PE=2 SV=1;>tr|B3VL86|B3VL86_HUMAN Mutant beta-globin OS=Homo sapiens GN=HBB PE=3 SV=1;>tr|Q9G…	>sp|P68871|HBB_HUMAN Hemoglobin subunit beta OS=Homo sapiens GN=HBB PE=1 SV=2;>tr|D9YZU5|D9YZU5_HUMAN Hemoglobin, beta OS=Homo sapiens GN=HBB PE=3 SV=1;>tr|C8C504|C8C504_HUMAN Beta-globin OS=Homo sapiens GN=HBB PE=3 SV=1;>tr|Q14473|Q14473_HUMAN Beta-globin gene from a thalassemia patient, OS=Homo sapiens PE=2 SV=1;>tr|B3VL86|B3VL86_HUMAN Mutant beta-globin OS=Homo sapiens GN=HBB PE=3 SV=1;>tr|Q9G…	>sp|P68871|HBB_HUMAN Hemoglobin subunit beta OS=Homo sapiens GN=HBB PE=1 SV=2;>tr|D9YZU5|D9YZU5_HUMAN Hemoglobin, beta OS=Homo sapiens GN=HBB PE=3 SV=1;>tr|C8C504|C8C504_HUMAN Beta-globin OS=Homo sapiens GN=HBB PE=3 SV=1;>tr|Q14473|Q14473_HUMAN Beta-globin	86	10	10	82.3	15.998	278210000	347840000	399090000	8067400	4871400	3206900	2944900000	3156700000	3106700000	181080000	149260000	140740000
>sp|P69905|HBA_HUMAN Hemoglobin subunit alpha OS=Homo sapiens GN=HBA1 PE=1 SV=2;>tr|D1MGQ2|D1MGQ2_HUMAN Alpha-2 globin chain OS=Homo sapiens GN=HBA2 PE=3 SV=1;>tr|I1VZV6|I1VZV6_HUMAN Hemoglobin alpha 1 OS=Homo sapiens GN=HBA1 PE=3 SV=1;>tr|Q9BX83|Q9BX83_HUMAN Hemoglobin alpha 1 globin chain (Fragment) OS=Homo sapiens GN=HBA1 PE=2 SV=1;>tr|E9M4D4|E9M4D4_HUMAN Hemoglobin alpha-1 globin chain (Fragm…	>sp|P69905|HBA_HUMAN Hemoglobin subunit alpha OS=Homo sapiens GN=HBA1 PE=1 SV=2;>tr|D1MGQ2|D1MGQ2_HUMAN Alpha-2 globin chain OS=Homo sapiens GN=HBA2 PE=3 SV=1;>tr|I1VZV6|I1VZV6_HUMAN Hemoglobin alpha 1 OS=Homo sapiens GN=HBA1 PE=3 SV=1;>tr|Q9BX83|Q9BX83_HUMAN Hemoglobin alpha 1 globin chain (Fragment) OS=Homo sapiens GN=HBA1 PE=2 SV=1;>tr|E9M4D4|E9M4D4_HUMAN Hemoglobin alpha-1 globin chain (Fragm…	>sp|P69905|HBA_HUMAN Hemoglobin subunit alpha OS=Homo sapiens GN=HBA1 PE=1 SV=2;>tr|D1MGQ2|D1MGQ2_HUMAN Alpha-2 globin chain OS=Homo sapiens GN=HBA2 PE=3 SV=1;>tr|I1VZV6|I1VZV6_HUMAN Hemoglobin alpha 1 OS=Homo sapiens GN=HBA1 PE=3 SV=1;>tr|Q9BX83|Q9BX83_HU	22	7	7	66.9	15.257	219110000	262830000	318960000	5134300	6079400	5024900	2561500000	1449300000	1327400000	84917000	175710000	100130000
>tr|H9KV70|H9KV70_HUMAN Neutrophil gelatinase-associated lipocalin OS=Homo sapiens GN=LCN2 PE=3 SV=1;>tr|B2ZDQ1|B2ZDQ1_HUMAN Neutrophil gelatinase-associated lipocalin OS=Homo sapiens GN=NGAL PE=2 SV=1;>sp|P80188|NGAL_HUMAN Neutrophil gelatinase-associated lipocalin OS=Homo sapiens GN=LCN2 PE=1 SV=2	>tr|H9KV70|H9KV70_HUMAN Neutrophil gelatinase-associated lipocalin OS=Homo sapiens GN=LCN2 PE=3 SV=1;>tr|B2ZDQ1|B2ZDQ1_HUMAN Neutrophil gelatinase-associated lipocalin OS=Homo sapiens GN=NGAL PE=2 SV=1;>sp|P80188|NGAL_HUMAN Neutrophil gelatinase-associated lipocalin OS=Homo sapiens GN=LCN2 PE=1 SV=2	>tr|H9KV70|H9KV70_HUMAN Neutrophil gelatinase-associated lipocalin OS=Homo sapiens GN=LCN2 PE=3 SV=1;>tr|B2ZDQ1|B2ZDQ1_HUMAN Neutrophil gelatinase-associated lipocalin OS=Homo sapiens GN=NGAL PE=2 SV=1;>sp|P80188|NGAL_HUMAN Neutrophil gelatinase-associated	3	7	7	41	22.902	119990000	144260000	144590000	37367000	37900000	39508000	1192600000	1409300000	1229800000	724040000	766020000	656690000
>sp|P80303|NUCB2_HUMAN Nucleobindin-2 OS=Homo sapiens GN=NUCB2 PE=1 SV=2;>tr|J3KQU0|J3KQU0_HUMAN Nefastin-1 OS=Homo sapiens GN=NUCB2 PE=4 SV=1;>tr|Q2L696|Q2L696_HUMAN Nucb2 splice variant OS=Homo sapiens GN=Nucb2 PE=2 SV=1;>tr|E9PKG6|E9PKG6_HUMAN Nefastin-1 OS=Homo sapiens GN=NUCB2 PE=4 SV=1;>tr|E9PLE9|E9PLE9_HUMAN Nefastin-1 (Fragment) OS=Homo sapiens GN=NUCB2 PE=4 SV=1;>tr|E9PLR0|E9PLR0_HUMAN N…	>sp|P80303|NUCB2_HUMAN Nucleobindin-2 OS=Homo sapiens GN=NUCB2 PE=1 SV=2;>tr|J3KQU0|J3KQU0_HUMAN Nefastin-1 OS=Homo sapiens GN=NUCB2 PE=4 SV=1;>tr|Q2L696|Q2L696_HUMAN Nucb2 splice variant OS=Homo sapiens GN=Nucb2 PE=2 SV=1;>tr|E9PKG6|E9PKG6_HUMAN Nefastin-1 OS=Homo sapiens GN=NUCB2 PE=4 SV=1;>tr|E9PLE9|E9PLE9_HUMAN Nefastin-1 (Fragment) OS=Homo sapiens GN=NUCB2 PE=4 SV=1;>tr|E9PLR0|E9PLR0_HUMAN N…	>sp|P80303|NUCB2_HUMAN Nucleobindin-2 OS=Homo sapiens GN=NUCB2 PE=1 SV=2;>tr|J3KQU0|J3KQU0_HUMAN Nefastin-1 OS=Homo sapiens GN=NUCB2 PE=4 SV=1;>tr|Q2L696|Q2L696_HUMAN Nucb2 splice variant OS=Homo sapiens GN=Nucb2 PE=2 SV=1;>tr|E9PKG6|E9PKG6_HUMAN Nefastin-	15	10	9	26.2	50.195	5862800	15457000	11125000	50503000	45666000	53289000	383520000	540100000	449030000	2055200000	2144000000	2149300000
>sp|P98088|MUC5A_HUMAN Mucin-5AC (Fragments) OS=Homo sapiens GN=MUC5AC PE=1 SV=3;>tr|O75372|O75372_HUMAN Gastric mucin (Fragment) OS=Homo sapiens GN=MUC5AC PE=2 SV=1;>tr|A7Y9J9|A7Y9J9_HUMAN Mucin 5AC, oligomeric mucus/gel-forming OS=Homo sapiens GN=MUC5AC PE=4 SV=1;>tr|E9PJ98|E9PJ98_HUMAN Mucin-5AC (Fragment) OS=Homo sapiens GN=MUC5AC PE=4 SV=1;>tr|E9PGF7|E9PGF7_HUMAN Mucin-5AC OS=Homo sapiens GN…	>sp|P98088|MUC5A_HUMAN Mucin-5AC (Fragments) OS=Homo sapiens GN=MUC5AC PE=1 SV=3;>tr|O75372|O75372_HUMAN Gastric mucin (Fragment) OS=Homo sapiens GN=MUC5AC PE=2 SV=1;>tr|A7Y9J9|A7Y9J9_HUMAN Mucin 5AC, oligomeric mucus/gel-forming OS=Homo sapiens GN=MUC5AC PE=4 SV=1;>tr|E9PJ98|E9PJ98_HUMAN Mucin-5AC (Fragment) OS=Homo sapiens GN=MUC5AC PE=4 SV=1;>tr|E9PGF7|E9PGF7_HUMAN Mucin-5AC OS=Homo sapiens GN…	>sp|P98088|MUC5A_HUMAN Mucin-5AC (Fragments) OS=Homo sapiens GN=MUC5AC PE=1 SV=3;>tr|O75372|O75372_HUMAN Gastric mucin (Fragment) OS=Homo sapiens GN=MUC5AC PE=2 SV=1;>tr|A7Y9J9|A7Y9J9_HUMAN Mucin 5AC, oligomeric mucus/gel-forming OS=Homo sapiens GN=MUC5AC	5	2	2	0.5	526.6	75337	62234	75127	39550	30355	33618	13363000	11574000	12428000	16657000	13004000	14048000
>sp|P98160|PGBM_HUMAN Basement membrane-specific heparan sulfate proteoglycan core protein OS=Homo sapiens GN=HSPG2 PE=1 SV=4;>tr|Q59EG0|Q59EG0_HUMAN Basement membrane-specific heparan sulfate proteoglycan core protein variant (Fragment) OS=Homo sapiens PE=2 SV=1;>tr|H7C4A6|H7C4A6_HUMAN Endorepellin OS=Homo sapiens GN=HSPG2 PE=4 SV=1;>tr|Q2VPA1|Q2VPA1_HUMAN HSPG2 protein (Fragment) OS=Homo sapien…	>sp|P98160|PGBM_HUMAN Basement membrane-specific heparan sulfate proteoglycan core protein OS=Homo sapiens GN=HSPG2 PE=1 SV=4;>tr|Q59EG0|Q59EG0_HUMAN Basement membrane-specific heparan sulfate proteoglycan core protein variant (Fragment) OS=Homo sapiens PE=2 SV=1	>sp|P98160|PGBM_HUMAN Basement membrane-specific heparan sulfate proteoglycan core protein OS=Homo sapiens GN=HSPG2 PE=1 SV=4;>tr|Q59EG0|Q59EG0_HUMAN Basement membrane-specific heparan sulfate proteoglycan core protein variant (Fragment) OS=Homo sapiens PE	7	47	47	13.6	468.83	1856900	5083300	6107600	15610000	13662000	15731000	673170000	617700000	662580000	7282700000	6547800000	6528800000
>sp|Q00839|HNRPU_HUMAN Heterogeneous nuclear ribonucleoprotein U OS=Homo sapiens GN=HNRNPU PE=1 SV=6;>tr|B3KX72|B3KX72_HUMAN cDNA FLJ44920 fis, clone BRAMY3011501, highly similar to Heterogeneous nuclear ribonucleoprotein U OS=Homo sapiens PE=2 SV=1;>tr|Q5RI17|Q5RI17_HUMAN Heterogeneous nuclear ribonucleoprotein U (Scaffold attachment factor A) (Fragment) OS=Homo sapiens GN=HNRNPU PE=2 SV=1;>tr|Q…	>sp|Q00839|HNRPU_HUMAN Heterogeneous nuclear ribonucleoprotein U OS=Homo sapiens GN=HNRNPU PE=1 SV=6;>tr|B3KX72|B3KX72_HUMAN cDNA FLJ44920 fis, clone BRAMY3011501, highly similar to Heterogeneous nuclear ribonucleoprotein U OS=Homo sapiens PE=2 SV=1;>tr|Q5RI17|Q5RI17_HUMAN Heterogeneous nuclear ribonucleoprotein U (Scaffold attachment factor A) (Fragment) OS=Homo sapiens GN=HNRNPU PE=2 SV=1;>tr|Q…	>sp|Q00839|HNRPU_HUMAN Heterogeneous nuclear ribonucleoprotein U OS=Homo sapiens GN=HNRNPU PE=1 SV=6;>tr|B3KX72|B3KX72_HUMAN cDNA FLJ44920 fis, clone BRAMY3011501, highly similar to Heterogeneous nuclear ribonucleoprotein U OS=Homo sapiens PE=2 SV=1;>tr|Q5	4	1	1	2.3	90.583	110640	81521	108450	0	0	0	4146900	3225300	3652000	0	0	0
>sp|Q01469|FABP5_HUMAN Fatty acid-binding protein, epidermal OS=Homo sapiens GN=FABP5 PE=1 SV=3;>tr|E7DVW5|E7DVW5_HUMAN Fatty acid binding protein 5 (Psoriasis-associated) OS=Homo sapiens GN=FABP5 PE=3 SV=1;>tr|I6L8B7|I6L8B7_HUMAN Fatty acid-binding protein, epidermal OS=Homo sapiens GN=FABP5 PE=4 SV=1;>sp|A8MUU1|FB5L3_HUMAN Putative fatty acid-binding protein 5-like protein 3 OS=Homo sapiens GN=…	>sp|Q01469|FABP5_HUMAN Fatty acid-binding protein, epidermal OS=Homo sapiens GN=FABP5 PE=1 SV=3;>tr|E7DVW5|E7DVW5_HUMAN Fatty acid binding protein 5 (Psoriasis-associated) OS=Homo sapiens GN=FABP5 PE=3 SV=1;>tr|I6L8B7|I6L8B7_HUMAN Fatty acid-binding protein, epidermal OS=Homo sapiens GN=FABP5 PE=4 SV=1	>sp|Q01469|FABP5_HUMAN Fatty acid-binding protein, epidermal OS=Homo sapiens GN=FABP5 PE=1 SV=3;>tr|E7DVW5|E7DVW5_HUMAN Fatty acid binding protein 5 (Psoriasis-associated) OS=Homo sapiens GN=FABP5 PE=3 SV=1;>tr|I6L8B7|I6L8B7_HUMAN Fatty acid-binding protei	4	5	5	48.1	15.164	38213000	43864000	48485000	0	395630	562130	413630000	398690000	376930000	0	28766000	36131000
>sp|Q01518|CAP1_HUMAN Adenylyl cyclase-associated protein 1 OS=Homo sapiens GN=CAP1 PE=1 SV=5;>tr|B2RDY9|B2RDY9_HUMAN Adenylyl cyclase-associated protein OS=Homo sapiens PE=2 SV=1;>tr|D3DPU2|D3DPU2_HUMAN Adenylyl cyclase-associated protein OS=Homo sapiens GN=CAP1 PE=3 SV=1;>tr|B4DI38|B4DI38_HUMAN Adenylyl cyclase-associated protein OS=Homo sapiens PE=2 SV=1;>tr|Q5T0R1|Q5T0R1_HUMAN Adenylyl cyclas…	>sp|Q01518|CAP1_HUMAN Adenylyl cyclase-associated protein 1 OS=Homo sapiens GN=CAP1 PE=1 SV=5;>tr|B2RDY9|B2RDY9_HUMAN Adenylyl cyclase-associated protein OS=Homo sapiens PE=2 SV=1;>tr|D3DPU2|D3DPU2_HUMAN Adenylyl cyclase-associated protein OS=Homo sapiens GN=CAP1 PE=3 SV=1;>tr|B4DI38|B4DI38_HUMAN Adenylyl cyclase-associated protein OS=Homo sapiens PE=2 SV=1;>tr|Q5T0R1|Q5T0R1_HUMAN Adenylyl cyclas…	>sp|Q01518|CAP1_HUMAN Adenylyl cyclase-associated protein 1 OS=Homo sapiens GN=CAP1 PE=1 SV=5;>tr|B2RDY9|B2RDY9_HUMAN Adenylyl cyclase-associated protein OS=Homo sapiens PE=2 SV=1;>tr|D3DPU2|D3DPU2_HUMAN Adenylyl cyclase-associated protein OS=Homo sapiens	13	2	2	6.9	51.901	2535500	4939500	3643500	438430	420290	373900	63409000	86601000	100030000	32660000	32926000	28872000
>sp|Q02818|NUCB1_HUMAN Nucleobindin-1 OS=Homo sapiens GN=NUCB1 PE=1 SV=4;>tr|A8K7Q1|A8K7Q1_HUMAN cDNA FLJ77770, highly similar to Homo sapiens nucleobindin 1 (NUCB1), mRNA OS=Homo sapiens PE=2 SV=1;>tr|B4DZX0|B4DZX0_HUMAN cDNA FLJ52898, highly similar to Nucleobindin-1 OS=Homo sapiens PE=2 SV=1;>tr|Q53GX6|Q53GX6_HUMAN Nucleobindin 1 variant (Fragment) OS=Homo sapiens PE=2 SV=1;>tr|H7BZI1|H7BZI1_H…	>sp|Q02818|NUCB1_HUMAN Nucleobindin-1 OS=Homo sapiens GN=NUCB1 PE=1 SV=4;>tr|A8K7Q1|A8K7Q1_HUMAN cDNA FLJ77770, highly similar to Homo sapiens nucleobindin 1 (NUCB1), mRNA OS=Homo sapiens PE=2 SV=1;>tr|B4DZX0|B4DZX0_HUMAN cDNA FLJ52898, highly similar to Nucleobindin-1 OS=Homo sapiens PE=2 SV=1;>tr|Q53GX6|Q53GX6_HUMAN Nucleobindin 1 variant (Fragment) OS=Homo sapiens PE=2 SV=1;>tr|H7BZI1|H7BZI1_H…	>sp|Q02818|NUCB1_HUMAN Nucleobindin-1 OS=Homo sapiens GN=NUCB1 PE=1 SV=4;>tr|A8K7Q1|A8K7Q1_HUMAN cDNA FLJ77770, highly similar to Homo sapiens nucleobindin 1 (NUCB1), mRNA OS=Homo sapiens PE=2 SV=1;>tr|B4DZX0|B4DZX0_HUMAN cDNA FLJ52898, highly similar to N	8	4	3	8.7	53.879	0	785380	1746400	1926300	1627200	1576100	0	20308000	22658000	132330000	136080000	125160000
>sp|Q04828|AK1C1_HUMAN Aldo-keto reductase family 1 member C1 OS=Homo sapiens GN=AKR1C1 PE=1 SV=1;>sp|P52895|AK1C2_HUMAN Aldo-keto reductase family 1 member C2 OS=Homo sapiens GN=AKR1C2 PE=1 SV=3;>tr|B4DK69|B4DK69_HUMAN Aldo-keto reductase family 1 member C2 OS=Homo sapiens GN=AKR1C2 PE=2 SV=1;>tr|H0Y804|H0Y804_HUMAN Aldo-keto reductase family 1 member C1 (Fragment) OS=Homo sapiens GN=AKR1C1 PE=4…	>sp|Q04828|AK1C1_HUMAN Aldo-keto reductase family 1 member C1 OS=Homo sapiens GN=AKR1C1 PE=1 SV=1;>sp|P52895|AK1C2_HUMAN Aldo-keto reductase family 1 member C2 OS=Homo sapiens GN=AKR1C2 PE=1 SV=3;>tr|B4DK69|B4DK69_HUMAN Aldo-keto reductase family 1 member C2 OS=Homo sapiens GN=AKR1C2 PE=2 SV=1;>tr|H0Y804|H0Y804_HUMAN Aldo-keto reductase family 1 member C1 (Fragment) OS=Homo sapiens GN=AKR1C1 PE=4…	>sp|Q04828|AK1C1_HUMAN Aldo-keto reductase family 1 member C1 OS=Homo sapiens GN=AKR1C1 PE=1 SV=1;>sp|P52895|AK1C2_HUMAN Aldo-keto reductase family 1 member C2 OS=Homo sapiens GN=AKR1C2 PE=1 SV=3;>tr|B4DK69|B4DK69_HUMAN Aldo-keto reductase family 1 member	13	5	5	22.9	36.788	5353300	15554000	17509000	1262300	655050	633420	288540000	283530000	273200000	60551000	57981000	54570000
>sp|Q06830|PRDX1_HUMAN Peroxiredoxin-1 OS=Homo sapiens GN=PRDX1 PE=1 SV=1;>tr|B2R4P2|B2R4P2_HUMAN cDNA, FLJ92164, highly similar to Homo sapiens peroxiredoxin 1 (PRDX1), mRNA OS=Homo sapiens PE=2 SV=1;>sp|Q13162|PRDX4_HUMAN Peroxiredoxin-4 OS=Homo sapiens GN=PRDX4 PE=1 SV=1;>tr|H7C3T4|H7C3T4_HUMAN Peroxiredoxin-4 (Fragment) OS=Homo sapiens GN=PRDX4 PE=4 SV=1	>sp|Q06830|PRDX1_HUMAN Peroxiredoxin-1 OS=Homo sapiens GN=PRDX1 PE=1 SV=1;>tr|B2R4P2|B2R4P2_HUMAN cDNA, FLJ92164, highly similar to Homo sapiens peroxiredoxin 1 (PRDX1), mRNA OS=Homo sapiens PE=2 SV=1	>sp|Q06830|PRDX1_HUMAN Peroxiredoxin-1 OS=Homo sapiens GN=PRDX1 PE=1 SV=1;>tr|B2R4P2|B2R4P2_HUMAN cDNA, FLJ92164, highly similar to Homo sapiens peroxiredoxin 1 (PRDX1), mRNA OS=Homo sapiens PE=2 SV=1	4	11	10	68.3	22.11	92664000	102740000	109960000	12354000	6342000	9812600	1599200000	1481800000	1587600000	465830000	381870000	463880000
>sp|Q08380|LG3BP_HUMAN Galectin-3-binding protein OS=Homo sapiens GN=LGALS3BP PE=1 SV=1;>tr|B4DVE1|B4DVE1_HUMAN cDNA FLJ53478, highly similar to Galectin-3-binding protein OS=Homo sapiens PE=2 SV=1;>tr|B4DDG4|B4DDG4_HUMAN cDNA FLJ54583, highly similar to Galectin-3-binding protein OS=Homo sapiens PE=2 SV=1;>tr|B3KP88|B3KP88_HUMAN cDNA FLJ31415 fis, clone NT2NE2000284, highly similar to Galectin-3…	>sp|Q08380|LG3BP_HUMAN Galectin-3-binding protein OS=Homo sapiens GN=LGALS3BP PE=1 SV=1;>tr|B4DVE1|B4DVE1_HUMAN cDNA FLJ53478, highly similar to Galectin-3-binding protein OS=Homo sapiens PE=2 SV=1;>tr|B4DDG4|B4DDG4_HUMAN cDNA FLJ54583, highly similar to Galectin-3-binding protein OS=Homo sapiens PE=2 SV=1;>tr|B3KP88|B3KP88_HUMAN cDNA FLJ31415 fis, clone NT2NE2000284, highly similar to Galectin-3…	>sp|Q08380|LG3BP_HUMAN Galectin-3-binding protein OS=Homo sapiens GN=LGALS3BP PE=1 SV=1;>tr|B4DVE1|B4DVE1_HUMAN cDNA FLJ53478, highly similar to Galectin-3-binding protein OS=Homo sapiens PE=2 SV=1;>tr|B4DDG4|B4DDG4_HUMAN cDNA FLJ54583, highly similar to G	14	13	13	28.7	65.33	26474000	38529000	49044000	62061000	62088000	58219000	1055300000	861530000	792730000	3834100000	3874600000	4033800000
>sp|Q13228|SBP1_HUMAN Selenium-binding protein 1 OS=Homo sapiens GN=SELENBP1 PE=1 SV=2;>tr|B4E1F3|B4E1F3_HUMAN Selenium-binding protein 1 OS=Homo sapiens GN=SELENBP1 PE=2 SV=1;>tr|A6PVW9|A6PVW9_HUMAN Selenium binding protein 1 (Fragment) OS=Homo sapiens GN=SELENBP1 PE=4 SV=1;>tr|B4DPI7|B4DPI7_HUMAN cDNA FLJ52715, highly similar to Selenium-binding protein 1 OS=Homo sapiens PE=2 SV=1;>tr|A6PVX1|A6…	>sp|Q13228|SBP1_HUMAN Selenium-binding protein 1 OS=Homo sapiens GN=SELENBP1 PE=1 SV=2;>tr|B4E1F3|B4E1F3_HUMAN Selenium-binding protein 1 OS=Homo sapiens GN=SELENBP1 PE=2 SV=1;>tr|A6PVW9|A6PVW9_HUMAN Selenium binding protein 1 (Fragment) OS=Homo sapiens GN=SELENBP1 PE=4 SV=1;>tr|B4DPI7|B4DPI7_HUMAN cDNA FLJ52715, highly similar to Selenium-binding protein 1 OS=Homo sapiens PE=2 SV=1;>tr|A6PVX1|A6…	>sp|Q13228|SBP1_HUMAN Selenium-binding protein 1 OS=Homo sapiens GN=SELENBP1 PE=1 SV=2;>tr|B4E1F3|B4E1F3_HUMAN Selenium-binding protein 1 OS=Homo sapiens GN=SELENBP1 PE=2 SV=1;>tr|A6PVW9|A6PVW9_HUMAN Selenium binding protein 1 (Fragment) OS=Homo sapiens GN	11	3	3	7.2	52.39	0	2477300	3250800	0	0	0	0	81221000	103620000	0	0	0
>sp|Q14508|WFDC2_HUMAN WAP four-disulfide core domain protein 2 OS=Homo sapiens GN=WFDC2 PE=1 SV=2	>sp|Q14508|WFDC2_HUMAN WAP four-disulfide core domain protein 2 OS=Homo sapiens GN=WFDC2 PE=1 SV=2	>sp|Q14508|WFDC2_HUMAN WAP four-disulfide core domain protein 2 OS=Homo sapiens GN=WFDC2 PE=1 SV=2	1	3	3	38.7	12.993	14868000	19305000	22114000	5543800	3502300	0	139030000	104200000	111860000	67945000	77023000	0
>sp|Q14515|SPRL1_HUMAN SPARC-like protein 1 OS=Homo sapiens GN=SPARCL1 PE=1 SV=2;>tr|Q8N4S1|Q8N4S1_HUMAN Proliferation-inducing protein 33 OS=Homo sapiens GN=SPARCL1 PE=2 SV=1;>tr|B4DV72|B4DV72_HUMAN cDNA FLJ54387, moderately similar to SPARC-like protein 1 OS=Homo sapiens PE=2 SV=1;>tr|B4E2Z0|B4E2Z0_HUMAN SPARC-like protein 1 OS=Homo sapiens GN=SPARCL1 PE=2 SV=1;>tr|B7ZB68|B7ZB68_HUMAN cDNA, FLJ…	>sp|Q14515|SPRL1_HUMAN SPARC-like protein 1 OS=Homo sapiens GN=SPARCL1 PE=1 SV=2;>tr|Q8N4S1|Q8N4S1_HUMAN Proliferation-inducing protein 33 OS=Homo sapiens GN=SPARCL1 PE=2 SV=1;>tr|B4DV72|B4DV72_HUMAN cDNA FLJ54387, moderately similar to SPARC-like protein 1 OS=Homo sapiens PE=2 SV=1;>tr|B4E2Z0|B4E2Z0_HUMAN SPARC-like protein 1 OS=Homo sapiens GN=SPARCL1 PE=2 SV=1;>tr|B7ZB68|B7ZB68_HUMAN cDNA, FLJ…	>sp|Q14515|SPRL1_HUMAN SPARC-like protein 1 OS=Homo sapiens GN=SPARCL1 PE=1 SV=2;>tr|Q8N4S1|Q8N4S1_HUMAN Proliferation-inducing protein 33 OS=Homo sapiens GN=SPARCL1 PE=2 SV=1;>tr|B4DV72|B4DV72_HUMAN cDNA FLJ54387, moderately similar to SPARC-like protein	10	3	3	4.5	75.207	0	0	836650	1021200	891560	1039400	0	0	43308000	90485000	60683000	64995000
>tr|B7ZKJ8|B7ZKJ8_HUMAN 35 kDa inter-alpha-trypsin inhibitor heavy chain H4 OS=Homo sapiens GN=ITIH4 PE=2 SV=1;>sp|Q14624|ITIH4_HUMAN Inter-alpha-trypsin inhibitor heavy chain H4 OS=Homo sapiens GN=ITIH4 PE=1 SV=4;>tr|B2RMS9|B2RMS9_HUMAN Inter-alpha (Globulin) inhibitor H4 (Plasma Kallikrein-sensitive glycoprotein) OS=Homo sapiens GN=ITIH4 PE=2 SV=1;>tr|B7Z544|B7Z544_HUMAN cDNA FLJ51742, highly s…	>tr|B7ZKJ8|B7ZKJ8_HUMAN 35 kDa inter-alpha-trypsin inhibitor heavy chain H4 OS=Homo sapiens GN=ITIH4 PE=2 SV=1;>sp|Q14624|ITIH4_HUMAN Inter-alpha-trypsin inhibitor heavy chain H4 OS=Homo sapiens GN=ITIH4 PE=1 SV=4;>tr|B2RMS9|B2RMS9_HUMAN Inter-alpha (Globulin) inhibitor H4 (Plasma Kallikrein-sensitive glycoprotein) OS=Homo sapiens GN=ITIH4 PE=2 SV=1;>tr|B7Z544|B7Z544_HUMAN cDNA FLJ51742, highly s…	>tr|B7ZKJ8|B7ZKJ8_HUMAN 35 kDa inter-alpha-trypsin inhibitor heavy chain H4 OS=Homo sapiens GN=ITIH4 PE=2 SV=1;>sp|Q14624|ITIH4_HUMAN Inter-alpha-trypsin inhibitor heavy chain H4 OS=Homo sapiens GN=ITIH4 PE=1 SV=4;>tr|B2RMS9|B2RMS9_HUMAN Inter-alpha (Globu	11	11	11	14.7	103.88	5316000	18162000	18508000	1187800	274050	962400	559480000	863350000	721870000	197560000	62980000	169240000
>tr|B4DJ30|B4DJ30_HUMAN cDNA FLJ61290, highly similar to Neutral alpha-glucosidase AB OS=Homo sapiens PE=2 SV=1;>sp|Q14697|GANAB_HUMAN Neutral alpha-glucosidase AB OS=Homo sapiens GN=GANAB PE=1 SV=3;>tr|B4DZ53|B4DZ53_HUMAN cDNA FLJ59643, highly similar to Neutral alpha-glucosidase AB OS=Homo sapiens PE=2 SV=1;>tr|E9PKU7|E9PKU7_HUMAN Neutral alpha-glucosidase AB OS=Homo sapiens GN=GANAB PE=4 SV=1;…	>tr|B4DJ30|B4DJ30_HUMAN cDNA FLJ61290, highly similar to Neutral alpha-glucosidase AB OS=Homo sapiens PE=2 SV=1;>sp|Q14697|GANAB_HUMAN Neutral alpha-glucosidase AB OS=Homo sapiens GN=GANAB PE=1 SV=3;>tr|B4DZ53|B4DZ53_HUMAN cDNA FLJ59643, highly similar to Neutral alpha-glucosidase AB OS=Homo sapiens PE=2 SV=1;>tr|E9PKU7|E9PKU7_HUMAN Neutral alpha-glucosidase AB OS=Homo sapiens GN=GANAB PE=4 SV=1;…	>tr|B4DJ30|B4DJ30_HUMAN cDNA FLJ61290, highly similar to Neutral alpha-glucosidase AB OS=Homo sapiens PE=2 SV=1;>sp|Q14697|GANAB_HUMAN Neutral alpha-glucosidase AB OS=Homo sapiens GN=GANAB PE=1 SV=3;>tr|B4DZ53|B4DZ53_HUMAN cDNA FLJ59643, highly similar to	7	1	1	0.9	112.92	0	0	355170	1011000	1048900	1293400	0	0	18828000	69689000	128060000	150610000
>sp|Q15782|CH3L2_HUMAN Chitinase-3-like protein 2 OS=Homo sapiens GN=CHI3L2 PE=1 SV=1;>tr|A6NNY3|A6NNY3_HUMAN Chitinase-3-like protein 2 OS=Homo sapiens GN=CHI3L2 PE=3 SV=1;>tr|Q53FH2|Q53FH2_HUMAN Chitinase 3-like 2 variant (Fragment) OS=Homo sapiens PE=2 SV=1;>tr|H0YE91|H0YE91_HUMAN Chitinase-3-like protein 2 (Fragment) OS=Homo sapiens GN=CHI3L2 PE=3 SV=1;>tr|E9PP75|E9PP75_HUMAN Chitinase-3-like…	>sp|Q15782|CH3L2_HUMAN Chitinase-3-like protein 2 OS=Homo sapiens GN=CHI3L2 PE=1 SV=1;>tr|A6NNY3|A6NNY3_HUMAN Chitinase-3-like protein 2 OS=Homo sapiens GN=CHI3L2 PE=3 SV=1;>tr|Q53FH2|Q53FH2_HUMAN Chitinase 3-like 2 variant (Fragment) OS=Homo sapiens PE=2 SV=1;>tr|H0YE91|H0YE91_HUMAN Chitinase-3-like protein 2 (Fragment) OS=Homo sapiens GN=CHI3L2 PE=3 SV=1;>tr|E9PP75|E9PP75_HUMAN Chitinase-3-like…	>sp|Q15782|CH3L2_HUMAN Chitinase-3-like protein 2 OS=Homo sapiens GN=CHI3L2 PE=1 SV=1;>tr|A6NNY3|A6NNY3_HUMAN Chitinase-3-like protein 2 OS=Homo sapiens GN=CHI3L2 PE=3 SV=1;>tr|Q53FH2|Q53FH2_HUMAN Chitinase 3-like 2 variant (Fragment) OS=Homo sapiens PE=2	11	2	2	5.6	43.5	1951100	0	6260200	6298000	6227000	6978600	119090000	0	70235000	226830000	232030000	237690000
>sp|Q16378|PROL4_HUMAN Proline-rich protein 4 OS=Homo sapiens GN=PRR4 PE=1 SV=3	>sp|Q16378|PROL4_HUMAN Proline-rich protein 4 OS=Homo sapiens GN=PRR4 PE=1 SV=3	>sp|Q16378|PROL4_HUMAN Proline-rich protein 4 OS=Homo sapiens GN=PRR4 PE=1 SV=3	1	6	6	46.3	15.097	3562300000	3418300000	3836400000	8676200000	7223000000	7247700000	22523000000	19895000000	19147000000	121280000000	100010000000	119710000000
>sp|Q6MZM9|CD040_HUMAN Uncharacterized protein C4orf40 OS=Homo sapiens GN=C4orf40 PE=1 SV=1	>sp|Q6MZM9|CD040_HUMAN Uncharacterized protein C4orf40 OS=Homo sapiens GN=C4orf40 PE=1 SV=1	>sp|Q6MZM9|CD040_HUMAN Uncharacterized protein C4orf40 OS=Homo sapiens GN=C4orf40 PE=1 SV=1	1	2	2	11.4	22.72	0	13660000	11953000	19102000	17592000	21849000	0	42470000	23476000	343230000	335390000	378960000
>sp|Q6UXB2|VCC1_HUMAN VEGF co-regulated chemokine 1 OS=Homo sapiens GN=CXCL17 PE=1 SV=1	>sp|Q6UXB2|VCC1_HUMAN VEGF co-regulated chemokine 1 OS=Homo sapiens GN=CXCL17 PE=1 SV=1	>sp|Q6UXB2|VCC1_HUMAN VEGF co-regulated chemokine 1 OS=Homo sapiens GN=CXCL17 PE=1 SV=1	1	3	3	22.7	13.819	0	3199100	3867700	16515000	31601000	27039000	0	71943000	74506000	184030000	184980000	311850000
>sp|Q6ZVX7|NCRP1_HUMAN Non-specific cytotoxic cell receptor protein 1 homolog OS=Homo sapiens GN=NCCRP1 PE=1 SV=1	>sp|Q6ZVX7|NCRP1_HUMAN Non-specific cytotoxic cell receptor protein 1 homolog OS=Homo sapiens GN=NCCRP1 PE=1 SV=1	>sp|Q6ZVX7|NCRP1_HUMAN Non-specific cytotoxic cell receptor protein 1 homolog OS=Homo sapiens GN=NCCRP1 PE=1 SV=1	1	1	1	4	30.847	494140	0	0	0	0	0	5929600	0	0	0	0	0
>tr|G8JLL9|G8JLL9_HUMAN Myosin-14 OS=Homo sapiens GN=MYH14 PE=4 SV=1;>tr|F2Z2U8|F2Z2U8_HUMAN Myosin-14 OS=Homo sapiens GN=MYH14 PE=4 SV=1;>sp|Q7Z406|MYH14_HUMAN Myosin-14 OS=Homo sapiens GN=MYH14 PE=1 SV=2;>tr|B3KWH4|B3KWH4_HUMAN cDNA FLJ43092 fis, clone COLON2002520, highly similar to Myosin-14 (Fragment) OS=Homo sapiens PE=2 SV=1	>tr|G8JLL9|G8JLL9_HUMAN Myosin-14 OS=Homo sapiens GN=MYH14 PE=4 SV=1;>tr|F2Z2U8|F2Z2U8_HUMAN Myosin-14 OS=Homo sapiens GN=MYH14 PE=4 SV=1;>sp|Q7Z406|MYH14_HUMAN Myosin-14 OS=Homo sapiens GN=MYH14 PE=1 SV=2;>tr|B3KWH4|B3KWH4_HUMAN cDNA FLJ43092 fis, clone COLON2002520, highly similar to Myosin-14 (Fragment) OS=Homo sapiens PE=2 SV=1	>tr|G8JLL9|G8JLL9_HUMAN Myosin-14 OS=Homo sapiens GN=MYH14 PE=4 SV=1;>tr|F2Z2U8|F2Z2U8_HUMAN Myosin-14 OS=Homo sapiens GN=MYH14 PE=4 SV=1;>sp|Q7Z406|MYH14_HUMAN Myosin-14 OS=Homo sapiens GN=MYH14 PE=1 SV=2;>tr|B3KWH4|B3KWH4_HUMAN cDNA FLJ43092 fis, clone C	4	1	1	0.4	232.04	168010	152080	174430	0	0	20658	17473000	16713000	17006000	0	0	5064400
>sp|Q8N474|SFRP1_HUMAN Secreted frizzled-related protein 1 OS=Homo sapiens GN=SFRP1 PE=1 SV=1;>tr|A8KAM5|A8KAM5_HUMAN cDNA FLJ77519, highly similar to Homo sapiens secreted frizzled related protein mRNA OS=Homo sapiens PE=2 SV=1;>tr|Q05DS5|Q05DS5_HUMAN SFRP1 protein (Fragment) OS=Homo sapiens GN=SFRP1 PE=2 SV=1;>tr|Q6ZSL4|Q6ZSL4_HUMAN Secreted frizzled-related protein 1 OS=Homo sapiens GN=SFRP1 P…	>sp|Q8N474|SFRP1_HUMAN Secreted frizzled-related protein 1 OS=Homo sapiens GN=SFRP1 PE=1 SV=1;>tr|A8KAM5|A8KAM5_HUMAN cDNA FLJ77519, highly similar to Homo sapiens secreted frizzled related protein mRNA OS=Homo sapiens PE=2 SV=1;>tr|Q05DS5|Q05DS5_HUMAN SFRP1 protein (Fragment) OS=Homo sapiens GN=SFRP1 PE=2 SV=1	>sp|Q8N474|SFRP1_HUMAN Secreted frizzled-related protein 1 OS=Homo sapiens GN=SFRP1 PE=1 SV=1;>tr|A8KAM5|A8KAM5_HUMAN cDNA FLJ77519, highly similar to Homo sapiens secreted frizzled related protein mRNA OS=Homo sapiens PE=2 SV=1;>tr|Q05DS5|Q05DS5_HUMAN SFR	5	5	5	19.7	35.385	18709000	28487000	31508000	58432000	71558000	79002000	236310000	257070000	246000000	2124800000	2372600000	2423200000
>tr|Q5VZE3|Q5VZE3_HUMAN Golgi membrane protein 1 OS=Homo sapiens GN=GOLM1 PE=2 SV=1;>sp|Q8NBJ4|GOLM1_HUMAN Golgi membrane protein 1 OS=Homo sapiens GN=GOLM1 PE=1 SV=1;>tr|B3KNK9|B3KNK9_HUMAN Golgi phosphoprotein 2, isoform CRA_a OS=Homo sapiens GN=GOLPH2 PE=2 SV=1	>tr|Q5VZE3|Q5VZE3_HUMAN Golgi membrane protein 1 OS=Homo sapiens GN=GOLM1 PE=2 SV=1;>sp|Q8NBJ4|GOLM1_HUMAN Golgi membrane protein 1 OS=Homo sapiens GN=GOLM1 PE=1 SV=1;>tr|B3KNK9|B3KNK9_HUMAN Golgi phosphoprotein 2, isoform CRA_a OS=Homo sapiens GN=GOLPH2 PE=2 SV=1	>tr|Q5VZE3|Q5VZE3_HUMAN Golgi membrane protein 1 OS=Homo sapiens GN=GOLM1 PE=2 SV=1;>sp|Q8NBJ4|GOLM1_HUMAN Golgi membrane protein 1 OS=Homo sapiens GN=GOLM1 PE=1 SV=1;>tr|B3KNK9|B3KNK9_HUMAN Golgi phosphoprotein 2, isoform CRA_a OS=Homo sapiens GN=GOLPH2 P	3	1	1	2.9	46.273	0	0	1408400	2149500	999290	1328500	0	0	0	126020000	0	0
>tr|D3DQ70|D3DQ70_HUMAN SERPINE1 mRNA binding protein 1, isoform CRA_d OS=Homo sapiens GN=SERBP1 PE=4 SV=1;>tr|D3DQ69|D3DQ69_HUMAN SERPINE1 mRNA binding protein 1, isoform CRA_c OS=Homo sapiens GN=SERBP1 PE=4 SV=1;>sp|Q8NC51|PAIRB_HUMAN Plasminogen activator inhibitor 1 RNA-binding protein OS=Homo sapiens GN=SERBP1 PE=1 SV=2;>tr|Q5VU21|Q5VU21_HUMAN PAI-1 mRNA-binding protein variant OS=Homo sapie…	>tr|D3DQ70|D3DQ70_HUMAN SERPINE1 mRNA binding protein 1, isoform CRA_d OS=Homo sapiens GN=SERBP1 PE=4 SV=1;>tr|D3DQ69|D3DQ69_HUMAN SERPINE1 mRNA binding protein 1, isoform CRA_c OS=Homo sapiens GN=SERBP1 PE=4 SV=1;>sp|Q8NC51|PAIRB_HUMAN Plasminogen activator inhibitor 1 RNA-binding protein OS=Homo sapiens GN=SERBP1 PE=1 SV=2;>tr|Q5VU21|Q5VU21_HUMAN PAI-1 mRNA-binding protein variant OS=Homo sapie…	>tr|D3DQ70|D3DQ70_HUMAN SERPINE1 mRNA binding protein 1, isoform CRA_d OS=Homo sapiens GN=SERBP1 PE=4 SV=1;>tr|D3DQ69|D3DQ69_HUMAN SERPINE1 mRNA binding protein 1, isoform CRA_c OS=Homo sapiens GN=SERBP1 PE=4 SV=1;>sp|Q8NC51|PAIRB_HUMAN Plasminogen activat	5	1	1	3.4	50.92	0	556890	668500	0	0	0	0	12358000	13160000	0	0	0
>sp|Q8TAX7|MUC7_HUMAN Mucin-7 OS=Homo sapiens GN=MUC7 PE=1 SV=2;>tr|D6RHX1|D6RHX1_HUMAN Mucin-7 (Fragment) OS=Homo sapiens GN=MUC7 PE=4 SV=1	>sp|Q8TAX7|MUC7_HUMAN Mucin-7 OS=Homo sapiens GN=MUC7 PE=1 SV=2;>tr|D6RHX1|D6RHX1_HUMAN Mucin-7 (Fragment) OS=Homo sapiens GN=MUC7 PE=4 SV=1	>sp|Q8TAX7|MUC7_HUMAN Mucin-7 OS=Homo sapiens GN=MUC7 PE=1 SV=2;>tr|D6RHX1|D6RHX1_HUMAN Mucin-7 (Fragment) OS=Homo sapiens GN=MUC7 PE=4 SV=1	2	2	2	5	39.158	12120000	32362000	39242000	2222500	0	0	223770000	317300000	280550000	111270000	0	0
>sp|Q96DA0|ZG16B_HUMAN Zymogen granule protein 16 homolog B OS=Homo sapiens GN=ZG16B PE=1 SV=3;>tr|G8H6I3|G8H6I3_HUMAN Endocrine and exocrine protein OS=Homo sapiens GN=EECP PE=2 SV=1;>tr|C3PTT6|C3PTT6_HUMAN Pancreatic adenocarcinoma upregulated factor OS=Homo sapiens GN=PAUF PE=1 SV=1;>tr|I3L3X0|I3L3X0_HUMAN Zymogen granule protein 16 homolog B (Fragment) OS=Homo sapiens GN=ZG16B PE=4 SV=1;>tr|I…	>sp|Q96DA0|ZG16B_HUMAN Zymogen granule protein 16 homolog B OS=Homo sapiens GN=ZG16B PE=1 SV=3;>tr|G8H6I3|G8H6I3_HUMAN Endocrine and exocrine protein OS=Homo sapiens GN=EECP PE=2 SV=1;>tr|C3PTT6|C3PTT6_HUMAN Pancreatic adenocarcinoma upregulated factor OS=Homo sapiens GN=PAUF PE=1 SV=1	>sp|Q96DA0|ZG16B_HUMAN Zymogen granule protein 16 homolog B OS=Homo sapiens GN=ZG16B PE=1 SV=3;>tr|G8H6I3|G8H6I3_HUMAN Endocrine and exocrine protein OS=Homo sapiens GN=EECP PE=2 SV=1;>tr|C3PTT6|C3PTT6_HUMAN Pancreatic adenocarcinoma upregulated factor OS=	5	4	4	25.5	22.739	82612000	96228000	106770000	205630000	194000000	199780000	863810000	846210000	947350000	5704700000	5520000000	5512000000
>sp|Q96KP4|CNDP2_HUMAN Cytosolic non-specific dipeptidase OS=Homo sapiens GN=CNDP2 PE=1 SV=2;>tr|B4DV28|B4DV28_HUMAN cDNA FLJ54170, highly similar to Cytosolic nonspecific dipeptidase OS=Homo sapiens PE=2 SV=1;>tr|J3QKT2|J3QKT2_HUMAN Cytosolic non-specific dipeptidase (Fragment) OS=Homo sapiens GN=CNDP2 PE=4 SV=1;>tr|B4DPF1|B4DPF1_HUMAN cDNA FLJ56358, highly similar to Cytosolic nonspecific dipep…	>sp|Q96KP4|CNDP2_HUMAN Cytosolic non-specific dipeptidase OS=Homo sapiens GN=CNDP2 PE=1 SV=2;>tr|B4DV28|B4DV28_HUMAN cDNA FLJ54170, highly similar to Cytosolic nonspecific dipeptidase OS=Homo sapiens PE=2 SV=1;>tr|J3QKT2|J3QKT2_HUMAN Cytosolic non-specific dipeptidase (Fragment) OS=Homo sapiens GN=CNDP2 PE=4 SV=1;>tr|B4DPF1|B4DPF1_HUMAN cDNA FLJ56358, highly similar to Cytosolic nonspecific dipep…	>sp|Q96KP4|CNDP2_HUMAN Cytosolic non-specific dipeptidase OS=Homo sapiens GN=CNDP2 PE=1 SV=2;>tr|B4DV28|B4DV28_HUMAN cDNA FLJ54170, highly similar to Cytosolic nonspecific dipeptidase OS=Homo sapiens PE=2 SV=1;>tr|J3QKT2|J3QKT2_HUMAN Cytosolic non-specific	16	2	2	3.8	52.878	826670	1764400	1065400	0	0	0	28885000	26398000	34898000	0	0	0
>tr|I3L0C1|I3L0C1_HUMAN Serine/threonine-protein kinase SMG1 OS=Homo sapiens GN=SMG1 PE=4 SV=1;>sp|Q96Q15|SMG1_HUMAN Serine/threonine-protein kinase SMG1 OS=Homo sapiens GN=SMG1 PE=1 SV=3;>tr|J3KRA9|J3KRA9_HUMAN Serine/threonine-protein kinase SMG1 (Fragment) OS=Homo sapiens GN=SMG1 PE=4 SV=1;>tr|H3BQN7|H3BQN7_HUMAN Serine/threonine-protein kinase SMG1 OS=Homo sapiens GN=SMG1 PE=4 SV=1;>tr|I3L144…	>tr|I3L0C1|I3L0C1_HUMAN Serine/threonine-protein kinase SMG1 OS=Homo sapiens GN=SMG1 PE=4 SV=1;>sp|Q96Q15|SMG1_HUMAN Serine/threonine-protein kinase SMG1 OS=Homo sapiens GN=SMG1 PE=1 SV=3;>tr|J3KRA9|J3KRA9_HUMAN Serine/threonine-protein kinase SMG1 (Fragment) OS=Homo sapiens GN=SMG1 PE=4 SV=1;>tr|H3BQN7|H3BQN7_HUMAN Serine/threonine-protein kinase SMG1 OS=Homo sapiens GN=SMG1 PE=4 SV=1;>tr|I3L144…	>tr|I3L0C1|I3L0C1_HUMAN Serine/threonine-protein kinase SMG1 OS=Homo sapiens GN=SMG1 PE=4 SV=1;>sp|Q96Q15|SMG1_HUMAN Serine/threonine-protein kinase SMG1 OS=Homo sapiens GN=SMG1 PE=1 SV=3;>tr|J3KRA9|J3KRA9_HUMAN Serine/threonine-protein kinase SMG1 (Fragme	5	2	2	0.5	410.62	701420	667090	925620	1134500	889140	434440	223080000	224190000	124540000	410060000	303950000	142870000
>sp|Q96QK1|VPS35_HUMAN Vacuolar protein sorting-associated protein 35 OS=Homo sapiens GN=VPS35 PE=1 SV=2;>tr|Q53FR4|Q53FR4_HUMAN Vacuolar protein sorting 35 variant (Fragment) OS=Homo sapiens PE=2 SV=1;>tr|I3L4P4|I3L4P4_HUMAN Vacuolar protein sorting-associated protein 35 OS=Homo sapiens GN=VPS35 PE=4 SV=1;>tr|I3L4S0|I3L4S0_HUMAN Vacuolar protein sorting-associated protein 35 OS=Homo sapiens GN=V…	>sp|Q96QK1|VPS35_HUMAN Vacuolar protein sorting-associated protein 35 OS=Homo sapiens GN=VPS35 PE=1 SV=2;>tr|Q53FR4|Q53FR4_HUMAN Vacuolar protein sorting 35 variant (Fragment) OS=Homo sapiens PE=2 SV=1;>tr|I3L4P4|I3L4P4_HUMAN Vacuolar protein sorting-associated protein 35 OS=Homo sapiens GN=VPS35 PE=4 SV=1;>tr|I3L4S0|I3L4S0_HUMAN Vacuolar protein sorting-associated protein 35 OS=Homo sapiens GN=V…	>sp|Q96QK1|VPS35_HUMAN Vacuolar protein sorting-associated protein 35 OS=Homo sapiens GN=VPS35 PE=1 SV=2;>tr|Q53FR4|Q53FR4_HUMAN Vacuolar protein sorting 35 variant (Fragment) OS=Homo sapiens PE=2 SV=1;>tr|I3L4P4|I3L4P4_HUMAN Vacuolar protein sorting-assoc	4	1	1	1.6	91.706	144250	120220	156120	12871	0	0	6058500	5335500	6146800	1267700	0	0
>sp|Q99935|PROL1_HUMAN Proline-rich protein 1 OS=Homo sapiens GN=PROL1 PE=1 SV=2	>sp|Q99935|PROL1_HUMAN Proline-rich protein 1 OS=Homo sapiens GN=PROL1 PE=1 SV=2	>sp|Q99935|PROL1_HUMAN Proline-rich protein 1 OS=Homo sapiens GN=PROL1 PE=1 SV=2	1	8	8	25.4	27.216	258040000	277580000	287550000	596690000	701440000	699980000	1961700000	1651800000	1696600000	16742000000	16426000000	17613000000
>sp|Q9GZZ8|LACRT_HUMAN Extracellular glycoprotein lacritin OS=Homo sapiens GN=LACRT PE=1 SV=1;>tr|F8W0V3|F8W0V3_HUMAN Extracellular glycoprotein lacritin OS=Homo sapiens GN=LACRT PE=4 SV=1;>tr|H0YI00|H0YI00_HUMAN Extracellular glycoprotein lacritin (Fragment) OS=Homo sapiens GN=LACRT PE=4 SV=1	>sp|Q9GZZ8|LACRT_HUMAN Extracellular glycoprotein lacritin OS=Homo sapiens GN=LACRT PE=1 SV=1;>tr|F8W0V3|F8W0V3_HUMAN Extracellular glycoprotein lacritin OS=Homo sapiens GN=LACRT PE=4 SV=1	>sp|Q9GZZ8|LACRT_HUMAN Extracellular glycoprotein lacritin OS=Homo sapiens GN=LACRT PE=1 SV=1;>tr|F8W0V3|F8W0V3_HUMAN Extracellular glycoprotein lacritin OS=Homo sapiens GN=LACRT PE=4 SV=1	3	5	5	34.8	14.246	9040500000	13304000000	14579000000	19574000000	18463000000	18896000000	55541000000	55911000000	55667000000	176680000000	175860000000	175170000000
>sp|Q9H0D2|ZN541_HUMAN Zinc finger protein 541 OS=Homo sapiens GN=ZNF541 PE=1 SV=2;>tr|H7BXG6|H7BXG6_HUMAN Zinc finger protein 541 (Fragment) OS=Homo sapiens GN=ZNF541 PE=4 SV=1	>sp|Q9H0D2|ZN541_HUMAN Zinc finger protein 541 OS=Homo sapiens GN=ZNF541 PE=1 SV=2;>tr|H7BXG6|H7BXG6_HUMAN Zinc finger protein 541 (Fragment) OS=Homo sapiens GN=ZNF541 PE=4 SV=1	>sp|Q9H0D2|ZN541_HUMAN Zinc finger protein 541 OS=Homo sapiens GN=ZNF541 PE=1 SV=2;>tr|H7BXG6|H7BXG6_HUMAN Zinc finger protein 541 (Fragment) OS=Homo sapiens GN=ZNF541 PE=4 SV=1	2	1	1	0.5	147.81	29187000	0	0	0	0	0	1868000000	0	0	0	0	0
>sp|Q9H4A4|AMPB_HUMAN Aminopeptidase B OS=Homo sapiens GN=RNPEP PE=1 SV=2;>tr|A6NKB8|A6NKB8_HUMAN Aminopeptidase B OS=Homo sapiens GN=RNPEP PE=4 SV=1	>sp|Q9H4A4|AMPB_HUMAN Aminopeptidase B OS=Homo sapiens GN=RNPEP PE=1 SV=2;>tr|A6NKB8|A6NKB8_HUMAN Aminopeptidase B OS=Homo sapiens GN=RNPEP PE=4 SV=1	>sp|Q9H4A4|AMPB_HUMAN Aminopeptidase B OS=Homo sapiens GN=RNPEP PE=1 SV=2;>tr|A6NKB8|A6NKB8_HUMAN Aminopeptidase B OS=Homo sapiens GN=RNPEP PE=4 SV=1	2	1	1	2	72.595	0	601630	573730	57606	0	64310	0	16894000	15112000	6015900	0	6496200
>sp|Q9H4A6|GOLP3_HUMAN Golgi phosphoprotein 3 OS=Homo sapiens GN=GOLPH3 PE=1 SV=1;>tr|D6REM1|D6REM1_HUMAN Golgi phosphoprotein 3 OS=Homo sapiens GN=GOLPH3 PE=4 SV=1	>sp|Q9H4A6|GOLP3_HUMAN Golgi phosphoprotein 3 OS=Homo sapiens GN=GOLPH3 PE=1 SV=1;>tr|D6REM1|D6REM1_HUMAN Golgi phosphoprotein 3 OS=Homo sapiens GN=GOLPH3 PE=4 SV=1	>sp|Q9H4A6|GOLP3_HUMAN Golgi phosphoprotein 3 OS=Homo sapiens GN=GOLPH3 PE=1 SV=1;>tr|D6REM1|D6REM1_HUMAN Golgi phosphoprotein 3 OS=Homo sapiens GN=GOLPH3 PE=4 SV=1	2	1	1	5.4	33.81	119800	105050	173540	0	0	0	1916700	1776200	2602900	0	0	0
>sp|Q9NRJ3|CCL28_HUMAN C-C motif chemokine 28 OS=Homo sapiens GN=CCL28 PE=1 SV=1;>tr|A0N0Q3|A0N0Q3_HUMAN Chemokine (C-C motif) ligand 28 OS=Homo sapiens GN=CCL28 PE=2 SV=1;>tr|D6RC73|D6RC73_HUMAN C-C motif chemokine 28 OS=Homo sapiens GN=CCL28 PE=4 SV=1	>sp|Q9NRJ3|CCL28_HUMAN C-C motif chemokine 28 OS=Homo sapiens GN=CCL28 PE=1 SV=1;>tr|A0N0Q3|A0N0Q3_HUMAN Chemokine (C-C motif) ligand 28 OS=Homo sapiens GN=CCL28 PE=2 SV=1;>tr|D6RC73|D6RC73_HUMAN C-C motif chemokine 28 OS=Homo sapiens GN=CCL28 PE=4 SV=1	>sp|Q9NRJ3|CCL28_HUMAN C-C motif chemokine 28 OS=Homo sapiens GN=CCL28 PE=1 SV=1;>tr|A0N0Q3|A0N0Q3_HUMAN Chemokine (C-C motif) ligand 28 OS=Homo sapiens GN=CCL28 PE=2 SV=1;>tr|D6RC73|D6RC73_HUMAN C-C motif chemokine 28 OS=Homo sapiens GN=CCL28 PE=4 SV=1	3	1	1	8.7	14.279	0	2100300	3410600	6856100	7238200	0	0	5627700	7400100	52878000	58829000	0
>sp|Q9UGM3|DMBT1_HUMAN Deleted in malignant brain tumors 1 protein OS=Homo sapiens GN=DMBT1 PE=1 SV=2;>tr|B7Z8Y2|B7Z8Y2_HUMAN cDNA FLJ61619, highly similar to Deleted in malignant brain tumors 1 protein OS=Homo sapiens PE=2 SV=1;>tr|F8WEF7|F8WEF7_HUMAN Deleted in malignant brain tumors 1 protein OS=Homo sapiens GN=DMBT1 PE=4 SV=1;>tr|B6V682|B6V682_HUMAN Deleted in malignant brain tumors 1 (Fragme…	>sp|Q9UGM3|DMBT1_HUMAN Deleted in malignant brain tumors 1 protein OS=Homo sapiens GN=DMBT1 PE=1 SV=2;>tr|B7Z8Y2|B7Z8Y2_HUMAN cDNA FLJ61619, highly similar to Deleted in malignant brain tumors 1 protein OS=Homo sapiens PE=2 SV=1;>tr|F8WEF7|F8WEF7_HUMAN Deleted in malignant brain tumors 1 protein OS=Homo sapiens GN=DMBT1 PE=4 SV=1	>sp|Q9UGM3|DMBT1_HUMAN Deleted in malignant brain tumors 1 protein OS=Homo sapiens GN=DMBT1 PE=1 SV=2;>tr|B7Z8Y2|B7Z8Y2_HUMAN cDNA FLJ61619, highly similar to Deleted in malignant brain tumors 1 protein OS=Homo sapiens PE=2 SV=1;>tr|F8WEF7|F8WEF7_HUMAN Del	5	22	22	37.6	260.73	57284000	61429000	62670000	85685000	80031000	85245000	4724900000	4774200000	4420800000	17541000000	17538000000	16202000000
>sp|Q9Y490|TLN1_HUMAN Talin-1 OS=Homo sapiens GN=TLN1 PE=1 SV=3;>tr|Q5TCU6|Q5TCU6_HUMAN Talin 1 OS=Homo sapiens GN=TLN1 PE=2 SV=1	>sp|Q9Y490|TLN1_HUMAN Talin-1 OS=Homo sapiens GN=TLN1 PE=1 SV=3;>tr|Q5TCU6|Q5TCU6_HUMAN Talin 1 OS=Homo sapiens GN=TLN1 PE=2 SV=1	>sp|Q9Y490|TLN1_HUMAN Talin-1 OS=Homo sapiens GN=TLN1 PE=1 SV=3;>tr|Q5TCU6|Q5TCU6_HUMAN Talin 1 OS=Homo sapiens GN=TLN1 PE=2 SV=1	2	2	2	1.7	269.76	106300	110880	103350	5136.4	3412.9	7192.6	12750000	13758000	11215000	3063400	2344900	3958700
>tr|Q6P5V6|Q6P5V6_HUMAN SNX5 protein (Fragment) OS=Homo sapiens GN=SNX5 PE=2 SV=1;>sp|Q9Y5X3|SNX5_HUMAN Sorting nexin-5 OS=Homo sapiens GN=SNX5 PE=1 SV=1;>tr|Q53FH8|Q53FH8_HUMAN Sorting nexin 5 variant (Fragment) OS=Homo sapiens PE=2 SV=1;>tr|B7Z476|B7Z476_HUMAN cDNA FLJ55170, highly similar to Sorting nexin-5 OS=Homo sapiens PE=2 SV=1	>tr|Q6P5V6|Q6P5V6_HUMAN SNX5 protein (Fragment) OS=Homo sapiens GN=SNX5 PE=2 SV=1;>sp|Q9Y5X3|SNX5_HUMAN Sorting nexin-5 OS=Homo sapiens GN=SNX5 PE=1 SV=1;>tr|Q53FH8|Q53FH8_HUMAN Sorting nexin 5 variant (Fragment) OS=Homo sapiens PE=2 SV=1;>tr|B7Z476|B7Z476_HUMAN cDNA FLJ55170, highly similar to Sorting nexin-5 OS=Homo sapiens PE=2 SV=1	>tr|Q6P5V6|Q6P5V6_HUMAN SNX5 protein (Fragment) OS=Homo sapiens GN=SNX5 PE=2 SV=1;>sp|Q9Y5X3|SNX5_HUMAN Sorting nexin-5 OS=Homo sapiens GN=SNX5 PE=1 SV=1;>tr|Q53FH8|Q53FH8_HUMAN Sorting nexin 5 variant (Fragment) OS=Homo sapiens PE=2 SV=1;>tr|B7Z476|B7Z476	4	1	1	2.9	47.438	192890	141540	217290	14676	15017	22848	5124300	3973500	5411400	659270	697610	922400
>tr|A0N5G5|A0N5G5_HUMAN Rheumatoid factor D5 light chain (Fragment) OS=Homo sapiens GN=V<kappa>3 PE=2 SV=1;>sp|P04433|KV309_HUMAN Ig kappa chain V-III region VG (Fragment) OS=Homo sapiens PE=1 SV=1;>tr|B1N7B8|B1N7B8_HUMAN Cryocrystalglobulin CC1 kappa light chain variable region (Fragment) OS=Homo sapiens PE=2 SV=1;>tr|H7C1X1|H7C1X1_HUMAN Uncharacterized protein OS=Homo sapiens PE=4 SV=1;>sp|P042…	>tr|A0N5G5|A0N5G5_HUMAN Rheumatoid factor D5 light chain (Fragment) OS=Homo sapiens GN=V<kappa>3 PE=2 SV=1;>sp|P04433|KV309_HUMAN Ig kappa chain V-III region VG (Fragment) OS=Homo sapiens PE=1 SV=1;>tr|B1N7B8|B1N7B8_HUMAN Cryocrystalglobulin CC1 kappa light chain variable region (Fragment) OS=Homo sapiens PE=2 SV=1	>tr|A0N5G5|A0N5G5_HUMAN Rheumatoid factor D5 light chain (Fragment) OS=Homo sapiens GN=V<kappa>3 PE=2 SV=1;>sp|P04433|KV309_HUMAN Ig kappa chain V-III region VG (Fragment) OS=Homo sapiens PE=1 SV=1;>tr|B1N7B8|B1N7B8_HUMAN Cryocrystalglobulin CC1 kappa ligh	6	3	2	28.8	12.766	148560000	147410000	147710000	55369000	51343000	51924000	901040000	977980000	790100000	999980000	1064400000	934510000
>tr|Q4LE82|Q4LE82_HUMAN C4A variant protein (Fragment) OS=Homo sapiens GN=C4A variant protein PE=2 SV=1;>tr|A2BHY4|A2BHY4_HUMAN Complement component C4B (Childo blood group) OS=Homo sapiens GN=C4B-1 PE=4 SV=1;>tr|A7E2V2|A7E2V2_HUMAN Complement component 4A (Rodgers blood group) OS=Homo sapiens GN=C4A PE=2 SV=1;>tr|B0UZ83|B0UZ83_HUMAN Complement C4 beta chain OS=Homo sapiens GN=C4A PE=4 SV=1;>tr|B…	>tr|Q4LE82|Q4LE82_HUMAN C4A variant protein (Fragment) OS=Homo sapiens GN=C4A variant protein PE=2 SV=1;>tr|A2BHY4|A2BHY4_HUMAN Complement component C4B (Childo blood group) OS=Homo sapiens GN=C4B-1 PE=4 SV=1;>tr|A7E2V2|A7E2V2_HUMAN Complement component 4A (Rodgers blood group) OS=Homo sapiens GN=C4A PE=2 SV=1;>tr|B0UZ83|B0UZ83_HUMAN Complement C4 beta chain OS=Homo sapiens GN=C4A PE=4 SV=1;>tr|B…	>tr|Q4LE82|Q4LE82_HUMAN C4A variant protein (Fragment) OS=Homo sapiens GN=C4A variant protein PE=2 SV=1;>tr|A2BHY4|A2BHY4_HUMAN Complement component C4B (Childo blood group) OS=Homo sapiens GN=C4B-1 PE=4 SV=1;>tr|A7E2V2|A7E2V2_HUMAN Complement component 4A	50	33	33	23.4	193.44	17974000	21865000	26945000	1115700	1306400	926130	1900300000	1811000000	1723700000	265940000	367500000	194040000
>tr|Q9UL95|Q9UL95_HUMAN Myosin-reactive immunoglobulin heavy chain variable region (Fragment) OS=Homo sapiens PE=2 SV=1;>tr|Q9UL94|Q9UL94_HUMAN Myosin-reactive immunoglobulin heavy chain variable region (Fragment) OS=Homo sapiens PE=2 SV=1;>tr|A2J1M4|A2J1M4_HUMAN Rheumatoid factor RF-ET7 (Fragment) OS=Homo sapiens PE=2 SV=1;>tr|Q65ZC8|Q65ZC8_HUMAN Single-chain Fv (Fragment) OS=Homo sapiens GN=scF…	>tr|Q9UL95|Q9UL95_HUMAN Myosin-reactive immunoglobulin heavy chain variable region (Fragment) OS=Homo sapiens PE=2 SV=1;>tr|Q9UL94|Q9UL94_HUMAN Myosin-reactive immunoglobulin heavy chain variable region (Fragment) OS=Homo sapiens PE=2 SV=1;>tr|A2J1M4|A2J1M4_HUMAN Rheumatoid factor RF-ET7 (Fragment) OS=Homo sapiens PE=2 SV=1;>tr|Q65ZC8|Q65ZC8_HUMAN Single-chain Fv (Fragment) OS=Homo sapiens GN=scF…	>tr|Q9UL95|Q9UL95_HUMAN Myosin-reactive immunoglobulin heavy chain variable region (Fragment) OS=Homo sapiens PE=2 SV=1;>tr|Q9UL94|Q9UL94_HUMAN Myosin-reactive immunoglobulin heavy chain variable region (Fragment) OS=Homo sapiens PE=2 SV=1;>tr|A2J1M4|A2J1M	4	2	1	14.4	13.516	0	0	0	16614000	14745000	0	0	0	0	233780000	218640000	0
>tr|A2J1M8|A2J1M8_HUMAN Rheumatoid factor RF-IP12 (Fragment) OS=Homo sapiens PE=2 SV=1	>tr|A2J1M8|A2J1M8_HUMAN Rheumatoid factor RF-IP12 (Fragment) OS=Homo sapiens PE=2 SV=1	>tr|A2J1M8|A2J1M8_HUMAN Rheumatoid factor RF-IP12 (Fragment) OS=Homo sapiens PE=2 SV=1	1	1	1	13.7	10.685	7855700	9550500	9291400	0	0	0	54990000	70645000	60972000	0	0	0
>tr|A2J1N6|A2J1N6_HUMAN Rheumatoid factor RF-ET9 (Fragment) OS=Homo sapiens PE=2 SV=1	>tr|A2J1N6|A2J1N6_HUMAN Rheumatoid factor RF-ET9 (Fragment) OS=Homo sapiens PE=2 SV=1	>tr|A2J1N6|A2J1N6_HUMAN Rheumatoid factor RF-ET9 (Fragment) OS=Homo sapiens PE=2 SV=1	1	3	1	29.6	12.626	7269600	6920900	6691100	3111100	5322700	3286200	49799000	53814000	47961000	53718000	83580000	56185000
>tr|A2KBB9|A2KBB9_HUMAN Anti-(ED-B) scFV (Fragment) OS=Homo sapiens PE=2 SV=1;>tr|A2KBC0|A2KBC0_HUMAN Anti-(ED-B) scFV (Fragment) OS=Homo sapiens PE=2 SV=1;>tr|A2KBC2|A2KBC2_HUMAN Anti-(ED-B) scFV (Fragment) OS=Homo sapiens PE=2 SV=1;>tr|A2KBC3|A2KBC3_HUMAN Anti-(ED-B) scFV (Fragment) OS=Homo sapiens PE=2 SV=1;>tr|A2KBC4|A2KBC4_HUMAN Anti-TN-C scFv (Fragment) OS=Homo sapiens PE=2 SV=1;>tr|A2KBC5|…	>tr|A2KBB9|A2KBB9_HUMAN Anti-(ED-B) scFV (Fragment) OS=Homo sapiens PE=2 SV=1;>tr|A2KBC0|A2KBC0_HUMAN Anti-(ED-B) scFV (Fragment) OS=Homo sapiens PE=2 SV=1;>tr|A2KBC2|A2KBC2_HUMAN Anti-(ED-B) scFV (Fragment) OS=Homo sapiens PE=2 SV=1;>tr|A2KBC3|A2KBC3_HUMAN Anti-(ED-B) scFV (Fragment) OS=Homo sapiens PE=2 SV=1;>tr|A2KBC4|A2KBC4_HUMAN Anti-TN-C scFv (Fragment) OS=Homo sapiens PE=2 SV=1;>tr|A2KBC5|…	>tr|A2KBB9|A2KBB9_HUMAN Anti-(ED-B) scFV (Fragment) OS=Homo sapiens PE=2 SV=1;>tr|A2KBC0|A2KBC0_HUMAN Anti-(ED-B) scFV (Fragment) OS=Homo sapiens PE=2 SV=1;>tr|A2KBC2|A2KBC2_HUMAN Anti-(ED-B) scFV (Fragment) OS=Homo sapiens PE=2 SV=1;>tr|A2KBC3|A2KBC3_HUMA	36	5	0	26.1	25.145	13684000	58987000	66872000	28493000	28230000	29045000	497310000	793820000	601700000	586390000	609300000	644840000
>tr|A2KUC4|A2KUC4_HUMAN UGa8L (Fragment) OS=Homo sapiens GN=IGLV PE=4 SV=1;>tr|Q5NV88|Q5NV88_HUMAN V1-22 protein (Fragment) OS=Homo sapiens GN=V1-22 PE=4 SV=1	>tr|A2KUC4|A2KUC4_HUMAN UGa8L (Fragment) OS=Homo sapiens GN=IGLV PE=4 SV=1;>tr|Q5NV88|Q5NV88_HUMAN V1-22 protein (Fragment) OS=Homo sapiens GN=V1-22 PE=4 SV=1	>tr|A2KUC4|A2KUC4_HUMAN UGa8L (Fragment) OS=Homo sapiens GN=IGLV PE=4 SV=1;>tr|Q5NV88|Q5NV88_HUMAN V1-22 protein (Fragment) OS=Homo sapiens GN=V1-22 PE=4 SV=1	2	3	1	14.3	12.205	0	13378000	16328000	7810700	7257900	8615500	0	112570000	121880000	148370000	145800000	161700000
>tr|A2MYD4|A2MYD4_HUMAN V2-7 protein (Fragment) OS=Homo sapiens GN=V2-7 PE=4 SV=1;>sp|P01717|LV403_HUMAN Ig lambda chain V-IV region Hil OS=Homo sapiens PE=1 SV=1	>tr|A2MYD4|A2MYD4_HUMAN V2-7 protein (Fragment) OS=Homo sapiens GN=V2-7 PE=4 SV=1	>tr|A2MYD4|A2MYD4_HUMAN V2-7 protein (Fragment) OS=Homo sapiens GN=V2-7 PE=4 SV=1	2	4	0	38.5	10.352	35710000	37150000	48039000	10733000	13041000	15487000	151290000	168510000	194880000	172560000	220930000	250260000
>tr|Q9UL77|Q9UL77_HUMAN Myosin-reactive immunoglobulin light chain variable region (Fragment) OS=Homo sapiens PE=1 SV=1;>tr|Q96SA9|Q96SA9_HUMAN Anti-streptococcal/anti-myosin immunoglobulin kappa light chain variable region (Fragment) OS=Homo sapiens PE=2 SV=1;>tr|Q9UL81|Q9UL81_HUMAN Myosin-reactive immunoglobulin light chain variable region (Fragment) OS=Homo sapiens PE=2 SV=1;>tr|A2MYE1|A2MYE1_…	>tr|Q9UL77|Q9UL77_HUMAN Myosin-reactive immunoglobulin light chain variable region (Fragment) OS=Homo sapiens PE=1 SV=1;>tr|Q96SA9|Q96SA9_HUMAN Anti-streptococcal/anti-myosin immunoglobulin kappa light chain variable region (Fragment) OS=Homo sapiens PE=2 SV=1;>tr|Q9UL81|Q9UL81_HUMAN Myosin-reactive immunoglobulin light chain variable region (Fragment) OS=Homo sapiens PE=2 SV=1;>tr|A2MYE1|A2MYE1_…	>tr|Q9UL77|Q9UL77_HUMAN Myosin-reactive immunoglobulin light chain variable region (Fragment) OS=Homo sapiens PE=1 SV=1;>tr|Q96SA9|Q96SA9_HUMAN Anti-streptococcal/anti-myosin immunoglobulin kappa light chain variable region (Fragment) OS=Homo sapiens PE=2	17	2	2	30.6	11.738	190360000	167930000	221630000	82736000	73659000	81131000	560120000	508400000	611150000	590190000	553710000	581710000
>tr|A2NJV5|A2NJV5_HUMAN Kappa light chain variable region (Fragment) OS=Homo sapiens GN=IGKV A18 PE=4 SV=1;>sp|P06310|KV206_HUMAN Ig kappa chain V-II region RPMI 6410 OS=Homo sapiens PE=4 SV=1;>tr|Q9UL80|Q9UL80_HUMAN Myosin-reactive immunoglobulin light chain variable region (Fragment) OS=Homo sapiens PE=2 SV=1;>tr|Q7Z3Y5|Q7Z3Y5_HUMAN Rearranged VKA17 V gene segment (Fragment) OS=Homo sapiens GN=…	>tr|A2NJV5|A2NJV5_HUMAN Kappa light chain variable region (Fragment) OS=Homo sapiens GN=IGKV A18 PE=4 SV=1	>tr|A2NJV5|A2NJV5_HUMAN Kappa light chain variable region (Fragment) OS=Homo sapiens GN=IGKV A18 PE=4 SV=1	4	3	2	25.6	13.182	32288000	31163000	32000000	20428000	21949000	20858000	184720000	178670000	171670000	341460000	283950000	263860000
>tr|A2NUT2|A2NUT2_HUMAN Lambda-chain (AA -20 to 215) OS=Homo sapiens PE=2 SV=1;>sp|P06316|LV107_HUMAN Ig lambda chain V-I region BL2 OS=Homo sapiens PE=2 SV=1;>tr|A2NV54|A2NV54_HUMAN Precursor (AA -19 to 108) (Fragment) OS=Homo sapiens PE=2 SV=1;>sp|P01702|LV104_HUMAN Ig lambda chain V-I region NIG-64 OS=Homo sapiens PE=1 SV=1;>tr|A2NYV2|A2NYV2_HUMAN Light chain Fab (Fragment) OS=Homo sapiens PE=…	>tr|A2NUT2|A2NUT2_HUMAN Lambda-chain (AA -20 to 215) OS=Homo sapiens PE=2 SV=1	>tr|A2NUT2|A2NUT2_HUMAN Lambda-chain (AA -20 to 215) OS=Homo sapiens PE=2 SV=1	9	11	0	50.2	24.654	16035000	70140000	89785000	33374000	29446000	32735000	558880000	655540000	742160000	905570000	852220000	918650000
>tr|A8K008|A8K008_HUMAN cDNA FLJ78387 OS=Homo sapiens PE=2 SV=1;>tr|Q5EFE5|Q5EFE5_HUMAN Anti-RhD monoclonal T125 gamma1 heavy chain OS=Homo sapiens PE=2 SV=1;>sp|P01857|IGHG1_HUMAN Ig gamma-1 chain C region OS=Homo sapiens GN=IGHG1 PE=1 SV=1;>tr|A2N2G5|A2N2G5_HUMAN VH87-2 protein (Fragment) OS=Homo sapiens GN=VH87-2 PE=2 SV=1;>tr|Q0ZCJ6|Q0ZCJ6_HUMAN Immunglobulin heavy chain variable region (Frag…	>tr|A8K008|A8K008_HUMAN cDNA FLJ78387 OS=Homo sapiens PE=2 SV=1;>tr|Q5EFE5|Q5EFE5_HUMAN Anti-RhD monoclonal T125 gamma1 heavy chain OS=Homo sapiens PE=2 SV=1;>sp|P01857|IGHG1_HUMAN Ig gamma-1 chain C region OS=Homo sapiens GN=IGHG1 PE=1 SV=1	>tr|A8K008|A8K008_HUMAN cDNA FLJ78387 OS=Homo sapiens PE=2 SV=1;>tr|Q5EFE5|Q5EFE5_HUMAN Anti-RhD monoclonal T125 gamma1 heavy chain OS=Homo sapiens PE=2 SV=1;>sp|P01857|IGHG1_HUMAN Ig gamma-1 chain C region OS=Homo sapiens GN=IGHG1 PE=1 SV=1	9	16	0	42.4	51.596	2861900	4863400	4320300	3518500	3119400	3036700	84717000	108460000	84096000	172530000	155810000	146830000
>tr|B1N7B9|B1N7B9_HUMAN Cryocrystalglobulin CC2 lambda light chain variable region (Fragment) OS=Homo sapiens PE=2 SV=1;>tr|Q8IZD8|Q8IZD8_HUMAN Anti-thyroglobulin light chain variable region (Fragment) OS=Homo sapiens PE=2 SV=1	>tr|B1N7B9|B1N7B9_HUMAN Cryocrystalglobulin CC2 lambda light chain variable region (Fragment) OS=Homo sapiens PE=2 SV=1;>tr|Q8IZD8|Q8IZD8_HUMAN Anti-thyroglobulin light chain variable region (Fragment) OS=Homo sapiens PE=2 SV=1	>tr|B1N7B9|B1N7B9_HUMAN Cryocrystalglobulin CC2 lambda light chain variable region (Fragment) OS=Homo sapiens PE=2 SV=1;>tr|Q8IZD8|Q8IZD8_HUMAN Anti-thyroglobulin light chain variable region (Fragment) OS=Homo sapiens PE=2 SV=1	2	3	1	20	11.314	8203300	7355700	7205000	0	0	0	42067000	35955000	34637000	0	0	0
>tr|B2MV13|B2MV13_HUMAN Lactoferrin OS=Homo sapiens GN=LTF PE=4 SV=1;>tr|B7ZAL5|B7ZAL5_HUMAN cDNA, FLJ79229, highly similar to Lactotransferrin (EC 3.4.21.-) OS=Homo sapiens PE=2 SV=1;>tr|B2MV14|B2MV14_HUMAN Truncated lactoferrin OS=Homo sapiens GN=LTF PE=4 SV=1;>tr|C9J0S5|C9J0S5_HUMAN Kaliocin-1 (Fragment) OS=Homo sapiens GN=LTF PE=4 SV=1	>tr|B2MV13|B2MV13_HUMAN Lactoferrin OS=Homo sapiens GN=LTF PE=4 SV=1;>tr|B7ZAL5|B7ZAL5_HUMAN cDNA, FLJ79229, highly similar to Lactotransferrin (EC 3.4.21.-) OS=Homo sapiens PE=2 SV=1;>tr|B2MV14|B2MV14_HUMAN Truncated lactoferrin OS=Homo sapiens GN=LTF PE=4 SV=1	>tr|B2MV13|B2MV13_HUMAN Lactoferrin OS=Homo sapiens GN=LTF PE=4 SV=1;>tr|B7ZAL5|B7ZAL5_HUMAN cDNA, FLJ79229, highly similar to Lactotransferrin (EC 3.4.21.-) OS=Homo sapiens PE=2 SV=1;>tr|B2MV14|B2MV14_HUMAN Truncated lactoferrin OS=Homo sapiens GN=LTF PE=	4	63	1	81.7	78.395	88574000	93513000	112460000	136310000	2991500	125030000	4163000000	4644400000	4955100000	15025000000	347470000	13852000000
>tr|B2R564|B2R564_HUMAN Submaxillary gland androgen regulated protein 3 homolog A (Mouse) OS=Homo sapiens GN=SMR3A PE=2 SV=1;>sp|Q99954|SMR3A_HUMAN Submaxillary gland androgen-regulated protein 3A OS=Homo sapiens GN=SMR3A PE=2 SV=2	>tr|B2R564|B2R564_HUMAN Submaxillary gland androgen regulated protein 3 homolog A (Mouse) OS=Homo sapiens GN=SMR3A PE=2 SV=1;>sp|Q99954|SMR3A_HUMAN Submaxillary gland androgen-regulated protein 3A OS=Homo sapiens GN=SMR3A PE=2 SV=2	>tr|B2R564|B2R564_HUMAN Submaxillary gland androgen regulated protein 3 homolog A (Mouse) OS=Homo sapiens GN=SMR3A PE=2 SV=1;>sp|Q99954|SMR3A_HUMAN Submaxillary gland androgen-regulated protein 3A OS=Homo sapiens GN=SMR3A PE=2 SV=2	2	3	3	35.8	14.117	100420000	124620000	119690000	216670000	199710000	208010000	701840000	829930000	710610000	3579600000	3640100000	3728700000
>tr|Q59EF6|Q59EF6_HUMAN Calpain 2, large [catalytic] subunit variant (Fragment) OS=Homo sapiens PE=2 SV=1;>tr|B2RCM3|B2RCM3_HUMAN cDNA, FLJ96158, highly similar to Homo sapiens calpain 2, (m/II) large subunit (CAPN2), mRNA OS=Homo sapiens PE=2 SV=1;>tr|B4E1R7|B4E1R7_HUMAN cDNA FLJ58224, highly similar to Calpain-2 catalytic subunit (EC 3.4.22.53) OS=Homo sapiens PE=2 SV=1	>tr|Q59EF6|Q59EF6_HUMAN Calpain 2, large [catalytic] subunit variant (Fragment) OS=Homo sapiens PE=2 SV=1;>tr|B2RCM3|B2RCM3_HUMAN cDNA, FLJ96158, highly similar to Homo sapiens calpain 2, (m/II) large subunit (CAPN2), mRNA OS=Homo sapiens PE=2 SV=1;>tr|B4E1R7|B4E1R7_HUMAN cDNA FLJ58224, highly similar to Calpain-2 catalytic subunit (EC 3.4.22.53) OS=Homo sapiens PE=2 SV=1	>tr|Q59EF6|Q59EF6_HUMAN Calpain 2, large [catalytic] subunit variant (Fragment) OS=Homo sapiens PE=2 SV=1;>tr|B2RCM3|B2RCM3_HUMAN cDNA, FLJ96158, highly similar to Homo sapiens calpain 2, (m/II) large subunit (CAPN2), mRNA OS=Homo sapiens PE=2 SV=1;>tr|B4E	3	2	2	1.8	83.108	689170	560590	1519700	0	0	0	52376000	27620000	42365000	0	0	0
>tr|B3KSL2|B3KSL2_HUMAN cDNA FLJ36533 fis, clone TRACH2004428, highly similar to Lactotransferrin (EC 3.4.21.-) (Fragment) OS=Homo sapiens PE=2 SV=1;>tr|Q19KS2|Q19KS2_HUMAN Lactoferrin (Fragment) OS=Homo sapiens PE=2 SV=1;>tr|Q8IX02|Q8IX02_HUMAN Lactoferrin (Fragment) OS=Homo sapiens PE=2 SV=1;>tr|C9JCF5|C9JCF5_HUMAN Kaliocin-1 (Fragment) OS=Homo sapiens GN=LTF PE=4 SV=1;>tr|B4E1L2|B4E1L2_HUMAN c…	>tr|B3KSL2|B3KSL2_HUMAN cDNA FLJ36533 fis, clone TRACH2004428, highly similar to Lactotransferrin (EC 3.4.21.-) (Fragment) OS=Homo sapiens PE=2 SV=1;>tr|Q19KS2|Q19KS2_HUMAN Lactoferrin (Fragment) OS=Homo sapiens PE=2 SV=1	>tr|B3KSL2|B3KSL2_HUMAN cDNA FLJ36533 fis, clone TRACH2004428, highly similar to Lactotransferrin (EC 3.4.21.-) (Fragment) OS=Homo sapiens PE=2 SV=1;>tr|Q19KS2|Q19KS2_HUMAN Lactoferrin (Fragment) OS=Homo sapiens PE=2 SV=1	5	62	0	82.1	76.752	60777000	54651000	60932000	98716000	97132000	95754000	2856500000	2714300000	2684700000	10881000000	11282000000	10609000000
>tr|B4DZX4|B4DZX4_HUMAN cDNA FLJ51420, highly similar to Aflatoxin B1 aldehyde reductase member 2 (EC 1.-.-.-) OS=Homo sapiens PE=2 SV=1	>tr|B4DZX4|B4DZX4_HUMAN cDNA FLJ51420, highly similar to Aflatoxin B1 aldehyde reductase member 2 (EC 1.-.-.-) OS=Homo sapiens PE=2 SV=1	>tr|B4DZX4|B4DZX4_HUMAN cDNA FLJ51420, highly similar to Aflatoxin B1 aldehyde reductase member 2 (EC 1.-.-.-) OS=Homo sapiens PE=2 SV=1	1	1	1	4.2	18.256	2345400	2166200	2586800	0	0	0	20047000	19566000	20727000	0	0	0
>tr|B4E1B2|B4E1B2_HUMAN cDNA FLJ53691, highly similar to Serotransferrin OS=Homo sapiens PE=2 SV=1	>tr|B4E1B2|B4E1B2_HUMAN cDNA FLJ53691, highly similar to Serotransferrin OS=Homo sapiens PE=2 SV=1	>tr|B4E1B2|B4E1B2_HUMAN cDNA FLJ53691, highly similar to Serotransferrin OS=Homo sapiens PE=2 SV=1	1	45	1	68.7	74.831	13253000	12332000	15549000	1937000	1624000	1650700	530130000	521270000	583050000	181700000	160540000	155650000
>tr|B4E1V0|B4E1V0_HUMAN cDNA FLJ54839, highly similar to Lactotransferrin (EC 3.4.21.-) OS=Homo sapiens PE=2 SV=1	>tr|B4E1V0|B4E1V0_HUMAN cDNA FLJ54839, highly similar to Lactotransferrin (EC 3.4.21.-) OS=Homo sapiens PE=2 SV=1	>tr|B4E1V0|B4E1V0_HUMAN cDNA FLJ54839, highly similar to Lactotransferrin (EC 3.4.21.-) OS=Homo sapiens PE=2 SV=1	1	25	1	79.7	33.025	0	10202000	11311000	26370000	23006000	24322000	0	159220000	236550000	1379600000	1268400000	1279100000
>tr|B4E2K9|B4E2K9_HUMAN cDNA FLJ54977, weakly similar to Proline-rich protein 4 OS=Homo sapiens PE=2 SV=1	>tr|B4E2K9|B4E2K9_HUMAN cDNA FLJ54977, weakly similar to Proline-rich protein 4 OS=Homo sapiens PE=2 SV=1	>tr|B4E2K9|B4E2K9_HUMAN cDNA FLJ54977, weakly similar to Proline-rich protein 4 OS=Homo sapiens PE=2 SV=1	1	2	2	12.7	14.106	315900000	302750000	367960000	267630000	227160000	338440000	1160000000	1259000000	1341000000	2759300000	2336300000	3330900000
>tr|Q6GMW3|Q6GMW3_HUMAN IGL@ protein OS=Homo sapiens GN=IGL@ PE=2 SV=1;>tr|C6KXN3|C6KXN3_HUMAN Lambda light chain of human immunoglobulin surface antigen-related protein (Fragment) OS=Homo sapiens GN=IgLC-rG PE=2 SV=1;>tr|Q7Z2U7|Q7Z2U7_HUMAN Putative uncharacterized protein OS=Homo sapiens PE=1 SV=1;>sp|P01715|LV401_HUMAN Ig lambda chain V-IV region Bau OS=Homo sapiens PE=1 SV=1;>tr|A2JA15|A2JA15…	>tr|Q6GMW3|Q6GMW3_HUMAN IGL@ protein OS=Homo sapiens GN=IGL@ PE=2 SV=1;>tr|C6KXN3|C6KXN3_HUMAN Lambda light chain of human immunoglobulin surface antigen-related protein (Fragment) OS=Homo sapiens GN=IgLC-rG PE=2 SV=1;>tr|Q7Z2U7|Q7Z2U7_HUMAN Putative uncharacterized protein OS=Homo sapiens PE=1 SV=1	>tr|Q6GMW3|Q6GMW3_HUMAN IGL@ protein OS=Homo sapiens GN=IGL@ PE=2 SV=1;>tr|C6KXN3|C6KXN3_HUMAN Lambda light chain of human immunoglobulin surface antigen-related protein (Fragment) OS=Homo sapiens GN=IgLC-rG PE=2 SV=1;>tr|Q7Z2U7|Q7Z2U7_HUMAN Putative uncha	6	10	0	47	24.653	69702000	64521000	80178000	27691000	26350000	23757000	697020000	681800000	751620000	649400000	651200000	560000000
>tr|C9JVG0|C9JVG0_HUMAN Serotransferrin (Fragment) OS=Homo sapiens GN=TF PE=4 SV=1	>tr|C9JVG0|C9JVG0_HUMAN Serotransferrin (Fragment) OS=Homo sapiens GN=TF PE=4 SV=1	>tr|C9JVG0|C9JVG0_HUMAN Serotransferrin (Fragment) OS=Homo sapiens GN=TF PE=4 SV=1	1	7	1	54.5	14.691	6014300	4474400	5596100	309460	0	0	30071000	23641000	26230000	3628600	0	0
>tr|D6RF35|D6RF35_HUMAN Vitamin D-binding protein OS=Homo sapiens GN=GC PE=4 SV=1;>sp|P02774|VTDB_HUMAN Vitamin D-binding protein OS=Homo sapiens GN=GC PE=1 SV=1;>tr|D6RBJ7|D6RBJ7_HUMAN Vitamin D-binding protein OS=Homo sapiens GN=GC PE=4 SV=1;>tr|D6RF20|D6RF20_HUMAN Vitamin D-binding protein (Fragment) OS=Homo sapiens GN=GC PE=4 SV=1;CON__ENSEMBL:ENSBTAP00000018229;CON__Q3MHN5	>tr|D6RF35|D6RF35_HUMAN Vitamin D-binding protein OS=Homo sapiens GN=GC PE=4 SV=1;>sp|P02774|VTDB_HUMAN Vitamin D-binding protein OS=Homo sapiens GN=GC PE=1 SV=1;>tr|D6RBJ7|D6RBJ7_HUMAN Vitamin D-binding protein OS=Homo sapiens GN=GC PE=4 SV=1	>tr|D6RF35|D6RF35_HUMAN Vitamin D-binding protein OS=Homo sapiens GN=GC PE=4 SV=1;>sp|P02774|VTDB_HUMAN Vitamin D-binding protein OS=Homo sapiens GN=GC PE=1 SV=1;>tr|D6RBJ7|D6RBJ7_HUMAN Vitamin D-binding protein OS=Homo sapiens GN=GC PE=4 SV=1	6	21	21	60.5	53.02	77037000	96039000	111000000	9530500	6401100	7470500	2761000000	2783100000	2907300000	566290000	562350000	601980000
>tr|H3BMA1|H3BMA1_HUMAN Mesothelin OS=Homo sapiens GN=MSLN PE=4 SV=1;>sp|Q13421|MSLN_HUMAN Mesothelin OS=Homo sapiens GN=MSLN PE=1 SV=2;>tr|H3BR90|H3BR90_HUMAN Mesothelin (Fragment) OS=Homo sapiens GN=MSLN PE=4 SV=1;>tr|H3BUX1|H3BUX1_HUMAN Mesothelin (Fragment) OS=Homo sapiens GN=MSLN PE=4 SV=1;>tr|H3BV92|H3BV92_HUMAN Mesothelin (Fragment) OS=Homo sapiens GN=MSLN PE=4 SV=1	>tr|H3BMA1|H3BMA1_HUMAN Mesothelin OS=Homo sapiens GN=MSLN PE=4 SV=1;>sp|Q13421|MSLN_HUMAN Mesothelin OS=Homo sapiens GN=MSLN PE=1 SV=2	>tr|H3BMA1|H3BMA1_HUMAN Mesothelin OS=Homo sapiens GN=MSLN PE=4 SV=1;>sp|Q13421|MSLN_HUMAN Mesothelin OS=Homo sapiens GN=MSLN PE=1 SV=2	5	17	17	35.6	67.084	34659000	41201000	49769000	80085000	75244000	77299000	1171900000	1146800000	1231300000	6259000000	6282100000	5726500000
>tr|O95973|O95973_HUMAN VH4 heavy chain variable region (Fragment) OS=Homo sapiens GN=IGM PE=1 SV=1;>tr|Q86SX2|Q86SX2_HUMAN Full-length cDNA clone CS0DL004YM19 of B cells (Ramos cell line) of Homo sapiens (human) (Fragment) OS=Homo sapiens PE=2 SV=1;>tr|Q7Z3Y6|Q7Z3Y6_HUMAN Rearranged VH4-34 V gene segment (Fragment) OS=Homo sapiens GN=VH4-34 PE=4 SV=1;>tr|A0N5G4|A0N5G4_HUMAN Rheumatoid factor G9 …	>tr|O95973|O95973_HUMAN VH4 heavy chain variable region (Fragment) OS=Homo sapiens GN=IGM PE=1 SV=1;>tr|Q86SX2|Q86SX2_HUMAN Full-length cDNA clone CS0DL004YM19 of B cells (Ramos cell line) of Homo sapiens (human) (Fragment) OS=Homo sapiens PE=2 SV=1;>tr|Q7Z3Y6|Q7Z3Y6_HUMAN Rearranged VH4-34 V gene segment (Fragment) OS=Homo sapiens GN=VH4-34 PE=4 SV=1;>tr|A0N5G4|A0N5G4_HUMAN Rheumatoid factor G9 …	>tr|O95973|O95973_HUMAN VH4 heavy chain variable region (Fragment) OS=Homo sapiens GN=IGM PE=1 SV=1;>tr|Q86SX2|Q86SX2_HUMAN Full-length cDNA clone CS0DL004YM19 of B cells (Ramos cell line) of Homo sapiens (human) (Fragment) OS=Homo sapiens PE=2 SV=1;>tr|Q7	4	2	0	16.7	16.315	0	55507000	32795000	34809000	41089000	34838000	0	203820000	125550000	593160000	737840000	596710000
>tr|Q8TCD0|Q8TCD0_HUMAN Putative uncharacterized protein OS=Homo sapiens PE=2 SV=1;>tr|Q0KKI6|Q0KKI6_HUMAN Immunoblobulin light chain (Fragment) OS=Homo sapiens PE=2 SV=1	>tr|Q8TCD0|Q8TCD0_HUMAN Putative uncharacterized protein OS=Homo sapiens PE=2 SV=1;>tr|Q0KKI6|Q0KKI6_HUMAN Immunoblobulin light chain (Fragment) OS=Homo sapiens PE=2 SV=1	>tr|Q8TCD0|Q8TCD0_HUMAN Putative uncharacterized protein OS=Homo sapiens PE=2 SV=1;>tr|Q0KKI6|Q0KKI6_HUMAN Immunoblobulin light chain (Fragment) OS=Homo sapiens PE=2 SV=1	2	7	0	41	26.234	69677000	61707000	62188000	42079000	46033000	47226000	627090000	586860000	524690000	888140000	1023900000	1001900000
>tr|Q0ZCF6|Q0ZCF6_HUMAN Immunglobulin heavy chain variable region (Fragment) OS=Homo sapiens PE=4 SV=1;>sp|P01770|HV309_HUMAN Ig heavy chain V-III region NIE OS=Homo sapiens PE=1 SV=1	>tr|Q0ZCF6|Q0ZCF6_HUMAN Immunglobulin heavy chain variable region (Fragment) OS=Homo sapiens PE=4 SV=1;>sp|P01770|HV309_HUMAN Ig heavy chain V-III region NIE OS=Homo sapiens PE=1 SV=1	>tr|Q0ZCF6|Q0ZCF6_HUMAN Immunglobulin heavy chain variable region (Fragment) OS=Homo sapiens PE=4 SV=1;>sp|P01770|HV309_HUMAN Ig heavy chain V-III region NIE OS=Homo sapiens PE=1 SV=1	2	2	0	17.8	14.547	7984700	9247400	7716300	3358700	2627900	2635900	64567000	79018000	58494000	64108000	55470000	53661000
>tr|Q0ZCH9|Q0ZCH9_HUMAN Immunglobulin heavy chain variable region (Fragment) OS=Homo sapiens PE=4 SV=1;>tr|Q0ZCJ0|Q0ZCJ0_HUMAN Immunglobulin heavy chain variable region (Fragment) OS=Homo sapiens PE=4 SV=1;>tr|Q0ZCI8|Q0ZCI8_HUMAN Immunglobulin heavy chain variable region (Fragment) OS=Homo sapiens PE=4 SV=1;>tr|Q0ZCJ2|Q0ZCJ2_HUMAN Immunglobulin heavy chain variable region (Fragment) OS=Homo sapie…	>tr|Q0ZCH9|Q0ZCH9_HUMAN Immunglobulin heavy chain variable region (Fragment) OS=Homo sapiens PE=4 SV=1;>tr|Q0ZCJ0|Q0ZCJ0_HUMAN Immunglobulin heavy chain variable region (Fragment) OS=Homo sapiens PE=4 SV=1;>tr|Q0ZCI8|Q0ZCI8_HUMAN Immunglobulin heavy chain variable region (Fragment) OS=Homo sapiens PE=4 SV=1;>tr|Q0ZCJ2|Q0ZCJ2_HUMAN Immunglobulin heavy chain variable region (Fragment) OS=Homo sapie…	>tr|Q0ZCH9|Q0ZCH9_HUMAN Immunglobulin heavy chain variable region (Fragment) OS=Homo sapiens PE=4 SV=1;>tr|Q0ZCJ0|Q0ZCJ0_HUMAN Immunglobulin heavy chain variable region (Fragment) OS=Homo sapiens PE=4 SV=1;>tr|Q0ZCI8|Q0ZCI8_HUMAN Immunglobulin heavy chain	15	4	1	41.3	13.436	152150000	173300000	175920000	73908000	78066000	85484000	1128600000	1248400000	1119000000	1197000000	1325900000	1382500000
>tr|Q2TUW9|Q2TUW9_HUMAN Lactoferrin OS=Homo sapiens PE=2 SV=1	>tr|Q2TUW9|Q2TUW9_HUMAN Lactoferrin OS=Homo sapiens PE=2 SV=1	>tr|Q2TUW9|Q2TUW9_HUMAN Lactoferrin OS=Homo sapiens PE=2 SV=1	1	60	1	76.9	77.98	0	774440	723670	1300100	1137700	1280100	0	30762000	27146000	187780000	70041000	185840000
>tr|Q53H26|Q53H26_HUMAN Transferrin variant (Fragment) OS=Homo sapiens PE=2 SV=1;>tr|B4DI57|B4DI57_HUMAN cDNA FLJ54111, highly similar to Serotransferrin OS=Homo sapiens PE=2 SV=1;>tr|B4DHZ6|B4DHZ6_HUMAN Transferrin, isoform CRA_c OS=Homo sapiens GN=TF PE=2 SV=1	>tr|Q53H26|Q53H26_HUMAN Transferrin variant (Fragment) OS=Homo sapiens PE=2 SV=1;>tr|B4DI57|B4DI57_HUMAN cDNA FLJ54111, highly similar to Serotransferrin OS=Homo sapiens PE=2 SV=1;>tr|B4DHZ6|B4DHZ6_HUMAN Transferrin, isoform CRA_c OS=Homo sapiens GN=TF PE=2 SV=1	>tr|Q53H26|Q53H26_HUMAN Transferrin variant (Fragment) OS=Homo sapiens PE=2 SV=1;>tr|B4DI57|B4DI57_HUMAN cDNA FLJ54111, highly similar to Serotransferrin OS=Homo sapiens PE=2 SV=1;>tr|B4DHZ6|B4DHZ6_HUMAN Transferrin, isoform CRA_c OS=Homo sapiens GN=TF PE=	3	45	0	64.2	77.079	8655100	8232400	9032800	778550	940740	768010	357340000	359170000	349610000	64579000	95987000	64101000
>tr|Q5CZ94|Q5CZ94_HUMAN Putative uncharacterized protein DKFZp781M0386 OS=Homo sapiens GN=DKFZp781M0386 PE=2 SV=1	>tr|Q5CZ94|Q5CZ94_HUMAN Putative uncharacterized protein DKFZp781M0386 OS=Homo sapiens GN=DKFZp781M0386 PE=2 SV=1	>tr|Q5CZ94|Q5CZ94_HUMAN Putative uncharacterized protein DKFZp781M0386 OS=Homo sapiens GN=DKFZp781M0386 PE=2 SV=1	1	7	0	40.2	25.002	0	19287000	22598000	13007000	0	14296000	0	234020000	243250000	382810000	0	409120000
>tr|Q5EBM2|Q5EBM2_HUMAN Putative uncharacterized protein OS=Homo sapiens PE=2 SV=1;>tr|Q6N030|Q6N030_HUMAN Putative uncharacterized protein DKFZp686I15212 OS=Homo sapiens GN=DKFZp686I15212 PE=1 SV=1	>tr|Q5EBM2|Q5EBM2_HUMAN Putative uncharacterized protein OS=Homo sapiens PE=2 SV=1;>tr|Q6N030|Q6N030_HUMAN Putative uncharacterized protein DKFZp686I15212 OS=Homo sapiens GN=DKFZp686I15212 PE=1 SV=1	>tr|Q5EBM2|Q5EBM2_HUMAN Putative uncharacterized protein OS=Homo sapiens PE=2 SV=1;>tr|Q6N030|Q6N030_HUMAN Putative uncharacterized protein DKFZp686I15212 OS=Homo sapiens GN=DKFZp686I15212 PE=1 SV=1	2	14	0	35.6	56.813	55075000	63896000	76577000	23244000	20665000	24130000	1824700000	1465300000	1615600000	781140000	654970000	746580000
>tr|Q5NV82|Q5NV82_HUMAN V4-2 protein (Fragment) OS=Homo sapiens GN=IGLV5-45 PE=1 SV=1	>tr|Q5NV82|Q5NV82_HUMAN V4-2 protein (Fragment) OS=Homo sapiens GN=IGLV5-45 PE=1 SV=1	>tr|Q5NV82|Q5NV82_HUMAN V4-2 protein (Fragment) OS=Homo sapiens GN=IGLV5-45 PE=1 SV=1	1	1	1	13.5	11.142	2357400	1680500	2102500	462150	490680	459990	12847000	9677900	10741000	5906400	4596400	4202900
>tr|Q5NV86|Q5NV86_HUMAN V1-20 protein (Fragment) OS=Homo sapiens GN=IGLV10-54 PE=4 SV=1	>tr|Q5NV86|Q5NV86_HUMAN V1-20 protein (Fragment) OS=Homo sapiens GN=IGLV10-54 PE=4 SV=1	>tr|Q5NV86|Q5NV86_HUMAN V1-20 protein (Fragment) OS=Homo sapiens GN=IGLV10-54 PE=4 SV=1	1	1	1	11.2	10.348	57954000	53158000	54381000	31321000	26803000	28327000	115910000	112350000	101960000	146900000	132480000	133550000
>tr|Q68CK4|Q68CK4_HUMAN Leucine-rich alpha-2-glycoprotein OS=Homo sapiens GN=HMFT1766 PE=2 SV=1	>tr|Q68CK4|Q68CK4_HUMAN Leucine-rich alpha-2-glycoprotein OS=Homo sapiens GN=HMFT1766 PE=2 SV=1	>tr|Q68CK4|Q68CK4_HUMAN Leucine-rich alpha-2-glycoprotein OS=Homo sapiens GN=HMFT1766 PE=2 SV=1	1	1	1	6.6	38.167	0	535600	263120	184900	221990	112590	0	8311400	4777700	6959100	8140400	5016500
>tr|Q6GMW4|Q6GMW4_HUMAN IGL@ protein OS=Homo sapiens GN=IGL@ PE=2 SV=1;>tr|Q96E61|Q96E61_HUMAN Putative uncharacterized protein OS=Homo sapiens PE=2 SV=1;>tr|Q6GMW6|Q6GMW6_HUMAN Putative uncharacterized protein OS=Homo sapiens PE=2 SV=1;>tr|Q6DHW4|Q6DHW4_HUMAN Putative uncharacterized protein OS=Homo sapiens PE=2 SV=1;>tr|Q6GMV7|Q6GMV7_HUMAN Putative uncharacterized protein OS=Homo sapiens PE=2 S…	>tr|Q6GMW4|Q6GMW4_HUMAN IGL@ protein OS=Homo sapiens GN=IGL@ PE=2 SV=1;>tr|Q96E61|Q96E61_HUMAN Putative uncharacterized protein OS=Homo sapiens PE=2 SV=1;>tr|Q6GMW6|Q6GMW6_HUMAN Putative uncharacterized protein OS=Homo sapiens PE=2 SV=1;>tr|Q6DHW4|Q6DHW4_HUMAN Putative uncharacterized protein OS=Homo sapiens PE=2 SV=1;>tr|Q6GMV7|Q6GMV7_HUMAN Putative uncharacterized protein OS=Homo sapiens PE=2 S…	>tr|Q6GMW4|Q6GMW4_HUMAN IGL@ protein OS=Homo sapiens GN=IGL@ PE=2 SV=1;>tr|Q96E61|Q96E61_HUMAN Putative uncharacterized protein OS=Homo sapiens PE=2 SV=1;>tr|Q6GMW6|Q6GMW6_HUMAN Putative uncharacterized protein OS=Homo sapiens PE=2 SV=1;>tr|Q6DHW4|Q6DHW4_H	24	9	0	47.6	24.854	21151000	16054000	19417000	14731000	13056000	15206000	282880000	226890000	243440000	509070000	480150000	525440000
>tr|Q6GMX6|Q6GMX6_HUMAN IGH@ protein OS=Homo sapiens GN=IGH@ PE=1 SV=1;>tr|A2NYU6|A2NYU6_HUMAN Heavy chain Fab (Fragment) OS=Homo sapiens PE=2 SV=1;>sp|P01825|HV207_HUMAN Ig heavy chain V-II region NEWM OS=Homo sapiens PE=1 SV=1	>tr|Q6GMX6|Q6GMX6_HUMAN IGH@ protein OS=Homo sapiens GN=IGH@ PE=1 SV=1	>tr|Q6GMX6|Q6GMX6_HUMAN IGH@ protein OS=Homo sapiens GN=IGH@ PE=1 SV=1	3	16	1	44.5	51.082	1261600000	1245700000	1344500000	192910000	183120000	181150000	28134000000	29424000000	28187000000	9685400000	10351000000	9887700000
>tr|Q6MZQ6|Q6MZQ6_HUMAN Putative uncharacterized protein DKFZp686G11190 OS=Homo sapiens GN=DKFZp686G11190 PE=1 SV=1;>tr|Q6N094|Q6N094_HUMAN Putative uncharacterized protein DKFZp686O01196 OS=Homo sapiens GN=DKFZp686O01196 PE=1 SV=1;>tr|A0N7I9|A0N7I9_HUMAN F5-20 (Fragment) OS=Homo sapiens GN=F5-20 PE=1 SV=1	>tr|Q6MZQ6|Q6MZQ6_HUMAN Putative uncharacterized protein DKFZp686G11190 OS=Homo sapiens GN=DKFZp686G11190 PE=1 SV=1;>tr|Q6N094|Q6N094_HUMAN Putative uncharacterized protein DKFZp686O01196 OS=Homo sapiens GN=DKFZp686O01196 PE=1 SV=1	>tr|Q6MZQ6|Q6MZQ6_HUMAN Putative uncharacterized protein DKFZp686G11190 OS=Homo sapiens GN=DKFZp686G11190 PE=1 SV=1;>tr|Q6N094|Q6N094_HUMAN Putative uncharacterized protein DKFZp686O01196 OS=Homo sapiens GN=DKFZp686O01196 PE=1 SV=1	3	15	1	38.1	52.042	9373400	9506100	11048000	5590300	5373300	5726500	224070000	233760000	241520000	324180000	326140000	330670000
>tr|Q6MZV7|Q6MZV7_HUMAN Putative uncharacterized protein DKFZp686C11235 OS=Homo sapiens GN=DKFZp686C11235 PE=1 SV=1;>tr|Q6PYX1|Q6PYX1_HUMAN Hepatitis B virus receptor binding protein (Fragment) OS=Homo sapiens PE=1 SV=1;>tr|A2NYQ9|A2NYQ9_HUMAN Anti-folate binding protein (Fragment) OS=Homo sapiens GN=HuVH8B VH PE=2 SV=1;>tr|Q0ZCI1|Q0ZCI1_HUMAN Immunglobulin heavy chain variable region (Fragment) …	>tr|Q6MZV7|Q6MZV7_HUMAN Putative uncharacterized protein DKFZp686C11235 OS=Homo sapiens GN=DKFZp686C11235 PE=1 SV=1;>tr|Q6PYX1|Q6PYX1_HUMAN Hepatitis B virus receptor binding protein (Fragment) OS=Homo sapiens PE=1 SV=1	>tr|Q6MZV7|Q6MZV7_HUMAN Putative uncharacterized protein DKFZp686C11235 OS=Homo sapiens GN=DKFZp686C11235 PE=1 SV=1;>tr|Q6PYX1|Q6PYX1_HUMAN Hepatitis B virus receptor binding protein (Fragment) OS=Homo sapiens PE=1 SV=1	7	16	0	43.1	52.12	9861900	10210000	12180000	414770	0	0	207100000	226560000	239780000	20427000	0	0
>tr|Q6N041|Q6N041_HUMAN Putative uncharacterized protein DKFZp686O16217 (Fragment) OS=Homo sapiens GN=DKFZp686O16217 PE=2 SV=1;>tr|Q6N091|Q6N091_HUMAN Putative uncharacterized protein DKFZp686C02220 (Fragment) OS=Homo sapiens GN=DKFZp686C02220 PE=1 SV=1;>tr|Q9Y298|Q9Y298_HUMAN IgG VH protein (Fragment) OS=Homo sapiens GN=IgG VH PE=2 SV=1;>tr|A2NW97|A2NW97_HUMAN Rheumatoid factor Vh I region (Frag…	>tr|Q6N041|Q6N041_HUMAN Putative uncharacterized protein DKFZp686O16217 (Fragment) OS=Homo sapiens GN=DKFZp686O16217 PE=2 SV=1;>tr|Q6N091|Q6N091_HUMAN Putative uncharacterized protein DKFZp686C02220 (Fragment) OS=Homo sapiens GN=DKFZp686C02220 PE=1 SV=1	>tr|Q6N041|Q6N041_HUMAN Putative uncharacterized protein DKFZp686O16217 (Fragment) OS=Homo sapiens GN=DKFZp686O16217 PE=2 SV=1;>tr|Q6N091|Q6N091_HUMAN Putative uncharacterized protein DKFZp686C02220 (Fragment) OS=Homo sapiens GN=DKFZp686C02220 PE=1 SV=1	6	16	7	53.4	54.125	279590000	281080000	298870000	188180000	166450000	181640000	5853700000	5995100000	5538600000	10270000000	10313000000	9511000000
>tr|Q6N089|Q6N089_HUMAN Putative uncharacterized protein DKFZp686P15220 OS=Homo sapiens GN=DKFZp686P15220 PE=1 SV=1;>tr|A0N5G2|A0N5G2_HUMAN Rheumatoid factor C6 heavy chain (Fragment) OS=Homo sapiens GN=VH3 PE=2 SV=1;>tr|Q9UL87|Q9UL87_HUMAN Myosin-reactive immunoglobulin heavy chain variable region (Fragment) OS=Homo sapiens PE=2 SV=1;>tr|B1N7B6|B1N7B6_HUMAN Cryocrystalglobulin CC1 heavy chain va…	>tr|Q6N089|Q6N089_HUMAN Putative uncharacterized protein DKFZp686P15220 OS=Homo sapiens GN=DKFZp686P15220 PE=1 SV=1	>tr|Q6N089|Q6N089_HUMAN Putative uncharacterized protein DKFZp686P15220 OS=Homo sapiens GN=DKFZp686P15220 PE=1 SV=1	4	16	0	43.2	51.724	0	7893000	9131200	5021800	4350900	4725200	0	173060000	176840000	263760000	240830000	249470000
>tr|Q6N092|Q6N092_HUMAN Putative uncharacterized protein DKFZp686K18196 (Fragment) OS=Homo sapiens GN=DKFZp686K18196 PE=1 SV=1;>tr|Q96DK0|Q96DK0_HUMAN CDNA FLJ25298 fis, clone STM07683, highly similar to Protein Tro alpha1 H,myeloma OS=Homo sapiens PE=2 SV=1;>tr|Q6ZW64|Q6ZW64_HUMAN cDNA FLJ41552 fis, clone COLON2004478, highly similar to Protein Tro alpha1 H,myeloma OS=Homo sapiens PE=1 SV=1	>tr|Q6N092|Q6N092_HUMAN Putative uncharacterized protein DKFZp686K18196 (Fragment) OS=Homo sapiens GN=DKFZp686K18196 PE=1 SV=1;>tr|Q96DK0|Q96DK0_HUMAN CDNA FLJ25298 fis, clone STM07683, highly similar to Protein Tro alpha1 H,myeloma OS=Homo sapiens PE=2 SV=1;>tr|Q6ZW64|Q6ZW64_HUMAN cDNA FLJ41552 fis, clone COLON2004478, highly similar to Protein Tro alpha1 H,myeloma OS=Homo sapiens PE=1 SV=1	>tr|Q6N092|Q6N092_HUMAN Putative uncharacterized protein DKFZp686K18196 (Fragment) OS=Homo sapiens GN=DKFZp686K18196 PE=1 SV=1;>tr|Q96DK0|Q96DK0_HUMAN CDNA FLJ25298 fis, clone STM07683, highly similar to Protein Tro alpha1 H,myeloma OS=Homo sapiens PE=2 SV	3	16	2	44.7	56.423	158080000	160980000	199540000	115550000	110510000	107060000	3877500000	4172500000	4329600000	6466800000	6488600000	6111300000
>tr|Q6NS95|Q6NS95_HUMAN IGL@ protein OS=Homo sapiens GN=IGL@ PE=2 SV=1;>tr|A2N2F5|A2N2F5_HUMAN VL4 protein (Fragment) OS=Homo sapiens GN=VL4 PE=2 SV=1	>tr|Q6NS95|Q6NS95_HUMAN IGL@ protein OS=Homo sapiens GN=IGL@ PE=2 SV=1	>tr|Q6NS95|Q6NS95_HUMAN IGL@ protein OS=Homo sapiens GN=IGL@ PE=2 SV=1	2	9	0	50.4	25.148	58480000	56312000	56262000	37919000	39801000	41643000	973900000	959280000	904700000	769010000	1170700000	1143400000
>tr|Q6P5S8|Q6P5S8_HUMAN IGK@ protein OS=Homo sapiens GN=IGK@ PE=1 SV=1	>tr|Q6P5S8|Q6P5S8_HUMAN IGK@ protein OS=Homo sapiens GN=IGK@ PE=1 SV=1	>tr|Q6P5S8|Q6P5S8_HUMAN IGK@ protein OS=Homo sapiens GN=IGK@ PE=1 SV=1	1	9	1	49.6	25.773	2247000000	2697900000	3042600000	1199900000	1392000000	1413000000	26140000000	27329000000	27804000000	28954000000	31395000000	31827000000
>tr|Q6PIL8|Q6PIL8_HUMAN IGK@ protein OS=Homo sapiens GN=IGK@ PE=1 SV=1;>tr|Q6PJF2|Q6PJF2_HUMAN IGK@ protein OS=Homo sapiens GN=IGK@ PE=1 SV=1;>tr|Q6GMX0|Q6GMX0_HUMAN Putative uncharacterized protein OS=Homo sapiens PE=2 SV=1;>tr|Q7Z3Y4|Q7Z3Y4_HUMAN Putative uncharacterized protein OS=Homo sapiens PE=1 SV=1;>tr|Q5EFE6|Q5EFE6_HUMAN Anti-RhD monoclonal T125 kappa light chain OS=Homo sapiens PE=2 SV=…	>tr|Q6PIL8|Q6PIL8_HUMAN IGK@ protein OS=Homo sapiens GN=IGK@ PE=1 SV=1;>tr|Q6PJF2|Q6PJF2_HUMAN IGK@ protein OS=Homo sapiens GN=IGK@ PE=1 SV=1;>tr|Q6GMX0|Q6GMX0_HUMAN Putative uncharacterized protein OS=Homo sapiens PE=2 SV=1;>tr|Q7Z3Y4|Q7Z3Y4_HUMAN Putative uncharacterized protein OS=Homo sapiens PE=1 SV=1;>tr|Q5EFE6|Q5EFE6_HUMAN Anti-RhD monoclonal T125 kappa light chain OS=Homo sapiens PE=2 SV=…	>tr|Q6PIL8|Q6PIL8_HUMAN IGK@ protein OS=Homo sapiens GN=IGK@ PE=1 SV=1;>tr|Q6PJF2|Q6PJF2_HUMAN IGK@ protein OS=Homo sapiens GN=IGK@ PE=1 SV=1;>tr|Q6GMX0|Q6GMX0_HUMAN Putative uncharacterized protein OS=Homo sapiens PE=2 SV=1;>tr|Q7Z3Y4|Q7Z3Y4_HUMAN Putativ	7	8	0	45.8	25.834	11245000	12665000	8950500	8154500	9519400	8625700	123700000	147210000	92297000	210360000	258780000	223660000
>tr|Q6PIQ7|Q6PIQ7_HUMAN IGL@ protein OS=Homo sapiens GN=IGL@ PE=2 SV=1;>tr|Q6GMX4|Q6GMX4_HUMAN IGL@ protein OS=Homo sapiens GN=IGL@ PE=1 SV=1;>tr|Q6IPQ0|Q6IPQ0_HUMAN IGL@ protein OS=Homo sapiens GN=IGL@ PE=2 SV=1;>tr|Q96JD0|Q96JD0_HUMAN Amyloid lambda 6 light chain variable region SAR (Fragment) OS=Homo sapiens PE=1 SV=1	>tr|Q6PIQ7|Q6PIQ7_HUMAN IGL@ protein OS=Homo sapiens GN=IGL@ PE=2 SV=1;>tr|Q6GMX4|Q6GMX4_HUMAN IGL@ protein OS=Homo sapiens GN=IGL@ PE=1 SV=1;>tr|Q6IPQ0|Q6IPQ0_HUMAN IGL@ protein OS=Homo sapiens GN=IGL@ PE=2 SV=1	>tr|Q6PIQ7|Q6PIQ7_HUMAN IGL@ protein OS=Homo sapiens GN=IGL@ PE=2 SV=1;>tr|Q6GMX4|Q6GMX4_HUMAN IGL@ protein OS=Homo sapiens GN=IGL@ PE=1 SV=1;>tr|Q6IPQ0|Q6IPQ0_HUMAN IGL@ protein OS=Homo sapiens GN=IGL@ PE=2 SV=1	4	10	0	46.6	25.021	19703000	11005000	25574000	3026200	708500	1715700	216730000	127920000	263720000	78066000	19260000	44488000
>tr|Q6ZVX0|Q6ZVX0_HUMAN cDNA FLJ41981 fis, clone SMINT2011888, highly similar to Protein Tro alpha1 H,myeloma OS=Homo sapiens PE=1 SV=1;>tr|Q6MZX9|Q6MZX9_HUMAN Putative uncharacterized protein DKFZp686M08189 OS=Homo sapiens GN=DKFZp686M08189 PE=2 SV=1;>tr|A2J422|A2J422_HUMAN Anti-HER3 scFv (Fragment) OS=Homo sapiens PE=2 SV=1;>tr|Q65ZC9|Q65ZC9_HUMAN Single-chain Fv (Fragment) OS=Homo sapiens GN=s…	>tr|Q6ZVX0|Q6ZVX0_HUMAN cDNA FLJ41981 fis, clone SMINT2011888, highly similar to Protein Tro alpha1 H,myeloma OS=Homo sapiens PE=1 SV=1;>tr|Q6MZX9|Q6MZX9_HUMAN Putative uncharacterized protein DKFZp686M08189 OS=Homo sapiens GN=DKFZp686M08189 PE=2 SV=1	>tr|Q6ZVX0|Q6ZVX0_HUMAN cDNA FLJ41981 fis, clone SMINT2011888, highly similar to Protein Tro alpha1 H,myeloma OS=Homo sapiens PE=1 SV=1;>tr|Q6MZX9|Q6MZX9_HUMAN Putative uncharacterized protein DKFZp686M08189 OS=Homo sapiens GN=DKFZp686M08189 PE=2 SV=1	21	16	1	54	52.874	336350000	408640000	459710000	227600000	224210000	221670000	7727600000	8387900000	8182700000	11921000000	12695000000	11261000000
>tr|Q86TT1|Q86TT1_HUMAN Full-length cDNA clone CS0DD006YL02 of Neuroblastoma of Homo sapiens (human) OS=Homo sapiens PE=2 SV=1	>tr|Q86TT1|Q86TT1_HUMAN Full-length cDNA clone CS0DD006YL02 of Neuroblastoma of Homo sapiens (human) OS=Homo sapiens PE=2 SV=1	>tr|Q86TT1|Q86TT1_HUMAN Full-length cDNA clone CS0DD006YL02 of Neuroblastoma of Homo sapiens (human) OS=Homo sapiens PE=2 SV=1	1	13	1	41.1	41.272	3072800	2507700	2962900	0	1686200	1654000	64529000	55649000	58329000	0	87511000	81876000
>tr|Q8N355|Q8N355_HUMAN IGL@ protein OS=Homo sapiens GN=IGL@ PE=2 SV=1;>tr|A0N5G3|A0N5G3_HUMAN Rheumatoid factor G9 light chain (Fragment) OS=Homo sapiens GN=V<lambda>3 PE=2 SV=1;>tr|Q5NV74|Q5NV74_HUMAN V2-14 protein (Fragment) OS=Homo sapiens GN=V2-14 PE=2 SV=1;>tr|A2MYD5|A2MYD5_HUMAN V2-6 protein (Fragment) OS=Homo sapiens GN=V2-6 PE=4 SV=1;>tr|Q5NV85|Q5NV85_HUMAN V2-8 protein (Fragment) OS=Hom…	>tr|Q8N355|Q8N355_HUMAN IGL@ protein OS=Homo sapiens GN=IGL@ PE=2 SV=1	>tr|Q8N355|Q8N355_HUMAN IGL@ protein OS=Homo sapiens GN=IGL@ PE=2 SV=1	5	11	1	58.1	24.792	93970000	86417000	138000000	51858000	54432000	49249000	1155100000	1240700000	1512300000	1762000000	1714300000	1611900000
>tr|Q8NCL6|Q8NCL6_HUMAN cDNA FLJ90170 fis, clone MAMMA1000370, highly similar to Ig alpha-1 chain C region OS=Homo sapiens PE=1 SV=1;>tr|Q6MZW0|Q6MZW0_HUMAN Putative uncharacterized protein DKFZp686J11235 (Fragment) OS=Homo sapiens GN=DKFZp686J11235 PE=1 SV=1;>tr|Q9UP60|Q9UP60_HUMAN SNC73 protein OS=Homo sapiens GN=SNC73 PE=2 SV=1;>sp|P01876|IGHA1_HUMAN Ig alpha-1 chain C region OS=Homo sapiens G…	>tr|Q8NCL6|Q8NCL6_HUMAN cDNA FLJ90170 fis, clone MAMMA1000370, highly similar to Ig alpha-1 chain C region OS=Homo sapiens PE=1 SV=1;>tr|Q6MZW0|Q6MZW0_HUMAN Putative uncharacterized protein DKFZp686J11235 (Fragment) OS=Homo sapiens GN=DKFZp686J11235 PE=1 SV=1;>tr|Q9UP60|Q9UP60_HUMAN SNC73 protein OS=Homo sapiens GN=SNC73 PE=2 SV=1;>sp|P01876|IGHA1_HUMAN Ig alpha-1 chain C region OS=Homo sapiens G…	>tr|Q8NCL6|Q8NCL6_HUMAN cDNA FLJ90170 fis, clone MAMMA1000370, highly similar to Ig alpha-1 chain C region OS=Homo sapiens PE=1 SV=1;>tr|Q6MZW0|Q6MZW0_HUMAN Putative uncharacterized protein DKFZp686J11235 (Fragment) OS=Homo sapiens GN=DKFZp686J11235 PE=1 S	6	16	1	46.7	53.224	0	2098100	3017300	1152700	1334600	1170000	0	59678000	67408000	64913000	72790000	66561000
>tr|Q8NEJ1|Q8NEJ1_HUMAN Putative uncharacterized protein OS=Homo sapiens PE=2 SV=1;>tr|Q6GMX3|Q6GMX3_HUMAN IGL@ protein OS=Homo sapiens GN=IGL@ PE=2 SV=1;>tr|Q567P1|Q567P1_HUMAN IGL@ protein OS=Homo sapiens GN=IGL@ PE=2 SV=1;>tr|A2MYD0|A2MYD0_HUMAN V1-17 protein (Fragment) OS=Homo sapiens GN=V1-17 PE=4 SV=1	>tr|Q8NEJ1|Q8NEJ1_HUMAN Putative uncharacterized protein OS=Homo sapiens PE=2 SV=1;>tr|Q6GMX3|Q6GMX3_HUMAN IGL@ protein OS=Homo sapiens GN=IGL@ PE=2 SV=1;>tr|Q567P1|Q567P1_HUMAN IGL@ protein OS=Homo sapiens GN=IGL@ PE=2 SV=1	>tr|Q8NEJ1|Q8NEJ1_HUMAN Putative uncharacterized protein OS=Homo sapiens PE=2 SV=1;>tr|Q6GMX3|Q6GMX3_HUMAN IGL@ protein OS=Homo sapiens GN=IGL@ PE=2 SV=1;>tr|Q567P1|Q567P1_HUMAN IGL@ protein OS=Homo sapiens GN=IGL@ PE=2 SV=1	4	12	2	57.2	25.024	2947100000	2469600000	2573100000	1412000000	1254100000	1418000000	32573000000	32736000000	31130000000	37059000000	34593000000	32854000000
>tr|Q96K68|Q96K68_HUMAN cDNA FLJ14473 fis, clone MAMMA1001080, highly similar to Homo sapiens SNC73 protein (SNC73) mRNA OS=Homo sapiens PE=2 SV=1	>tr|Q96K68|Q96K68_HUMAN cDNA FLJ14473 fis, clone MAMMA1001080, highly similar to Homo sapiens SNC73 protein (SNC73) mRNA OS=Homo sapiens PE=2 SV=1	>tr|Q96K68|Q96K68_HUMAN cDNA FLJ14473 fis, clone MAMMA1001080, highly similar to Homo sapiens SNC73 protein (SNC73) mRNA OS=Homo sapiens PE=2 SV=1	1	17	1	49.2	53.088	3061800000	2979000000	3525600000	2123700000	2072900000	2144500000	68798000000	72742000000	68441000000	111760000000	111840000000	110420000000
>tr|Q96SB0|Q96SB0_HUMAN Anti-streptococcal/anti-myosin immunoglobulin lambda light chain variable region (Fragment) OS=Homo sapiens PE=2 SV=1	>tr|Q96SB0|Q96SB0_HUMAN Anti-streptococcal/anti-myosin immunoglobulin lambda light chain variable region (Fragment) OS=Homo sapiens PE=2 SV=1	>tr|Q96SB0|Q96SB0_HUMAN Anti-streptococcal/anti-myosin immunoglobulin lambda light chain variable region (Fragment) OS=Homo sapiens PE=2 SV=1	1	3	1	22.2	11.594	0	0	0	5648500	8791400	7779800	0	0	0	79479000	130360000	110030000
>tr|Q9NPP6|Q9NPP6_HUMAN Immunoglobulin heavy chain variant (Fragment) OS=Homo sapiens PE=2 SV=1	>tr|Q9NPP6|Q9NPP6_HUMAN Immunoglobulin heavy chain variant (Fragment) OS=Homo sapiens PE=2 SV=1	>tr|Q9NPP6|Q9NPP6_HUMAN Immunoglobulin heavy chain variant (Fragment) OS=Homo sapiens PE=2 SV=1	1	15	1	59.6	44.786	12251000	12944000	16540000	7438800	6756500	6709400	232770000	259870000	294610000	331460000	317260000	300490000
>tr|Q9UL71|Q9UL71_HUMAN Myosin-reactive immunoglobulin heavy chain variable region (Fragment) OS=Homo sapiens PE=1 SV=1	>tr|Q9UL71|Q9UL71_HUMAN Myosin-reactive immunoglobulin heavy chain variable region (Fragment) OS=Homo sapiens PE=1 SV=1	>tr|Q9UL71|Q9UL71_HUMAN Myosin-reactive immunoglobulin heavy chain variable region (Fragment) OS=Homo sapiens PE=1 SV=1	1	3	0	33.9	13.154	3477700	16954000	17049000	4784800	4454900	4807600	22164000	121610000	101860000	85619000	84407000	86256000
>tr|Q9UL82|Q9UL82_HUMAN Myosin-reactive immunoglobulin light chain variable region (Fragment) OS=Homo sapiens PE=2 SV=1	>tr|Q9UL82|Q9UL82_HUMAN Myosin-reactive immunoglobulin light chain variable region (Fragment) OS=Homo sapiens PE=2 SV=1	>tr|Q9UL82|Q9UL82_HUMAN Myosin-reactive immunoglobulin light chain variable region (Fragment) OS=Homo sapiens PE=2 SV=1	1	2	1	10.3	11.445	27463000	0	0	0	0	0	137320000	0	0	0	0	0
>tr|Q9UL85|Q9UL85_HUMAN Myosin-reactive immunoglobulin kappa chain variable region (Fragment) OS=Homo sapiens PE=1 SV=1;>tr|Q9UL83|Q9UL83_HUMAN Myosin-reactive immunoglobulin light chain variable region (Fragment) OS=Homo sapiens PE=1 SV=1	>tr|Q9UL85|Q9UL85_HUMAN Myosin-reactive immunoglobulin kappa chain variable region (Fragment) OS=Homo sapiens PE=1 SV=1;>tr|Q9UL83|Q9UL83_HUMAN Myosin-reactive immunoglobulin light chain variable region (Fragment) OS=Homo sapiens PE=1 SV=1	>tr|Q9UL85|Q9UL85_HUMAN Myosin-reactive immunoglobulin kappa chain variable region (Fragment) OS=Homo sapiens PE=1 SV=1;>tr|Q9UL83|Q9UL83_HUMAN Myosin-reactive immunoglobulin light chain variable region (Fragment) OS=Homo sapiens PE=1 SV=1	2	2	1	22.9	11.761	27350000	31085000	31482000	17733000	16257000	18268000	109400000	131390000	118050000	166350000	160710000	172250000
>tr|Q9UL88|Q9UL88_HUMAN Myosin-reactive immunoglobulin heavy chain variable region (Fragment) OS=Homo sapiens PE=2 SV=1	>tr|Q9UL88|Q9UL88_HUMAN Myosin-reactive immunoglobulin heavy chain variable region (Fragment) OS=Homo sapiens PE=2 SV=1	>tr|Q9UL88|Q9UL88_HUMAN Myosin-reactive immunoglobulin heavy chain variable region (Fragment) OS=Homo sapiens PE=2 SV=1	1	2	1	19.8	14.142	79606000	78513000	83622000	37695000	37314000	37354000	557240000	580760000	548740000	618810000	645500000	616360000
